# Supplementary material for: Nucleophilic halo-Michael addition under Lewis-base activation
Source: Royal Society of Chemistry journal article supplement (doi:10.1039/c9cc07068k), 2019-01-01
Supplement: c9cc07068k1.pdf [file c9cc07068k1.pdf]

## Nucleophilic *Halo*-Michael Addition under Lewis-Base Activation

Víctor Laina-Martín,<sup>†a</sup> Ignacio Pérez,<sup>†a</sup> Jose A. Fernández-Salas,<sup>a\*</sup> and José Alemán<sup>a,b\*</sup>

a. *Departamento de Química Orgánica (Módulo 1), Facultad de Ciencias, Universidad Autónoma de Madrid, 28049-Madrid, Spain. E-mail: jose.aleman@uam.es; webpage: www.uam.es/jose.aleman*

b. *Institute for Advanced Research in Chemical Sciences (IAdChem), Universidad Autónoma de Madrid, 28049 Madrid, Spain.*

|                                                                                                                                                                 |    |
|-----------------------------------------------------------------------------------------------------------------------------------------------------------------|----|
| 1. General methods and starting materials. ....                                                                                                                 | 2  |
| 2. Optimization of the reaction conditions. ....                                                                                                                | 3  |
| 2.1. Optimization of the $\beta$ -chlorination reaction. ....                                                                                                   | 3  |
| 2.2. Optimization of the $\beta$ -bromination reaction. ....                                                                                                    | 4  |
| 3. Synthesis and characterization data of $\alpha,\beta$ -unsaturated <i>N</i> -acyloxazolidinones <b>1</b> . ....                                              | 5  |
| 3.1. General procedure A: Synthesis of $\alpha,\beta$ -unsaturated <i>N</i> -acyloxazolidinones <b>1</b> . ....                                                 | 5  |
| 3.2. General procedure B: Synthesis of $\alpha,\beta$ -unsaturated <i>N</i> -acyloxazolidinones <b>1</b> . ....                                                 | 5  |
| 4. General procedure C for the nucleophilic halogenation of $\alpha,\beta$ -unsaturated <i>N</i> -acyloxazolidinones. Synthesis of <b>3</b> and <b>4</b> . .... | 12 |
| 5. General procedure D for the nucleophilic bromination to diverse Michael acceptors. ....                                                                      | 19 |
| 6. General procedures for the removal of the chiral auxiliary. ....                                                                                             | 24 |
| 6.1. General procedure E: removal of the chiral auxiliary to the alcohol. ....                                                                                  | 24 |
| 6.2. General procedure F: removal of the chiral auxiliary to the carboxylic acid. ....                                                                          | 25 |
| 7. NMR spectra. ....                                                                                                                                            | 27 |
| 8. Single Crystal X-Ray Structure of compound <b>4e</b> . ....                                                                                                  | 67 |

## 1. General methods and starting materials.

All solvents were dried using activated 4Å molecular sieves and stored under nitrogen. 4Å molecular sieves, 1.6-2.5 mm of particle size, were activated by microwave (700W) (3 x 60 sec) and subsequent cycles of vacuum/nitrogen. For thin layer chromatography (TLC) silica gel plates with fluorescence indicator 254 nm were used and compounds were visualized by irradiation with UV light and/or by treatment with a solution of potassium permanganate in water followed by heating. Flash column chromatography was performed using Geduran® Silica Gel 60 (0.040-0.063 nm) or Iatrobeds 6RS-8060 silica gel and compressed air. Cyclohexane and ethyl acetate for flash chromatography were acquired from commercial sources and were used without previous purification. Optical rotation was recorded on a Perkin-Elmer 241 MC Polarimeter in cells with 10 cm path length; the specific solvents and concentrations (in g/100 mL) are indicated. NMR spectra were acquired on a *Bruker Avance 300 MHz spectrometer*, running at 300, 75 and 282 MHz for <sup>1</sup>H, <sup>13</sup>C and <sup>19</sup>F respectively. Chemical shifts (δ) are reported in ppm relative to residual solvent signals (CDCl<sub>3</sub>, 7.26 ppm for <sup>1</sup>H NMR and 77.0 ppm for <sup>13</sup>C NMR respectively). <sup>13</sup>C and <sup>19</sup>F spectra were acquired on a broad band decoupled mode. The following abbreviations are used to describe peak patterns when appropriate: s (singlet), d (doublet), t (triplet), q (quartet), quint (quintet), m (multiplet), bs (broad singlet). Electrospray ionization has been used for measuring the exact mass (indicated for each case): MS (ESI) (Electrospray ionization mass spectroscopy) was acquired with an *Agilent Technologies 6120 Quadrupole LC/MS*. In this technique, *MassWorks software ver. 4.0.0.0 (Cerno Bioscience)* was used for the formula identification. *MassWorks* is a MS calibration software which calibrates for isotope profile as well as for mass accuracy, allowing highly accurate comparisons between calibrated and theoretical spectra.<sup>1</sup>

Crystal of compound **4e** was mounted at low temperature in inert oil on a glass fiber. Data were collected on a *Bruker X8 APPEX II* CCD-based diffractometer, equipped with a graphite monochromated MoKα (radiation source λ = 0.71073 Å).

---

<sup>1</sup> a) Y. Wang and M. Gu, *Anal. Chem.*, 2010, **82**, 7055; b) Y. Wang, Methods for Operating MS Instrument Systems, United States Patent No. 6,983,213, **2006**; c) N. Ochiaia, K. Sasamoto, K. MacNamara *Journal of Chromatography A*, 2012, **1270**, 296; d) H.-P. Ho, R.-Y. Lee, C.-Y. Chen, S.-R. Wang, Z.-G. Li and M.-R. Lee, *Rapid Commun. Mass Spectrom.* 2011, **25**, 25.

## 2. Optimization of the reaction conditions.

### 2.1. Optimization of the $\beta$ -chlorination reaction.<sup>a</sup>

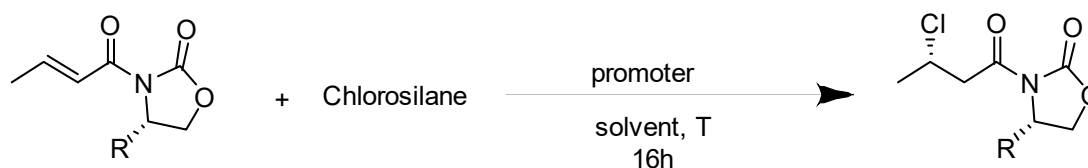

| Entry     | R                 | Chlorosilane             | Promoter                    | Solvent                | T (°C)    | Conversion (%) | d.r.        |
|-----------|-------------------|--------------------------|-----------------------------|------------------------|-----------|----------------|-------------|
| 1         | <i>i</i> Pr       | Allyl                    | -                           | DCM                    | 25        | <10            | -           |
| 2         | <i>i</i> Pr       | Allyl                    | Yb(OTf) <sub>3</sub>        | DCM                    | 25        | 57             | 60:40       |
| 3         | <i>i</i> Pr       | Allyl                    | Yb(OTf) <sub>3</sub>        | THF                    | 25        | n.r.           | -           |
| 4         | <i>i</i> Pr       | Allyl                    | Yb(OTf) <sub>3</sub>        | Toluene                | 25        | n.r.           | -           |
| 5         | <i>i</i> Pr       | Allyl                    | Yb(OTf) <sub>3</sub>        | MeCN                   | 25        | 30             | 60:40       |
| 6         | <i>i</i> Pr       | Allyl                    | Yb(OTf) <sub>3</sub>        | CHCl <sub>3</sub>      | 25        | -              | -           |
| 7         | <i>i</i> Pr       | Allyl                    | Yb(OTf) <sub>3</sub>        | HFB                    | 25        | 20             | 87:13       |
| 8         | <i>i</i> Pr       | Allyl <sup>b</sup>       | Yb(OTf) <sub>3</sub>        | HFB                    | 25        | 50             | 87:13       |
| 9         | <i>i</i> Pr       | Allyl                    | THTO                        | HFB                    | 25        | 48             | 87:13       |
| 10        | <i>i</i> Pr       | Allyl                    | PPh <sub>3</sub> oxide      | HFB                    | 25        | n.r.           | -           |
| 11        | <i>i</i> Pr       | Allyl                    | Phenol                      | HFB                    | 25        | n.r.           | -           |
| 12        | <i>i</i> Pr       | Allyl                    | PPh <sub>3</sub>            | HFB                    | 25        | n.r.           | -           |
| 13        | <i>i</i> Pr       | Allyl                    | DMSO                        | HFB                    | 25        | 21             | 85:15       |
| 14        | <i>i</i> Pr       | TMSCl                    | THTO                        | HFB                    | 25        | 10             | -           |
| 15        | <i>i</i> Pr       | TMS-SiMe <sub>2</sub> Cl | THTO                        | HFB                    | 25        | n.r.           | -           |
| 16        | <i>i</i> Pr       | TBACl                    | THTO                        | HFB                    | 25        | n.r.           | -           |
| 17        | <i>i</i> Pr       | PhSiCl <sub>3</sub>      | THTO                        | HFB                    | 25        | 47             | 86:14       |
| 18        | <i>i</i> Pr       | SiCl <sub>4</sub>        | THTO                        | HFB                    | 25        | 25             | 86:14       |
| 19        | <i>i</i> Pr       | Allyl <sup>b</sup>       | THTO                        | HFB                    | 4         | 87             | 80:20       |
| 20        | <i>i</i> Pr       | Allyl <sup>b</sup>       | THTO                        | HFB                    | 25        | 100            | 80:20       |
| 21        | <i>i</i> Pr       | Allyl <sup>b</sup>       | THTO                        | Hexane                 | 25        | 100            | 66:34       |
| 22        | <i>i</i> Pr       | Allyl <sup>b</sup>       | THTO                        | 1,2-DCB                | 25        | 100            | 60:40       |
| 23        | <i>i</i> Pr       | Allyl <sup>b</sup>       | THTO                        | DCM                    | -78       | 15             | 60:40       |
| 24        | <i>i</i> Pr       | Allyl <sup>b</sup>       | THTO                        | DCM:HFB (3:1)          | -78       | 80             | 70:30       |
| 25        | Ph                | Allyl <sup>b</sup>       | THTO                        | HFB                    | 25        | 100            | 80:20       |
| 26        | Ph                | Allyl <sup>b</sup>       | Yb(OTf) <sub>3</sub>        | HFB                    | 25        | 50             | 80:20       |
| 27        | <i>t</i> Bu       | Allyl <sup>b</sup>       | THTO                        | HFB                    | 25        | 100            | 87:13       |
| 28        | <i>t</i> Bu       | Allyl <sup>b</sup>       | THTO + Yb(OTf) <sub>3</sub> | HFB                    | 25        | 100            | 91:9        |
| 29        | <i>t</i> Bu       | Allyl <sup>b</sup>       | Yb(OTf) <sub>3</sub>        | HFB                    | 25        | 22             | 93:7        |
| 30        | <i>t</i> Bu       | Allyl <sup>b</sup>       | THTO                        | HFB <sup>c</sup>       | 25        | 80             | 95:5        |
| 31        | <i>t</i> Bu       | Allyl <sup>b</sup>       | Yb(OTf) <sub>3</sub>        | HFB <sup>c</sup>       | 25        | 20             | 95:5        |
| 32        | <i>t</i> Bu       | Allyl <sup>d</sup>       | THTO                        | HFB                    | 25        | 78             | 95:5        |
| 33        | <i>t</i> Bu       | Allyl <sup>d</sup>       | THTO                        | HFB <sup>e</sup>       | 25        | 82             | 94:6        |
| 34        | <i>t</i> Bu       | Allyl <sup>d</sup>       | THTO                        | HFB <sup>f</sup>       | 25        | 81             | 92:8        |
| <b>35</b> | <b><i>t</i>Bu</b> | <b>Allyl<sup>g</sup></b> | <b>THTO</b>                 | <b>HFB<sup>c</sup></b> | <b>25</b> | <b>94 (82)</b> | <b>96:4</b> |
| 36        | <i>t</i> Bu       | Allyl <sup>g</sup>       | THTO                        | DCM <sup>c</sup>       | 25        | 95             | 92:8        |

|    |             |                    |      |                      |    |      |       |
|----|-------------|--------------------|------|----------------------|----|------|-------|
| 37 | <i>t</i> Bu | Allyl <sup>g</sup> | THTO | THF <sup>c</sup>     | 25 | n.r. | -     |
| 38 | <i>t</i> Bu | Allyl <sup>g</sup> | THTO | Toluene <sup>c</sup> | 25 | 82   | 95:5  |
| 39 | <i>t</i> Bu | Allyl <sup>g</sup> | THTO | MeCN <sup>c</sup>    | 25 | 80   | 75:25 |
| 40 | <i>t</i> Bu | Allyl <sup>g</sup> | -    | HFB <sup>c</sup>     | 25 | n.r. | -     |

<sup>a</sup> Standard conditions: 0.1 mmol of Michael acceptor, 0.1 mmol of silane and Yb(OTf)<sub>3</sub> (20mol%) or THTO (0.1 mmol) in 1.2 mL of solvent were used. <sup>b</sup> 3 equivalents of silane and THTO were used. <sup>c</sup> 2.5 mL of solvent were used. <sup>d</sup> 2 equivalents of allyltrichlorosilane and THTO were used. <sup>e</sup> 0.9 mL of HFB were used. <sup>f</sup> 0.6 mL of HFB were used. <sup>g</sup> 4 equivalents of silane and THTO were used.

## 2.2. Optimization of the $\beta$ -bromination reaction.<sup>a</sup>

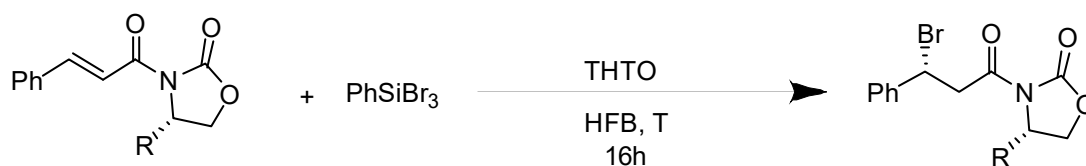

| Entry | R           | PhSiBr <sub>3</sub> (eq.) | HFB (mL) | T (°C) | Conversion (%) | d.r.  |
|-------|-------------|---------------------------|----------|--------|----------------|-------|
| 1     | <i>i</i> Pr | 3                         | 2.5      | 25     | 82             | 80:20 |
| 2     | <i>t</i> Bu | 4                         | 2.5      | 25     | 95 (81)        | 90:10 |
| 3     | <i>t</i> Bu | 3                         | 2.5      | 25     | 97             | 87:13 |
| 4     | <i>t</i> Bu | 3                         | 2.5      | 4      | 17             | >95:5 |
| 5     | <i>t</i> Bu | 2                         | 2.5      | 25     | 50             | 91:9  |
| 6     | <i>t</i> Bu | 2                         | 1.8      | 25     | 60             | 91:9  |

<sup>a</sup> Standard conditions: 0.1 mmol of Michael acceptor, 0.3 mmol of tribromo(phenyl)silane and THTO (0.3 mmol) in 2.5 mL of hexafluorobenzene were used.

### 3. Synthesis and characterization data of $\alpha,\beta$ -unsaturated *N*-acyloxazolidinones 1.

#### 3.1. General procedure A: Synthesis of $\alpha,\beta$ -unsaturated *N*-acyloxazolidinones 1.

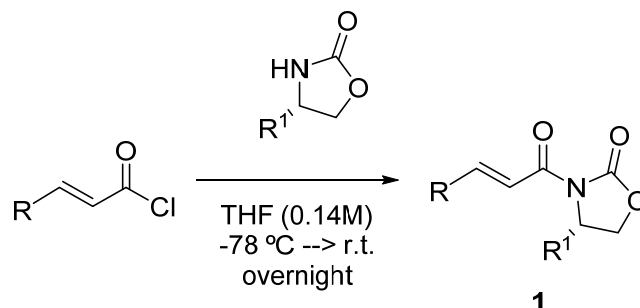

A previously oven-dried round bottom flask was charged with a magnetic stirrer and the corresponding oxazolidinone (1.4 mmol, 1.0 eq.)<sup>2</sup> under nitrogen atmosphere. Then, anhydrous THF (5 mL) was added. The reaction mixture was cooled to -78 °C and *n*-BuLi (2.5M in hexanes, 1.1 eq.) was added dropwise. The reaction mixture was allowed to get room temperature and stirred for 1h. The solution was cooled again to -78 °C and another solution of the corresponding  $\alpha,\beta$ -unsaturated acyl chloride (1.4 mmol, 1.0 eq.) in anhydrous THF (5 mL) was added dropwise under nitrogen atmosphere. The reaction mixture was stirred overnight at room temperature. The mixture was quenched with saturated NH<sub>4</sub>Cl (aq) and the aqueous phases were extracted with EtOAc (2 x 5 mL). The organic phases were combined and dried over MgSO<sub>4</sub>, filtered and concentrated under reduced pressure. The crude mixture was purified by column chromatography using silica gel and the eluent indicated in each case.

#### 3.2. General procedure B: Synthesis of $\alpha,\beta$ -unsaturated *N*-acyloxazolidinones 1.

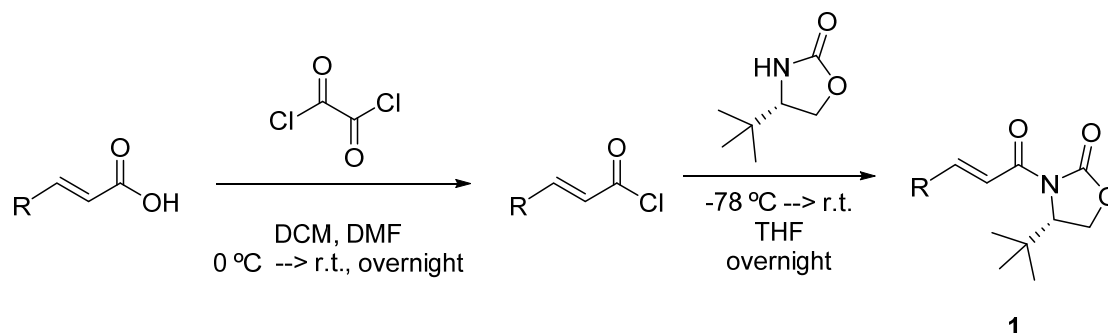

It was prepared following a modified procedure described in the literature:<sup>3</sup> A previously oven-dried round bottom flask was charged with a magnetic stirrer and the corresponding  $\alpha,\beta$

<sup>2</sup> They were prepared following a procedure described in the literature: A.-R. Silva, V. Guimaraes, A.-P. Carvalho and J. Pires, *Catal. Sci. Technol.* 2013, **3**, 659.

<sup>3</sup> W. Zhi, J. Li, D. Zou, Y. Wu and Y. Wu, *J. Org. Chem.* 2017, **82**, 12286.

unsaturated carboxylic acid (1.2 eq.) under nitrogen atmosphere. Then, DCM (3 mL) was added and the reaction mixture was cooled to 0 °C. Oxalylchloride (1.2 eq.) was added dropwise, followed by the addition of two drops of DMF, and the reaction mixture was stirred overnight at room temperature. Then, the solvent was evaporated under reduced pressure and the crude mixture was redissolved in anhydrous THF (5 mL). Another round bottom flask previously oven-dried was charged with a magnetic stirrer and the (*S*)-4-(*tert*-butyl)oxazolidin-2-one (1.0 eq.) under nitrogen atmosphere. Then, anhydrous THF (5 mL) was added, the reaction mixture was cooled to -78 °C and *n*-BuLi (2.5M in hexanes, 1.1 eq.) was added dropwise. The reaction mixture was allowed to get room temperature and stirred for 1h. The solution was cooled again to -78 °C and another solution of the corresponding  $\alpha,\beta$ -unsaturated acyl chloride solution previously prepared (1.2 eq.) was added dropwise under nitrogen atmosphere and the reaction mixture was stirred overnight at room temperature. The mixture was quenched with saturated NH<sub>4</sub>Cl (aq) and the aqueous phases were extracted with EtOAc (2 x 5 mL). The organic phases were combined and dried over MgSO<sub>4</sub>, filtered and concentrated under reduced pressure. The crude mixture was purified by column chromatography using silica gel and the eluent indicated in each case.

#### (*S,E*)-3-(But-2-enoyl)-4-isopropylloxazolidin-2-one (**1a**)<sup>3</sup>

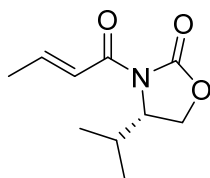

Following general procedure A, crotonoyl chloride (0.13 mL, 1.4 mmol, 1.0 eq.), (*S*)-4-isopropylloxazolidin-2-one (181 mg, 1.4 mmol, 1.0 eq.) and *n*-BuLi (0.61 mL, 1.54 mmol, 1.1 eq.), gave **1a** as a yellow oil (88% yield). Eluent: cyclohexane: ethyl acetate from 95:5 to 3:1. The <sup>1</sup>H-NMR is in accordance with the literature.

<sup>1</sup>H-NMR:  $\delta$  7.26 (m, 1H), 7.12 (m, 1H), 4.47 (m, 1H), 4.29 (t, *J* = 8.8 Hz, 1H), 4.22 (dd, *J* = 7.2, 3.2 Hz, 1H), 2.40 (m, 1H), 1.95 (dd, *J* = 6.8, 1.6 Hz, 3H), 0.92 (dd, *J* = 17.6, 7.2 Hz, 6H) ppm.

#### (*S,E*)-3-(But-2-enoyl)-4-phenylloxazolidin-2-one (**SI1**)<sup>3</sup>

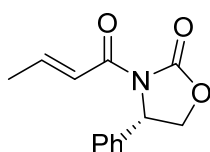

Following general procedure A, crotonoyl chloride (0.13 mL, 1.4 mmol, 1.0 eq.), (*S*)-4-phenylloxazolidin-2-one (228 mg, 1.4 mmol, 1.0 eq.) and *n*-BuLi (0.61 mL, 1.54 mmol, 1.1 eq.), gave **SI1** as a white solid (77% yield). Eluent: cyclohexane: ethyl acetate from 95:5 to 2:1. The <sup>1</sup>H-NMR is in accordance with the literature.

<sup>1</sup>H-NMR:  $\delta$  7.43 – 7.25 (m, 6H), 7.10 (dq, *J* = 15.2, 6.8 Hz, 1H), 5.49 (dd, *J* = 8.7, 3.9 Hz, 1H), 4.70 (t, *J* = 8.8 Hz, 1H), 4.28 (dd, *J* = 8.9, 3.9 Hz, 1H), 1.94 (dd, *J* = 6.8, 1.5 Hz, 3H) ppm.

### (*S,E*)-3-(But-2-enoyl)-4-(*tert*-butyl)oxazolidin-2-one (**1b**)<sup>3</sup>

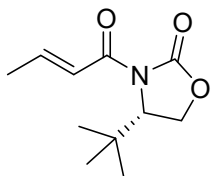

Following general procedure A, crotonoyl chloride (0.13 mL, 1.4 mmol, 1.0 eq.), (*S*)-4-(*tert*-butyl)oxazolidin-2-one (200 mg, 1.4 mmol, 1.0 eq.) and *n*-BuLi (0.61 mL, 1.54 mmol, 1.1 eq.), gave **1b** as a white solid (81% yield).

Eluent: cyclohexane: ethyl acetate from 95:5 to 2:1. The <sup>1</sup>H-NMR is in accordance with the literature.

<sup>1</sup>H-NMR: δ 7.31 – 7.25 (m, 1H), 7.21 – 7.07 (m, 1H), 4.51 (dd, *J* = 7.2, 2.1 Hz, 1H), 4.32 – 4.20 (m, 2H), 1.96 (dd, *J* = 6.6, 1.4 Hz, 3H), 0.93 (s, 9H) ppm.

### (*S,E*)-4-(*tert*-Butyl)-3-(pent-2-enoyl)oxazolidin-2-one (**1c**)

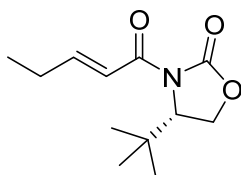

Following general procedure B, (*E*)-pent-2-enoic acid (0.14 mL, 1.25 mmol, 1.2 eq.), oxalyl chloride (0.11 mL, 1.25 mmol, 1.2 eq.), (*S*)-4-(*tert*-butyl)oxazolidin-2-one (150 mg, 1.05 mmol, 1.0 eq.) and *n*-BuLi (0.5 mL, 1.15 mmol, 1.1 eq.), gave **1c** as a yellow oil (56% yield). Eluent:

cyclohexane: ethyl acetate from 95:5 to 2:1.  $[\alpha]_D^{20} = +85.3$  (*c* 1.07, CHCl<sub>3</sub>).

<sup>1</sup>H-NMR: δ 7.31 – 7.13 (m, 2H), 4.52 (dd, *J* = 7.2, 2.1 Hz, 1H), 4.33 – 4.20 (m, 2H), 2.39 – 2.24 (m, 2H), 1.11 (t, *J* = 7.4 Hz, 3H), 0.95 (s, 9H) ppm.

<sup>13</sup>C-NMR: δ 165.5, 154.7, 152.9, 119.6, 65.2, 60.8, 35.9, 25.8, 25.6, 12.2 ppm.

HRMS (ESI<sup>+</sup>): calculated for C<sub>12</sub>H<sub>20</sub>NO<sub>3</sub> [M+H]<sup>+</sup>: 226.1438; found: 226.1451.

### (*S,E*)-4-(*tert*-Butyl)-3-(oct-2-enoyl)oxazolidin-2-one (**1d**)

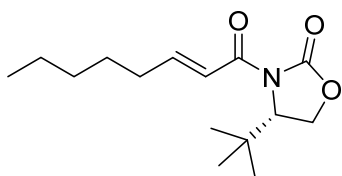

Following general procedure B, (*E*)-oct-2-enoic acid (0.19 mL, 1.25 mmol, 1.2 eq.), oxalyl chloride (0.11 mL, 1.25 mmol, 1.2 eq.), (*S*)-4-(*tert*-butyl)oxazolidin-2-one (150 mg, 1.05 mmol, 1.0 eq.) and *n*-BuLi (0.5 mL, 1.15 mmol, 1.1 eq.), gave **1d** as a yellow oil

(90% yield). Eluent: cyclohexane: ethyl acetate 4:1.  $[\alpha]_D^{20} = +69.9$  (*c* 1.21, CHCl<sub>3</sub>).

<sup>1</sup>H-NMR: δ 7.30 – 7.09 (m, 2H), 4.52 (dd, *J* = 7.2, 2.0 Hz, 1H), 4.33 – 4.19 (m, 2H), 2.33 – 2.23 (m, 2H), 1.57 – 1.43 (m, 2H), 1.39 – 1.27 (m, 4H), 0.95 (s, 9H), 0.92 – 0.86 (m, 3H) ppm.

<sup>13</sup>C-NMR: δ 165.5, 154.7, 151.8, 120.3, 65.2, 60.8, 35.9, 32.7, 31.4, 27.7, 25.6, 22.4, 13.9 ppm.

HRMS (ESI<sup>+</sup>): calculated for C<sub>15</sub>H<sub>26</sub>NO<sub>3</sub> [M+H]<sup>+</sup>: 268.1907; found: 268.1920.

**(*S,E*)-4-(*tert*-Butyl)-3-(4-methylpent-2-enoyl)oxazolidin-2-one (**1e**)<sup>3</sup>**

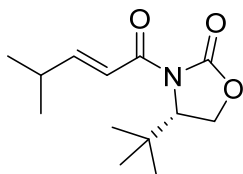

Following general procedure B, (*E*)-4-methylpent-2-enoic acid (0.15 mL, 1.25 mmol, 1.2 eq.), oxalyl chloride (0.11 mL, 1.25 mmol, 1.2 eq.), (*S*)-4-(*tert*-butyl)oxazolidin-2-one (150 mg, 1.05 mmol, 1.0 eq.) and *n*-BuLi (0.5 mL, 1.15 mmol, 1.1 eq.), gave **1e** as a yellow oil (62% yield). Eluent: cyclohexane: ethyl acetate from 95:5 to 2:1. The <sup>1</sup>H-NMR is in accordance with the literature.

<sup>1</sup>H-NMR: δ 7.26 – 7.05 (m, 2H), 4.52 (dd, *J* = 7.3, 1.9 Hz, 1H), 4.33 – 4.19 (m, 2H), 2.62 – 2.47 (m, 1H), 1.10 (d, *J* = 6.8 Hz, 6H), 0.95 (s, 9H) ppm.

**(*S*)-4-(*tert*-Butyl)-3-cinnamoyloxazolidin-2-one (**1f**)**

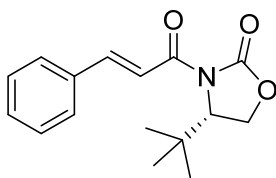

Following general procedure A, cinnamoyl chloride (233 mg, 1.4 mmol, 1.0 eq.), (*S*)-4-(*tert*-butyl)oxazolidin-2-one (200 mg, 1.4 mmol, 1.0 eq.) and *n*-BuLi (0.61 mL, 1.54 mmol, 1.1 eq.), gave **1f** as a yellow solid (97% yield). Eluent: cyclohexane: ethyl acetate from 95:5 to 3:1. [α]<sub>D</sub><sup>20</sup> = +117.2 (c 1.07, CHCl<sub>3</sub>).

<sup>1</sup>H-NMR: δ 7.95 (d, *J* = 15.7 Hz, 1H), 7.84 (d, *J* = 15.7 Hz, 1H), 7.67 – 7.58 (m, 2H), 7.43 – 7.34 (m, 3H), 4.59 (dd, *J* = 7.0, 2.2 Hz, 1H), 4.38 – 4.23 (m, 2H), 0.97 (s, 9H) ppm.

<sup>13</sup>C-NMR: δ 165.5, 154.7, 146.3, 134.6, 130.6, 128.8, 128.6, 117.1, 65.2, 61.0, 36.0, 25.6 ppm.

HRMS (ESI<sup>+</sup>): calculated for C<sub>16</sub>H<sub>20</sub>NO<sub>3</sub> [M+H]<sup>+</sup>: 274.1438; found: 274.1451.

**(*S,E*)-4-(*tert*-Butyl)-3-(3-(4-nitrophenyl)acryloyl)oxazolidin-2-one (**1g**)**

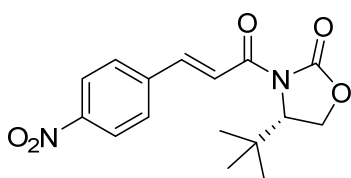

Following general procedure A, (*E*)-3-(4-nitrophenyl)acryloyl chloride (296 mg, 1.4 mmol, 1.0 eq.), (*S*)-4-(*tert*-butyl)oxazolidin-2-one (200 mg, 1.4 mmol, 1.0 eq.) and *n*-BuLi (0.61 mL, 1.54 mmol, 1.1 eq.), gave **1g** as a yellow solid (93% yield). Eluent: cyclohexane: ethyl acetate 7:3. [α]<sub>D</sub><sup>20</sup> = +114.4 (c 1.03, CHCl<sub>3</sub>).

<sup>1</sup>H-NMR: δ 8.24 (d, *J* = 8.8 Hz, 2H), 8.06 (d, *J* = 15.7 Hz, 1H), 7.82 (d, *J* = 15.7 Hz, 1H), 7.75 (d, *J* = 8.8 Hz, 2H), 4.58 (dd, *J* = 6.9, 2.3 Hz, 1H), 4.40 – 4.27 (m, 2H), 0.97 (s, 9H) ppm.



<sup>13</sup>C-NMR: δ 164.7, 154.7, 148.6, 142.9, 140.7, 129.0, 124.1, 121.4, 65.4, 61.1, 36.0, 25.6 ppm.

HRMS (ESI<sup>+</sup>): calculated for C<sub>16</sub>H<sub>19</sub>N<sub>2</sub>O<sub>5</sub> [M+H]<sup>+</sup>: 319.1288; found: 319.1262.

**(*S,E*)-4-(*tert*-Butyl)-3-(3-(2-chlorophenyl)acryloyl)oxazolidin-2-one (**1h**)**

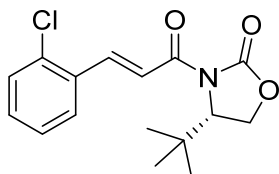

Following general procedure A, (*E*)-3-(2-chlorophenyl)acryloyl chloride (281 mg, 1.4 mmol, 1.0 eq.), (*S*)-4-(*tert*-butyl)oxazolidin-2-one (200 mg, 1.4 mmol, 1.0 eq.) and *n*-BuLi (0.61 mL, 1.54 mmol, 1.1 eq.), gave **1h** as a yellow oil (87% yield). Eluent: cyclohexane: ethyl acetate 7:3.

[α]<sub>D</sub><sup>20</sup> = +100.1 (c 1.05, CHCl<sub>3</sub>).

<sup>1</sup>H-NMR: δ 8.25 (d, *J* = 15.7 Hz, 1H), 7.94 (d, *J* = 15.7 Hz, 1H), 7.81 – 7.73 (m, 1H), 7.44 – 7.38 (m, 1H), 7.36 – 7.24 (m, 2H), 4.59 (dd, *J* = 6.7, 2.6 Hz, 1H), 4.38 – 4.27 (m, 2H), 0.98 (s, 9H) ppm.

<sup>13</sup>C-NMR: δ 164.9, 154.6, 141.5, 135.1, 132.7, 131.2, 130.0, 128.0, 127.0, 119.6, 65.2, 60.9, 35.8, 25.5 ppm.

HRMS (ESI<sup>+</sup>): calculated for C<sub>16</sub>H<sub>19</sub>ClNO<sub>3</sub> [M+H]<sup>+</sup>: 308.1048; found: 308.1065.

**(*S,E*)-4-(*tert*-Butyl)-3-(3-(4-chlorophenyl)acryloyl)oxazolidin-2-one (**1i**)**

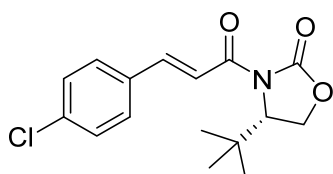

Following general procedure B, (*E*)-3-(4-chlorophenyl)acrylic acid (307 mg, 1.68 mmol, 1.2 eq.), oxalyl chloride (0.15 mL, 1.68 mmol, 1.2 eq.), (*S*)-4-(*tert*-butyl)oxazolidin-2-one (200 mg, 1.4 mmol, 1.0 eq.) and *n*-BuLi (0.61 mL, 1.54 mmol, 1.1 eq.), gave **1i** as a yellow solid (66% yield). Eluent: cyclohexane: ethyl acetate from 95:5 to 3:1. [α]<sub>D</sub><sup>20</sup> = +111.8 (c 1.46, CHCl<sub>3</sub>).

[α]<sub>D</sub><sup>20</sup> = +111.8 (c 1.46, CHCl<sub>3</sub>).

<sup>1</sup>H-NMR: δ 7.93 (d, *J* = 15.7 Hz, 1H), 7.78 (d, *J* = 15.7 Hz, 1H), 7.55 (d, *J* = 8.4 Hz, 2H), 7.37 (d, *J* = 8.4 Hz, 2H), 4.59 (dd, *J* = 7.0, 2.3 Hz, 1H), 4.39 – 4.22 (m, 2H), 0.98 (s, 9H) ppm.

<sup>13</sup>C-NMR: δ 165.3, 154.7, 144.8, 136.5, 133.1, 129.7, 129.1, 117.7, 65.3, 61.0, 36.0, 25.6 ppm.

HRMS (ESI<sup>+</sup>): calculated for C<sub>16</sub>H<sub>19</sub>ClNO<sub>3</sub> [M+H]<sup>+</sup>: 308.1048; found: 308.1061.

**(*S,E*)-4-(*tert*-Butyl)-3-(3-(4-fluorophenyl)acryloyl)oxazolidin-2-one (**1j**)**

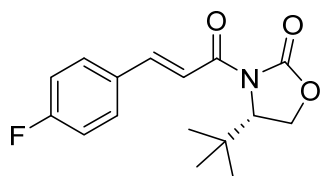

Following general procedure A, (*E*)-3-(4-fluorophenyl)acryloyl chloride (260 mg, 1.4 mmol, 1.0 eq.), (*S*)-4-(*tert*-butyl)oxazolidin-2-one (200 mg, 1.4 mmol, 1.0 eq.) and *n*-BuLi (0.61 mL, 1.54 mmol, 1.1 eq.), gave **1j** as a yellow solid (59% yield). Eluent: cyclohexane:

ethyl acetate from 95:5 to 3:1.  $[\alpha]_D^{20} = +113.1$  (*c* 0.64, CHCl<sub>3</sub>).

**<sup>1</sup>H-NMR:** δ 7.88 (d, *J* = 15.7 Hz, 1H), 7.79 (d, *J* = 15.7 Hz, 1H), 7.66 – 7.57 (m, 2H), 7.13 – 7.02 (m, 2H), 4.58 (dd, *J* = 7.1, 2.2 Hz, 1H), 4.41 – 4.21 (m, 2H), 0.98 (s, 9H) ppm.

**<sup>13</sup>C-NMR:** δ 165.4, 164.1 (d, *J* = 251.8 Hz), 154.7, 145.0, 130.9 (d, *J* = 3.4 Hz), 130.5 (d, *J* = 8.6 Hz), 116.9 (d, *J* = 2.5 Hz), 116.0 (d, *J* = 22.0 Hz), 65.3, 61.0, 36.0, 25.6 ppm.

**<sup>19</sup>F-NMR:** δ -109.0 ppm.

**HRMS (ESI<sup>+</sup>):** calculated for C<sub>16</sub>H<sub>19</sub>FNO<sub>3</sub> [M+H]<sup>+</sup>: 292.1343; found: 292.1360.

**(*S,E*)-4-(*tert*-Butyl)-3-(3-(3-methoxyphenyl)acryloyl)oxazolidin-2-one (**1k**)**

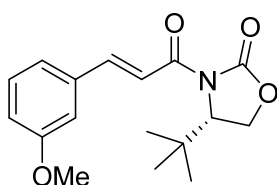

Following general procedure B, (*E*)-3-(3-methoxyphenyl)acrylic acid (299 mg, 1.68 mmol, 1.2 eq.), oxalyl chloride (0.15 mL, 1.68 mmol, 1.2 eq.), (*S*)-4-(*tert*-butyl)oxazolidin-2-one (200 mg, 1.4 mmol, 1.0 eq.) and *n*-BuLi (0.61 mL, 1.54 mmol, 1.1 eq.), gave **1k** as a yellow oil (88%

yield). Eluent: cyclohexane: ethyl acetate 7:3.  $[\alpha]_D^{20} = +87.9$  (*c* 1.04, CHCl<sub>3</sub>).

**<sup>1</sup>H-NMR:** δ 7.93 (d, *J* = 15.7 Hz, 1H), 7.80 (d, *J* = 15.7 Hz, 1H), 7.36 – 7.18 (m, 2H), 7.14 – 7.09 (m, 1H), 6.99 – 6.89 (m, 1H), 4.58 (dd, *J* = 7.0, 2.3 Hz, 1H), 4.37 – 4.21 (m, 2H), 3.84 (s, 3H), 0.97 (s, 9H) ppm.

**<sup>13</sup>C-NMR:** δ 165.5, 159.9, 154.7, 146.3, 136.0, 129.8, 121.3, 117.4, 116.6, 113.3, 65.3, 61.0, 55.3, 36.0, 25.7 ppm.

**HRMS (ESI<sup>+</sup>):** calculated for C<sub>17</sub>H<sub>22</sub>NO<sub>4</sub> [M+H]<sup>+</sup>: 304.1543; found: 304.1564.

**(*S,E*)-4-(*tert*-Butyl)-3-(3-(4-methoxyphenyl)acryloyl)oxazolidin-2-one (**1l**)**

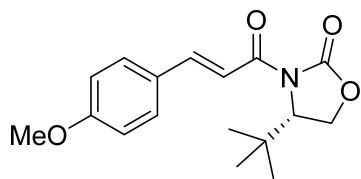

Following general procedure B, (*E*)-3-(4-methoxyphenyl)acrylic acid (299 mg, 1.68 mmol, 1.2 eq.), oxalyl chloride (0.15 mL, 1.68 mmol, 1.2 eq.), (*S*)-4-(*tert*-butyl)oxazolidin-2-one (200 mg, 1.4 mmol, 1.0 eq.) and *n*-BuLi (0.61 mL, 1.54 mmol, 1.1 eq.), gave **1l**

as a yellow oil (68% yield). Eluent: cyclohexane: ethyl acetate from 95:5 to 3:1.  $[\alpha]_D^{20} = +122.2$  (c 0.93, CHCl<sub>3</sub>).

**<sup>1</sup>H-NMR:** δ 7.81 (s, 2H), 7.57 (d, *J* = 8.8 Hz, 2H), 6.90 (d, *J* = 8.8 Hz, 2H), 4.58 (dd, *J* = 7.0, 2.3 Hz, 1H), 4.35 – 4.22 (m, 2H), 3.84 (s, 3H), 0.97 (s, 9H) ppm.

**<sup>13</sup>C-NMR:** δ 165.7, 161.7, 154.8, 146.2, 130.4, 127.4, 114.6, 114.3, 65.2, 60.9, 55.4, 36.0, 25.6 ppm.

**HRMS (ESI<sup>+</sup>):** calculated for C<sub>17</sub>H<sub>22</sub>NO<sub>4</sub> [M+H]<sup>+</sup>: 304.1543; found: 304.1552.

**(*S,E*)-4-(*tert*-Butyl)-3-(2-methylpent-2-enoyl)oxazolidin-2-one (**1m**)**

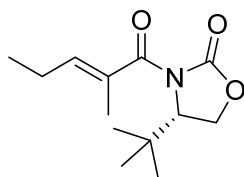

Following general procedure B, (*E*)-2-methylpent-2-enoic acid (192 mg, 1.68 mmol, 1.2 eq.), oxalyl chloride (0.15 mL, 1.68 mmol, 1.2 eq.), (*S*)-4-(*tert*-butyl)oxazolidin-2-one (200 mg, 1.4 mmol, 1.0 eq.) and *n*-BuLi (0.61 mL, 1.54 mmol, 1.1 eq.), gave **1m** as a yellow oil (79% yield). Eluent:

cyclohexane: ethyl acetate 4:1.  $[\alpha]_D^{20} = +16.6$  (c 0.31, CHCl<sub>3</sub>).

**<sup>1</sup>H-NMR:** δ 6.27 – 6.17 (m, 1H), 4.57 (dd, *J* = 6.6, 4.6 Hz, 1H), 4.32 – 4.24 (m, 2H), 2.29 – 2.19 (m, 2H), 1.95 – 1.90 (m, 3H), 1.06 (t, *J* = 7.6 Hz, 3H), 0.94 (s, 9H) ppm.

**<sup>13</sup>C-NMR:** δ 172.3, 154.0, 142.9, 130.0, 64.7, 60.3, 35.8, 25.4, 21.9, 13.5, 12.8 ppm.

**HRMS (ESI<sup>+</sup>):** calculated for C<sub>13</sub>H<sub>21</sub>NO<sub>3</sub>Na [M+Na]<sup>+</sup>: 262.1413; found: 262.1419.

#### 4. General procedure C for the nucleophilic halogenation of $\alpha,\beta$ -unsaturated *N*-acyloxazolidinones. Synthesis of **3** and **4**.

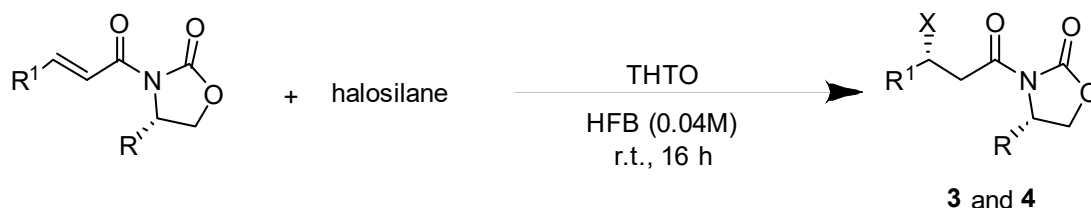

The corresponding  $\alpha,\beta$ -unsaturated *N*-acyloxazolidinone **1** (0.1 mmol, 1.0 eq.) was dissolved in hexafluorobenzene (2.5 mL) in a vial. Then, tetrahydrothiophene 1-oxide (40  $\mu\text{L}$ , 0.4 mmol, 4.0 eq.) and the corresponding halosilane<sup>4</sup> (0.4 mmol, 4.0 eq.) were sequentially added and the reaction was stirred for 16 hours. Finally, the crude mixture was purified by flash column chromatography using latrobeads silica gel and eluting with the solvent indicated in each case.

##### (*S*)-4-(*tert*-Butyl)-3-((*S*)-3-chlorobutanoyl)oxazolidin-2-one (**3b**)

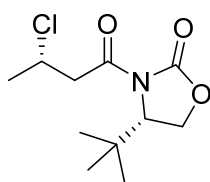

Following general procedure C, (*S,E*)-3-(but-2-enoyl)-4-(*tert*-butyl)oxazolidin-2-one **1b** (21.1 mg, 0.1 mmol, 1.0 eq.), tetrahydrothiophene 1-oxide (40  $\mu\text{L}$ , 0.4 mmol, 4.0 eq.) and allyltrichlorosilane (60  $\mu\text{L}$ , 0.4 mmol, 0.4 eq.), gave **3b** as a colorless oil (82% yield). Eluent: cyclohexane: ethyl acetate 4:1.  $[\alpha]_D^{20} = +53.9$  (*c* 0.98,  $\text{CHCl}_3$ ).

<sup>1</sup>H-NMR:  $\delta$  4.63 – 4.50 (m, 1H), 4.46 (dd, *J* = 7.1, 2.0 Hz, 1H), 4.37 – 4.21 (m, 2H), 3.44 (dd, *J* = 16.8, 8.8 Hz, 1H), 3.30 (dd, *J* = 16.7, 4.5 Hz, 1H), 1.62 (d, *J* = 6.5 Hz, 3H), 0.94 (s, 9H) ppm.

<sup>13</sup>C-NMR:  $\delta$  169.6, 154.6, 65.6, 61.1, 52.9, 45.7, 35.8, 25.7, 25.2 ppm.

HRMS (ESI<sup>+</sup>): calculated for  $\text{C}_{11}\text{H}_{19}\text{NO}_3\text{Cl}$  [*M*+*H*]<sup>+</sup>: 248.1048; found: 248.1058.

##### (*S*)-4-(*tert*-Butyl)-3-((*S*)-3-chloropentanoyl)oxazolidin-2-one (**3c**)

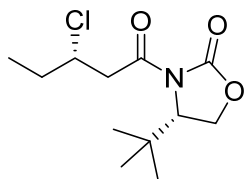

Following general procedure C, (*S,E*)-4-(*tert*-butyl)-3-(pent-2-enoyl)oxazolidin-2-one **1c** (22.5 mg, 0.1 mmol, 1.0 eq.), tetrahydrothiophene 1-oxide (40  $\mu\text{L}$ , 0.4 mmol, 4.0 eq.) and

<sup>4</sup> Tribromo(phenyl)silane was prepared following a reported procedure: A. Iwataa, Y. Toyoshimaa, T. Hayashidaa, T. Ochia, A. Kunaia and J. Ohshita, *J. Organomet. Chem.*, 2003, **667**, 90.

allyltrichlorosilane (60  $\mu$ L, 0.4 mmol, 0.4 eq.), gave **3c** as a yellow oil (76% yield). Eluent: cyclohexane: ethyl acetate from 9:1 to 3:1.  $[\alpha]_D^{20} = +49.1$  (c 0.35,  $\text{CHCl}_3$ ).

$^1\text{H-NMR}$ :  $\delta$  4.46 (dd,  $J = 7.1, 2.1$  Hz, 1H), 4.44 – 4.34 (m, 1H), 4.34 – 4.22 (m, 2H), 3.44 (dd,  $J = 16.6, 9.2$  Hz, 1H), 3.30 (dd,  $J = 16.6, 4.0$  Hz, 1H), 1.98 – 1.75 (m, 2H), 1.08 (t,  $J = 7.3$  Hz, 3H), 0.95 (s, 9H) ppm.

$^{13}\text{C-NMR}$ :  $\delta$  169.8, 154.7, 65.6, 61.1, 59.4, 43.9, 35.8, 31.4, 25.7, 10.8 ppm.

**HRMS (ESI<sup>+</sup>)**: calculated for  $\text{C}_{12}\text{H}_{21}\text{NO}_3\text{Cl}$   $[\text{M}+\text{H}]^+$ : 262.1205; found: 262.1215.

#### **(S)-4-(tert-Butyl)-3-((S)-3-chlorooctanoyl)oxazolidin-2-one (3d)**

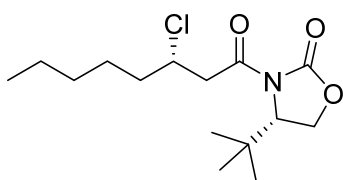

Following general procedure C, (*S,E*)-4-(*tert*-butyl)-3-(oct-2-enoyl)oxazolidin-2-one **1d** (26.7 mg, 0.1 mmol, 1.0 eq.), tetrahydrothiophene 1-oxide (40  $\mu$ L, 0.4 mmol, 4.0 eq.) and allyltrichlorosilane (60  $\mu$ L, 0.4 mmol, 0.4 eq.), gave **3d** as a yellow oil (83% yield, 92:8 *dr*). Eluent: cyclohexane: ethyl acetate 4:1.  $[\alpha]_D^{20} = +25.8$  (c 0.78,  $\text{CHCl}_3$ ).

$^1\text{H-NMR}$ :  $\delta$  4.51 – 4.38 (m, 2H), 4.34 – 4.22 (m, 2H), 3.44 (dd,  $J = 16.6, 9.2$  Hz, 1H), 3.29 (dd,  $J = 16.6, 4.0$  Hz, 1H), 1.87 – 1.74 (m, 2H), 1.66 – 1.40 (m, 2H), 1.40 – 1.24 (m, 4H), 0.95 (s, 9H), 0.93 – 0.86 (m, 3H) ppm.

$^{13}\text{C-NMR}$ :  $\delta$  169.8, 154.7, 65.6, 61.1, 58.0, 44.2, 38.2, 35.8, 31.2, 25.7, 25.6, 22.5, 13.9 ppm.

**HRMS (ESI<sup>+</sup>)**: calculated for  $\text{C}_{15}\text{H}_{27}\text{NO}_3\text{Cl}$   $[\text{M}+\text{H}]^+$ : 292.0543; found: 292.0531.

#### **(S)-4-(tert-butyl)-3-((R)-3-chloro-4-methylpentanoyl)oxazolidin-2-one (3e)**

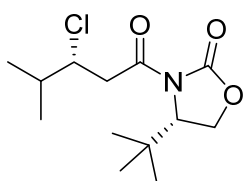

Following general procedure C, (*S,E*)-4-(*tert*-butyl)-3-(4-methylpent-2-enoyl)oxazolidin-2-one **1e** (23.9 mg, 0.1 mmol, 1.0 eq.), tetrahydrothiophene 1-oxide (40  $\mu$ L, 0.4 mmol, 4.0 eq.) and allyltrichlorosilane (60  $\mu$ L, 0.4 mmol, 0.4 eq.), gave **3e** as a yellow oil (70% yield). Eluent: cyclohexane: ethyl acetate from 9:1 to 3:1.  $[\alpha]_D^{20} = +77.3$  (c 1.00,  $\text{CHCl}_3$ ).

**<sup>1</sup>H-NMR:** δ 4.55 – 4.37 (m, 2H), 4.35 – 4.22 (m, 2H), 3.47 (dd, *J* = 16.4, 10.2 Hz, 1H), 3.29 – 3.17 (m, 1H), 2.05 (ddd, *J* = 13.4, 6.7, 4.2 Hz, 1H), 1.07 (d, *J* = 6.7 Hz, 3H), 1.03 (d, *J* = 6.7 Hz, 3H), 0.95 (s, 9H) ppm.

**<sup>13</sup>C-NMR:** δ 170.1, 154.7, 65.6, 64.1, 61.2, 41.8, 35.8, 34.3, 25.7, 19.7, 17.3 ppm.

**HRMS (ESI<sup>+</sup>):** calculated for C<sub>13</sub>H<sub>23</sub>NO<sub>3</sub>Cl [M+H]<sup>+</sup>: 276.1361; found: 276.1325.

**(S)-3-((S)-3-Bromobutanoyl)-4-(tert-butyl)oxazolidin-2-one (4a)**

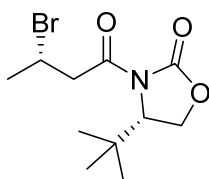

Following general procedure C, (*S,E*)-3-(but-2-enoyl)-4-(*tert*-butyl)oxazolidin-2-one **1b** (21.1 mg, 0.1 mmol, 1.0 eq.), tetrahydrothiophene 1-oxide (40 μL, 0.4 mmol, 4.0 eq.) and tribromo(phenyl)silane (75 μL, 0.4 mmol, 0.4 eq.), gave **4a** as a yellow oil (86% yield). Eluent: cyclohexane: ethyl acetate 4:1. [α]<sub>D</sub><sup>20</sup> = +57.1 (*c* 0.30, CHCl<sub>3</sub>).

**<sup>1</sup>H-NMR:** δ 4.65 – 4.51 (m, 1H), 4.45 (dd, *J* = 7.0, 2.2 Hz, 1H), 4.35 – 4.23 (m, 2H), 3.61 (dd, *J* = 17.1, 8.9 Hz, 1H), 3.39 (dd, *J* = 17.1, 4.6 Hz, 1H), 1.80 (d, *J* = 6.7 Hz, 3H), 0.94 (s, 9H) ppm.

**<sup>13</sup>C-NMR:** δ 169.7, 154.6, 65.6, 61.1, 46.2, 43.4, 35.8, 26.3, 25.7 ppm.

**HRMS (ESI<sup>+</sup>):** calculated for C<sub>11</sub>H<sub>19</sub>NO<sub>3</sub>Br [M+H]<sup>+</sup>: 292.0543; found: 292.0531.

**(S)-3-((R)-3-Bromo-4-methylpentanoyl)-4-(tert-butyl)oxazolidin-2-one (4b)**

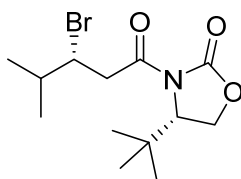

Following general procedure C, (*S,E*)-4-(*tert*-butyl)-3-(4-methylpent-2-enoyl)oxazolidin-2-one **1e** (23.9 mg, 0.1 mmol, 1.0 eq.), tetrahydrothiophene 1-oxide (40 μL, 0.4 mmol, 4.0 eq.) and tribromo(phenyl)silane (75 μL, 0.4 mmol, 0.4 eq.), gave **4b** as a yellow oil (78% yield). Eluent: cyclohexane: ethyl acetate 4:1. [α]<sub>D</sub><sup>20</sup> = +59.2 (*c* 0.45, CHCl<sub>3</sub>).

**<sup>1</sup>H-NMR:** δ 4.56 – 4.43 (m, 2H), 4.34 – 4.23 (m, 2H), 3.68 (dd, *J* = 16.8, 10.3 Hz, 1H), 3.31 (dd, *J* = 16.8, 3.2 Hz, 1H), 2.02 – 1.87 (m, 1H), 1.06 (d, *J* = 6.7 Hz, 3H), 1.02 (d, *J* = 6.7 Hz, 3H), 0.94 (s, 9H) ppm.

**<sup>13</sup>C-NMR:** δ 170.2, 154.7, 65.6, 61.2, 58.2, 42.2, 35.8, 34.5, 25.7, 20.8, 18.2 ppm.

**HRMS (ESI<sup>+</sup>):** calculated for C<sub>13</sub>H<sub>23</sub>NO<sub>3</sub>Br [M+H]<sup>+</sup>: 320.0856; found: 320.0843.

**(S)-3-((R)-3-Bromo-3-phenylpropanoyl)-4-(tert-butyl)oxazolidin-2-one (4c)**

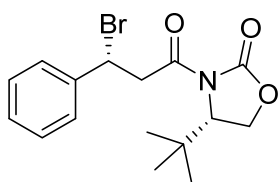

Following general procedure C, (S)-4-(tert-butyl)-3-cinnamoyloxazolidin-2-one **1f** (27.3 mg, 0.1 mmol, 1.0 eq.), tetrahydrothiophene 1-oxide (40  $\mu$ L, 0.4 mmol, 4.0 eq.) and tribromo(phenyl)silane (75  $\mu$ L, 0.4 mmol, 0.4 eq.), gave **4c** as a dark yellow oil (81% yield). Eluent: cyclohexane: ethyl acetate 4:1.  $[\alpha]_D^{20} = +45.8$  (c 0.35,  $\text{CHCl}_3$ ).

$^1\text{H-NMR}$ :  $\delta$  7.52 – 7.46 (m, 2H), 7.38 – 7.27 (m, 3H), 5.53 (dd,  $J = 8.9, 5.8$  Hz, 1H), 4.44 (dd,  $J = 6.6, 2.6$  Hz, 1H), 4.36 – 4.21 (m, 2H), 4.03 (dd,  $J = 17.0, 8.9$  Hz, 1H), 3.86 (dd,  $J = 17.0, 5.8$  Hz, 1H), 0.83 (s, 9H) ppm.

$^{13}\text{C-NMR}$ :  $\delta$  169.4, 154.6, 140.8, 128.8, 128.7, 127.4, 65.6, 61.2, 48.0, 44.8, 35.7, 25.5 ppm.

**HRMS (ESI<sup>+</sup>)**: calculated for  $\text{C}_{16}\text{H}_{21}\text{NO}_3\text{Br}$   $[\text{M}+\text{H}]^+$ : 354.0700; found: 354.0714.

**(S)-3-((R)-3-Bromo-3-(4-nitrophenyl)propanoyl)-4-(tert-butyl)oxazolidin-2-one (4d)**

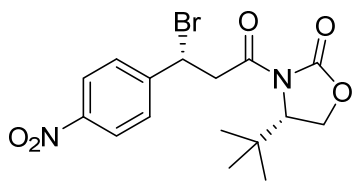

Following general procedure C, (S,E)-4-(tert-butyl)-3-(3-(4-nitrophenyl)acryloyl)oxazolidin-2-one **1g** (31.8 mg, 0.1 mmol, 1.0 eq.), tetrahydrothiophene 1-oxide (40  $\mu$ L, 0.4 mmol, 4.0 eq.) and tribromo(phenyl)silane (75  $\mu$ L, 0.4 mmol, 0.4 eq.), gave **4d** and **4d'** as a yellow oil (85% yield, 90:10 *dr*). Eluent: cyclohexane: ethyl acetate from 9:1 to 4:1.  $[\alpha]_D^{20} = +67.2$  (c 1.25,  $\text{CHCl}_3$ ).

$^1\text{H-NMR}$ :  $\delta$  8.21 (d,  $J = 8.7$  Hz, 2H), 7.66 (d,  $J = 8.7$  Hz, 2H), 5.54 (dd,  $J = 8.2, 6.5$  Hz, 1H), 4.42 (dd,  $J = 6.8, 2.4$  Hz, 1H), 4.36 – 4.26 (m, 2H), 3.98 (dd,  $J = 17.2, 8.2$  Hz, 1H), 3.88 (dd,  $J = 17.2, 6.5$  Hz, 1H), 0.83 (s, 9H) ppm.

$^{13}\text{C-NMR}$ :  $\delta$  168.7, 154.5, 147.8, 147.7, 128.5, 124.0, 65.7, 61.2, 45.1, 44.8, 35.7, 25.5 ppm.

**HRMS (ESI<sup>+</sup>)**: calculated for  $\text{C}_{16}\text{H}_{20}\text{N}_2\text{O}_5\text{Br}$   $[\text{M}+\text{H}]^+$ : 399.0550; found: 399.0563.

**(S)-3-((R)-3-Bromo-3-(2-chlorophenyl)propanoyl)-4-(tert-butyl)oxazolidin-2-one (4e)**

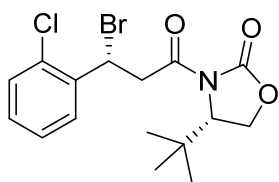

Following general procedure C, (*S,E*)-4-(*tert*-butyl)-3-(3-(2-chlorophenyl)acryloyl)oxazolidin-2-one **1h** (30.8 mg, 0.1 mmol, 1.0 eq.), tetrahydrothiophene 1-oxide (40  $\mu$ L, 0.4 mmol, 4.0 eq.) and tribromo(phenyl)silane (75  $\mu$ L, 0.4 mmol, 0.4 eq.), gave **4e** as a white solid (72% yield). Eluent: cyclohexane: ethyl acetate from 95:5 to 3:1.  $[\alpha]_D^{20} = +39.3$  (c 1.51,  $\text{CHCl}_3$ ).

**$^1\text{H-NMR}$** :  $\delta$  7.64 (dd,  $J = 7.7, 1.8$  Hz, 1H), 7.42 – 7.18 (m, 3H), 5.98 (dd,  $J = 8.8, 5.8$  Hz, 1H), 4.44 (dd,  $J = 6.3, 2.8$  Hz, 1H), 4.34 – 4.24 (m, 2H), 4.13 (dd,  $J = 17.4, 8.8$  Hz, 1H), 3.84 (dd,  $J = 17.4, 5.8$  Hz, 1H), 0.85 (s, 9H) ppm.

**$^{13}\text{C-NMR}$** :  $\delta$  169.0, 154.6, 138.1, 133.0, 130.0, 129.7, 128.7, 127.5, 65.6, 61.2, 43.6, 43.0, 35.7, 25.5 ppm.

**HRMS (ESI<sup>+</sup>)**: calculated for  $\text{C}_{16}\text{H}_{20}\text{NO}_3\text{BrCl}$   $[\text{M}+\text{H}]^+$ : 388.0310; found: 388.0325.

**(S)-3-((R)-3-Bromo-3-(4-chlorophenyl)propanoyl)-4-(tert-butyl)oxazolidin-2-one (4f)**

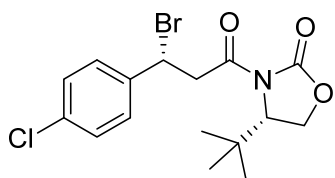

Following general procedure C, (*S,E*)-4-(*tert*-butyl)-3-(3-(4-chlorophenyl)acryloyl)oxazolidin-2-one **1i** (30.8 mg, 0.1 mmol, 1.0 eq.), tetrahydrothiophene 1-oxide (40  $\mu$ L, 0.4 mmol, 4.0 eq.) and tribromo(phenyl)silane (75  $\mu$ L, 0.4 mmol, 0.4 eq.), gave **4f** and **4f'**

as a yellow oil (71% yield, 90:10 *dr*). Eluent: cyclohexane: ethyl acetate 4:1.  $[\alpha]_D^{20} = +49.1$  (c 0.51,  $\text{CHCl}_3$ ).

**$^1\text{H-NMR}$** :  $\delta$  7.42 (d,  $J = 8.5$  Hz, 2H), 7.32 (d,  $J = 8.5$  Hz, 2H), 5.49 (dd,  $J = 8.7, 6.0$  Hz, 1H), 4.43 (dd,  $J = 6.9, 2.2$  Hz, 1H), 4.34 – 4.26 (m, 2H), 3.97 (dd,  $J = 17.0, 8.6$  Hz, 1H), 3.84 (dd,  $J = 16.8, 6.2$  Hz, 1H), 0.84 (s, 9H) ppm.

**$^{13}\text{C-NMR}$** :  $\delta$  169.1, 154.6, 139.4, 134.5, 129.0, 128.8, 65.6, 61.2, 46.7, 44.8, 35.7, 25.5 ppm.

**HRMS (ESI<sup>+</sup>)**: calculated for  $\text{C}_{16}\text{H}_{20}\text{NO}_3\text{BrCl}$   $[\text{M}+\text{H}]^+$ : 388.0310; found: 388.0322.



**(S)-3-((R)-3-Bromo-3-(4-fluorophenyl)propanoyl)-4-(tert-butyl)oxazolidin-2-one (4g)**

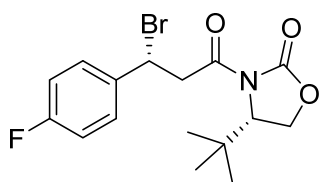

Following general procedure C, (*S,E*)-4-(*tert*-butyl)-3-(3-(4-fluorophenyl)acryloyl)oxazolidin-2-one **1j** (29.1 mg, 0.1 mmol, 1.0 eq.), tetrahydrothiophene 1-oxide (40  $\mu$ L, 0.4 mmol, 4.0 eq.) and tribromo(phenyl)silane (75  $\mu$ L, 0.4 mmol, 0.4 eq.), gave **4g** and **4g'** as a yellow oil (79% yield, 95:5 *dr*). Eluent: cyclohexane: ethyl acetate 4:1.  $[\alpha]_D^{20} = +95.7$  (*c* 0.94,  $\text{CHCl}_3$ ).

**$^1\text{H-NMR}$** :  $\delta$  7.53 – 7.43 (m, 2H), 7.12 – 6.97 (m, 2H), 5.51 (dd, *J* = 8.6, 6.1 Hz, 1H), 4.43 (dd, *J* = 6.7, 2.4 Hz, 1H), 4.34 – 4.25 (m, 2H), 3.98 (dd, *J* = 17.0, 8.6 Hz, 1H), 3.86 (dd, *J* = 17.0, 6.2 Hz, 1H), 0.83 (s, 9H) ppm.

**$^{13}\text{C-NMR}$** :  $\delta$  169.2, 162.6 (d, *J* = 248.4 Hz), 154.6, 136.8 (d, *J* = 3.4 Hz), 129.3 (d, *J* = 8.4 Hz), 115.7 (d, *J* = 21.8 Hz), 65.6, 61.1, 46.9, 45.0, 35.7, 25.5 ppm.

**$^{19}\text{F-NMR}$** :  $\delta$  -112.6 ppm.

**HRMS (ESI<sup>+</sup>)**: calculated for  $\text{C}_{16}\text{H}_{20}\text{NO}_3\text{BrF}$  [ $\text{M}+\text{H}$ ]<sup>+</sup>: 372.0605; found: 372.0618.

**(S)-3-((R)-3-Bromo-3-(3-methoxyphenyl)propanoyl)-4-(tert-butyl)oxazolidin-2-one (4h)**

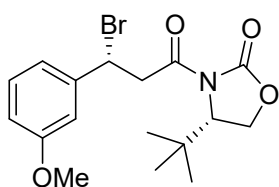

Following general procedure C, (*S,E*)-4-(*tert*-butyl)-3-(3-(3-methoxyphenyl)acryloyl)oxazolidin-2-one **1k** (30.3 mg, 0.1 mmol, 1.0 eq.), tetrahydrothiophene 1-oxide (40  $\mu$ L, 0.4 mmol, 4.0 eq.) and tribromo(phenyl)silane (75  $\mu$ L, 0.4 mmol, 0.4 eq.), gave **4h** as a yellow oil (61% yield). Eluent: cyclohexane: ethyl acetate from 98:2 to 3:1.  $[\alpha]_D^{20} = +99.9$  (*c* 1.01,  $\text{CHCl}_3$ ).

**$^1\text{H-NMR}$** :  $\delta$  7.29 – 7.21 (m, 1H), 7.10 – 7.01 (m, 2H), 6.86 – 6.80 (m, 1H), 5.49 (dd, *J* = 8.8, 5.8 Hz, 1H), 4.44 (dd, *J* = 6.6, 2.5 Hz, 1H), 4.33 – 4.23 (m, 2H), 3.99 (dd, *J* = 16.9, 8.8 Hz, 1H), 3.92 – 3.84 (m, 1H), 3.82 (s, 3H), 0.84 (s, 9H) ppm.

**$^{13}\text{C-NMR}$** :  $\delta$  169.3, 159.8, 154.6, 142.2, 129.8, 119.6, 114.5, 112.9, 65.5, 61.2, 55.3, 47.9, 44.7, 35.7, 25.5 ppm.

**HRMS (ESI<sup>+</sup>)**: calculated for  $\text{C}_{17}\text{H}_{23}\text{NO}_4\text{Br}$  [ $\text{M}+\text{H}$ ]<sup>+</sup>: 384.0805; found: 384.0798.

**(S)-3-((2S,3S)-3-Bromo-2-methylpentanoyl)-4-(tert-butyl)oxazolidin-2-one (4i)**

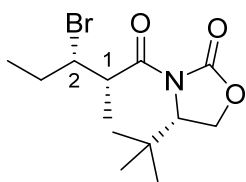

Following general procedure C, (*S,E*)-4-(*tert*-butyl)-3-(2-methylpent-2-enoyl)oxazolidin-2-one **1m** (23.9 mg, 0.1 mmol, 1.0 eq.), tetrahydrothiophene 1-oxide (40  $\mu$ L, 0.4 mmol, 4.0 eq.) and tribromo(phenyl)silane (75  $\mu$ L, 0.4 mmol, 0.4 eq.), gave **4i** as a yellow oil

(55% yield). Eluent: cyclohexane: ethyl acetate 4:1.  $[\alpha]_D^{20} = +23.4$  (*c* 0.14,  $\text{CHCl}_3$ ).

$^1\text{H-NMR}$ :  $\delta$  4.55 – 4.45 (m, 2H), 4.37 – 4.23 (m, 2H), 3.95 (qd,  $J = 6.7, 3.7$  Hz, 1H), 2.05 – 1.87 (m, 2H), 1.24 (d,  $J = 6.7$  Hz, 3H), 1.10 (t,  $J = 7.3$  Hz, 3H), 0.97 (s, 9H) ppm.

$^{13}\text{C-NMR}$ :  $\delta$  173.3, 154.6, 65.4, 61.1, 60.2, 43.7, 35.8, 26.9, 25.7, 12.5, 12.1 ppm.

**HRMS (ESI<sup>+</sup>)**: calculated for  $\text{C}_{13}\text{H}_{22}\text{NO}_3\text{BrNa}$   $[\text{M}+\text{Na}]^+$ : 342.0675; found: 342.0667.

The relative stereochemistry between the bromide and the methyl substituents was determined as *syn*. The coupling constant of 3.7 Hz between  $\text{H}_1$  and  $\text{H}_2$  can only be assumed if both hydrogens are in a *syn* disposition.<sup>5</sup>

<sup>5</sup> Following Karplus equation:  $^3J_{\text{gauche}} = 2\text{--}5$  Hz and  $^3J_{\text{anti}} = 8\text{--}15$  Hz

## 5. General procedure D for the nucleophilic bromination to diverse Michael acceptors.

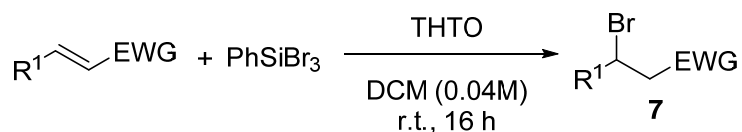

The corresponding Michael acceptor (0.1 mmol, 1.0 eq.) was dissolved in dichloromethane (2.5 mL) in a vial. Then, tetrahydrothiophene 1-oxide (40  $\mu\text{L}$ , 0.4 mmol, 4.0 eq.) and the tribromo(phenyl)silane (75  $\mu\text{L}$ , 0.4 mmol, 4 eq.) were added and the reaction was stirred for 16 hours. Finally, the crude mixture was purified by flash column chromatography using Iatrobeds silica gel and eluting with the solvent indicated in each case.

### 3-Bromobutanenitrile (**7a**)<sup>6</sup>

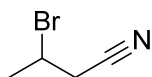

Following general procedure D, (*E*)-but-2-enenitrile (8  $\mu\text{L}$ , 0.1 mmol, 1 eq.) gave **7a** as a yellow oil (92% yield). Eluent: cyclohexane: ethyl acetate 9:1. The NMR is

in accordance with the literature.

<sup>1</sup>H-NMR:  $\delta$  4.29 – 4.17 (m, 1H), 2.95 (d,  $J$  = 6.7, Hz, 2H), 1.84 (dd,  $J$  = 6.7, 1.0 Hz, 3H) ppm.

<sup>13</sup>C-NMR:  $\delta$  116.5, 40.0, 29.7, 25.4 ppm.

### 3-Bromo-3-phenylpropanenitrile (**7b**)

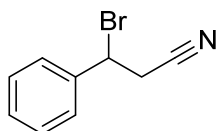

Following general procedure D, cinnamonitrile (13  $\mu\text{L}$ , 0.1 mmol, 1 eq.) gave **7b** as a yellow oil (70% yield). Eluent: cyclohexane: ethyl acetate 9:1.

<sup>1</sup>H-NMR:  $\delta$  7.65 – 7.29 (m, 5H), 5.14 (t,  $J$  = 7.1 Hz, 1H), 3.29 (dd,  $J$  = 17.0, 7.1 Hz, 1H), 3.22 (dd,  $J$  = 17.0, 7.1 Hz, 1H) ppm.

<sup>13</sup>C-NMR:  $\delta$  138.7, 129.5, 129.1, 127.0, 116.4, 45.3, 29.4 ppm.

The desired mass for HRMS was not detected.

<sup>6</sup> National Institute of Advanced Industrial Science and Technology (AIST).

### 3-Bromobutanoic acid (**7c**)<sup>7</sup>

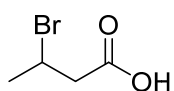

Following general procedure D, methyl crotonate (11  $\mu$ L, 0.1 mmol, 1.0 eq.) gave **7c** as a yellow oil (55% yield). Eluent: cyclohexane: ethyl acetate 4:1. The

<sup>1</sup>H-NMR is in accordance with the literature.

<sup>1</sup>H-NMR:  $\delta$  4.53 – 4.37 (m, 1H), 3.08 – 2.83 (m, 2H), 1.78 (d,  $J$  = 6.7 Hz, 3H) ppm.

### 3-Bromo-1,5-diphenylpentan-1-one (**7d**)

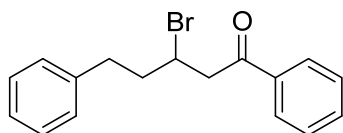

Following general procedure D, (*E*)-1,5-diphenylpent-2-en-1-one (23.6 mg, 0.1 mmol, 1 eq.) gave **7d** as a yellow oil (80% yield).

Eluent: cyclohexane: ethyl acetate 4:1.

<sup>1</sup>H-NMR:  $\delta$  7.96 – 7.91 (m, 2H), 7.68 – 7.53 (m, 1H), 7.52 – 7.41 (m, 2H), 7.37 – 7.15 (m, 5H), 4.59 – 4.65 – 4.53 (m, 1H), 3.75 (dd,  $J$  = 17.4, 7.3 Hz, 1H), 3.43 (dd,  $J$  = 17.4, 6.1 Hz, 1H), 3.05 – 2.91 (m, 1H), 2.88 – 2.76 (m, 1H), 2.35 – 2.09 (m, 2H) ppm.

<sup>13</sup>C-NMR:  $\delta$  196.5, 140.6, 136.5, 133.5, 128.7, 128.7, 128.5, 128.1, 126.2, 49.3, 47.7, 40.5, 33.8 ppm.

HRMS (ESI<sup>+</sup>): calculated for C<sub>17</sub>H<sub>17</sub>BrONa [M+Na]<sup>+</sup>: 339.0354; found: 339.0341.

### 4-Bromotetrahydro-2H-pyran-2-one (**7e**)

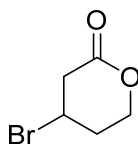

Following general procedure D, 5,6-dihydro-2H-pyran-2-one (9  $\mu$ L, 0.1 mmol, 1 eq.) gave **7e** as a yellow oil (65% yield). Eluent: cyclohexane: ethyl acetate 7:3.

<sup>1</sup>H-NMR:  $\delta$  4.67 (ddd,  $J$  = 11.9, 7.8, 4.3 Hz, 1H), 4.52 – 4.43 (m, 1H), 4.43 – 4.34 (m, 1H), 3.23 (dd,  $J$  = 18.2, 5.6, 1H), 3.03 (ddd,  $J$  = 18.2, 6.3, 1.1 Hz, 1H), 2.45 – 2.30 (m, 1H), 2.31 – 2.17 (m, 1H) ppm.

<sup>13</sup>C-NMR:  $\delta$  167.20, 66.7, 41.0, 40.8, 32.3 ppm.

The desired mass for HRMS was not detected.

<sup>7</sup> G.-A. Olah, R. Karpeles and S.-C. Narang, *Synthesis*, 1982, **11**, 963.

#### 4-Bromodihydrofuran-2(3H)-one (**7f**)<sup>8</sup>

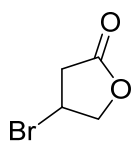

Following general procedure D, furan-2(5H)-one (8  $\mu$ L, 0.1 mmol, 1 eq.) gave **7f** as a yellow oil (60% yield). Eluent: cyclohexane: ethyl acetate 4:1. The NMR is in accordance with the literature.

<sup>1</sup>H-NMR:  $\delta$  4.73 – 4.60 (m, 1H), 4.59 – 4.51 (m, 1H), 3.23 – 3.06 (m, 1H), 2.98 – 2.88 (m, 1H), 2.89 – 2.85 (m, 1H) ppm.

<sup>13</sup>C-NMR:  $\delta$  173.5, 75.5, 39.8, 39.3 ppm.

#### 3-Bromo-1-(piperidin-1-yl)butan-1-one (**7g**)

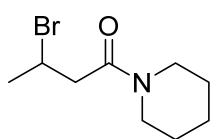

Following general procedure D, (*E*)-1-(piperidin-1-yl)but-2-en-1-one (15 mg, 0.1 mmol, 1 eq.) gave **7g** as a yellow oil (40% yield). Eluent: cyclohexane: ethyl acetate 4:1.

<sup>1</sup>H-NMR:  $\delta$  4.61 (h, *J* = 6.7 Hz, 1H), 3.69 – 3.56 (m, 1H), 3.56 – 3.46 (m, 1H), 3.49 – 3.33 (m, 2H), 3.06 (dd, *J* = 15.6, 7.0 Hz, 1H), 2.75 (dd, *J* = 15.6, 6.7 Hz, 1H), 1.78 (d, *J* = 6.7 Hz, 3H), 1.71 – 1.50 (m, 6H) ppm.

<sup>13</sup>C-NMR:  $\delta$  167.8, 46.8, 45.5, 44.1, 42.9, 26.6, 26.5, 25.5, 24.5 ppm.

HRMS (ESI<sup>+</sup>): calculated for C<sub>9</sub>H<sub>16</sub>NOBrNa [M+Na]<sup>+</sup>: 256.0307; found: 256.0309.

#### 4-Bromo-1-ethylpiperidin-2-one (**7h**)

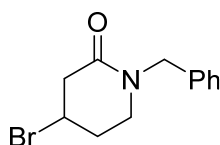

Following general procedure D, 1-benzyl-5,6-dihydropyridin-2(1H)-one (19 mg, 0.1 mmol, 1 eq.) gave **7h** as a yellow oil (70% yield). Eluent: cyclohexane: ethyl acetate 4:1.

<sup>1</sup>H-NMR:  $\delta$  7.38 – 7.22 (m, 1H), 4.68 (d, *J* = 14.7 Hz, 1H), 4.58 (d, *J* = 14.7 Hz, 1H), 4.48 – 4.40 (m, 1H), 3.48 (ddd, *J* = 12.6, 7.4, 5.1 Hz, 1H), 3.27 – 3.08 (m, 2H), 3.00 – 2.92 (m, 1H), 2.39 – 2.09 (m, 1H) ppm.

<sup>13</sup>C-NMR:  $\delta$  166.4, 136.5, 128.7, 128.1, 127.6, 50.1, 44.4, 43.5, 42.4, 32.2 ppm.

HRMS (ESI<sup>+</sup>): calculated for C<sub>12</sub>H<sub>14</sub>NOBrNa [M+Na]<sup>+</sup>: 290.0151; found: 290.0145.

<sup>8</sup> N.-J. Van Zee and V. Dragojlovic, *Org. Lett.*, 2009, **11**, 3190.

### 3,4-Dibromo-4-phenylbutan-2-one (**8a**)<sup>9</sup>

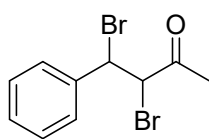

Following general procedure D, (*E*)-4-phenylbut-3-en-2-one (14.6 mg, 0.1 mmol, 1 eq.) gave **8a** as a brown solid (75% yield). Eluent: cyclohexane: ethyl acetate 90:10. The <sup>1</sup>H-NMR is in accordance with the literature.

<sup>1</sup>H-NMR: δ 7.51 – 7.34 (m, 5H), 5.32 (d, *J* = 11.7 Hz, 1H), 4.93 (d, *J* = 11.7 Hz, 1H), 2.48 (s, 3H) ppm.

<sup>13</sup>C-NMR: δ 198.3, 137.8, 129.3, 128.9, 128.1, 52.8, 49.5, 26.9 ppm.

### 1,2-Dibromo-1-nitrohexane (**8b**)

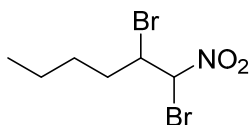

Following general procedure D, (*E*)-1-nitrohex-1-ene (13.0 mg, 0.1 mmol, 1 eq.) gave **8b** as a yellow oil (55% yield). Eluent: cyclohexane: ethyl acetate 95:5.

<sup>1</sup>H-NMR: δ 5.97 (d, *J* = 10.1 Hz, 1H), 4.52 (ddd, *J* = 10.1, 9.3, 2.8 Hz, 1H), 2.24 – 2.08 (m, 1H), 1.93 – 1.79 (m, 1H), 1.65 – 1.29 (m, 4H), 0.96 (t, *J* = 7.2 Hz, 3H) ppm.

<sup>13</sup>C-NMR: δ 80.6, 50.9, 33.6, 28.3, 21.8, 13.7 ppm.

The desired mass for HRMS was not detected.

### 2,3-Dibromotetrahydrothiophene (**SI2**)

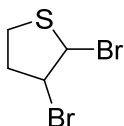

Following general procedure D, **SI2** was obtained as an impurity in all the cases.

<sup>1</sup>H-NMR: δ 5.86 – 5.79 (m, 1H), 5.03 (d, *J* = 3.9 Hz, 1H), 3.51 – 3.40 (m, 1H), 3.39 – 3.29 (m, 1H), 2.96 – 2.80 (m, 1H), 2.58 – 2.46 (m, 1H) ppm.

<sup>13</sup>C-NMR: δ 65.1, 58.8, 36.1, 31.8 ppm.

The desired mass for HRMS was not detected.

### 1-Bromotetrahydro-1H-thiophen-1-ium bromide (**SI3**)<sup>10</sup>

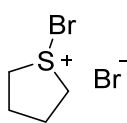

THTO (30 μL, 0.3 mmol, 1.0 eq.) and 2.5 mL of HFB were added in a vial. Then, the tribromo(phenyl)silane (56 μL, 0.3 mmol, 1.0 eq.) was added and the reaction mixture was stirred for 5 min. The mixture was filtrated through a Buchner funnel

<sup>9</sup> K.-M. Kim and I.-H. Park, *Synthesis*, 2004, **16**, 2641.

<sup>10</sup> G. E. Wilson Jr. and R. Albert, *J. Org. Chem.*, 1973, **38**, 2156.

and a yellow solid **S13** was isolated and immediately stored under nitrogen atmosphere. The  $^1\text{H}$ -NMR is in accordance with the literature.

$^1\text{H}$ -NMR:  $\delta$  3.37 (bs, 4H), 2.30 (bs, 4H) ppm.

## 6. General procedures for the removal of the chiral auxiliary.

### 6.1. General procedure E: removal of the chiral auxiliary to the alcohol.

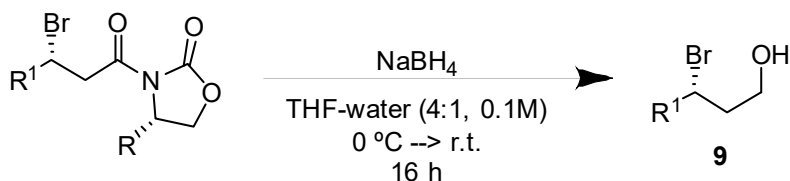

The corresponding  $\beta$ -halogenated oxazolidinone (0.1 mmol, 1.0 eq.) was dissolved in THF (0.8 mL) and water (0.2 mL) in a vial. Then, the mixture was cooled to 0 °C and NaBH<sub>4</sub> (15.1 mg, 0.4 mmol, 4.0 eq.) was added. The reaction was stirred for 16 h at room temperature. After that, the THF was evaporated under reduced pressure and the residue was diluted with water and extracted with AcOEt (3 x 3 mL). The organic phases were combined and dried over MgSO<sub>4</sub>, filtered and evaporated. Finally, the crude mixture was purified by flash column chromatography using Iatrobeds silica gel and eluting with the solvent indicated in each case.

#### (*R*)-3-Bromo-3-phenylpropan-1-ol (**9a**)

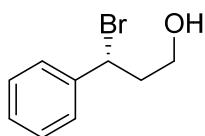

Following general procedure E, (*S*)-3-((*R*)-3-bromo-3-phenylpropanoyl)-4-(tert-butyl)oxazolidin-2-one **4c** (35.4 mg, 0.1 mmol, 1.0 eq.) gave **9a** as a yellow oil (58% yield). Eluent: cyclohexane: ethyl acetate 3:1.  $[\alpha]^{20}_{\text{D}} = -2.7$  (c 1.1, CHCl<sub>3</sub>).

<sup>1</sup>H-NMR: 7.46 – 7.28 (m, 5H), 5.23 (dd, *J* = 9.2, 5.8 Hz, 1H), 3.91 – 3.81 (m, 1H), 3.80 – 3.70 (m, 1H), 2.59 – 2.43 (m, 1H), 2.40 – 2.27 (m, 1H) ppm.

<sup>13</sup>C-NMR:  $\delta$  141.8, 128.8, 128.4, 127.3, 60.7, 52.0, 42.2 ppm.

The desired mass for HRMS was not detected.

#### (*R*)-3-Bromo-3-(4-chlorophenyl)propan-1-ol (**9b**)

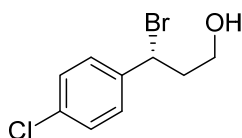

Following general procedure E, (*S*)-3-((*R*)-3-bromo-3-(4-chlorophenyl)propanoyl)-4-(tert-butyl)oxazolidin-2-one **4f** (38.8 mg, 0.1 mmol, 1.0 eq.) gave **9b** as a yellow oil (60% yield). Eluent: cyclohexane: ethyl acetate 3:1.  $[\alpha]^{20}_{\text{D}} = -2.9$  (c 0.99, CHCl<sub>3</sub>).

<sup>1</sup>H-NMR:  $\delta$  7.36 (d, *J* = 8.9 Hz, 2H), 7.31 (d, *J* = 8.9 Hz, 2H), 5.19 (dd, *J* = 9.2, 5.7 Hz, 1H), 3.90 – 3.80 (m, 1H), 3.78 – 3.69 (m, 1H), 2.53 – 2.40 (m, 1H), 2.36 – 2.25 (m, 1H) ppm.

<sup>13</sup>C-NMR:  $\delta$  140.4, 134.2, 128.9, 128.7, 60.4, 50.7, 42.1 ppm.



The desired mass for HRMS was not detected.

## 6.2. General procedure F: removal of the chiral auxiliary to the carboxylic acid.

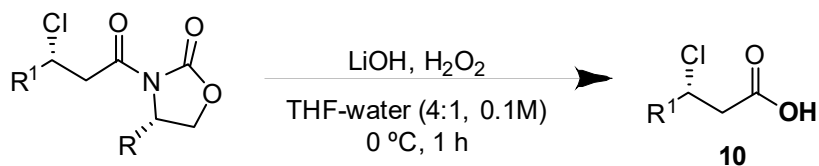

The corresponding  $\beta$ -halogenated oxazolidinone (0.1 mmol, 1.0 eq.) was dissolved in THF (0.8 mL) and water (0.2 mL) in a vial. Then, the mixture was cooled to 0 °C and H<sub>2</sub>O<sub>2</sub> (aq. solution 30%, 40  $\mu$ L, 0.4 mmol, 4.0 eq.) was added and the mixture was stirred for 5 minutes. LiOH (6.3 mg, 0.15 mmol, 1.5 eq.) was then added and the reaction was stirred for 1h at 0 °C. After that, the THF was evaporated under reduced pressure and the residue was diluted with water and extracted with Et<sub>2</sub>O (3 x 3 mL). The organic phases were combined and dried over MgSO<sub>4</sub>, filtered and evaporated. Finally, the crude mixture was purified by flash column chromatography using Iatrobeds silica gel and eluting with the solvent indicated in each case.

### (S)-3-Chlorobutanoic acid (**10a**)<sup>11</sup>

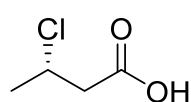

Following general procedure F, (S)-4-(tert-butyl)-3-((S)-3-chlorobutanoyl)oxazolidin-2-one **3b** (24.7 mg, 0.1 mmol, 1.0 eq.) gave **10a** as a yellow oil (45% yield) after distillation under reduced pressure (102 °C, 14 mmHg). [ $\alpha$ ]<sub>D</sub><sup>20</sup> = -2.0 (c 1.48, CHCl<sub>3</sub>). The NMR is in accordance with the literature.

**<sup>1</sup>H-NMR:**  $\delta$  4.50 – 4.35 (m, 1H), 2.86 (dd,  $J$  = 16.3, 7.9 Hz, 1H), 2.76 (dd,  $J$  = 16.3, 6.0 Hz, 1H), 1.60 (d,  $J$  = 6.6 Hz, 3H) ppm.

**<sup>13</sup>C-NMR:**  $\delta$  175.3, 52.2, 44.7, 24.9 ppm.

### (S)-3-Chlorooctanoic acid (**10b**)

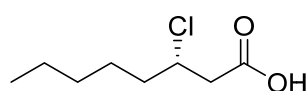

Following general procedure F, (S)-4-(tert-butyl)-3-((S)-3-chlorooctanoyl)oxazolidin-2-one **3d** (31 mg, 0.1 mmol, 1.0 eq.) gave **10b** as a yellow oil (55% yield) after distillation under reduced pressure (154 °C, 22 mmHg). [ $\alpha$ ]<sub>D</sub><sup>20</sup> = +1.1 (c 0.50, CHCl<sub>3</sub>).

**<sup>1</sup>H-NMR:**  $\delta$  4.35 – 4.22 (m, 1H), 2.81 (d,  $J$  = 6.9 Hz, 2H), 1.66 – 1.40 (m, 3H), 1.40 – 1.22 (m, 5H), 0.90 (t,  $J$  = 6.6 Hz, 3H) ppm.

<sup>11</sup> Y. Tanaka, H. Sakuraba and H. Nakanishi, *J. Org. Chem.*, 1990, **55**, 564.

**<sup>13</sup>C-NMR:** δ 152.8, 57.4, 37.9, 31.1, 25.9, 22.5, 22.5, 13.9 ppm.

**HRMS (ESI<sup>+</sup>):** calculated for C<sub>8</sub>H<sub>16</sub>ClO<sub>2</sub> [M+H]<sup>+</sup>: 179.0834; found: 179.0847.

## 7. NMR spectra.

### (*S,E*)-4-(*tert*-Butyl)-3-(pent-2-enoyl)oxazolidin-2-one (1c)

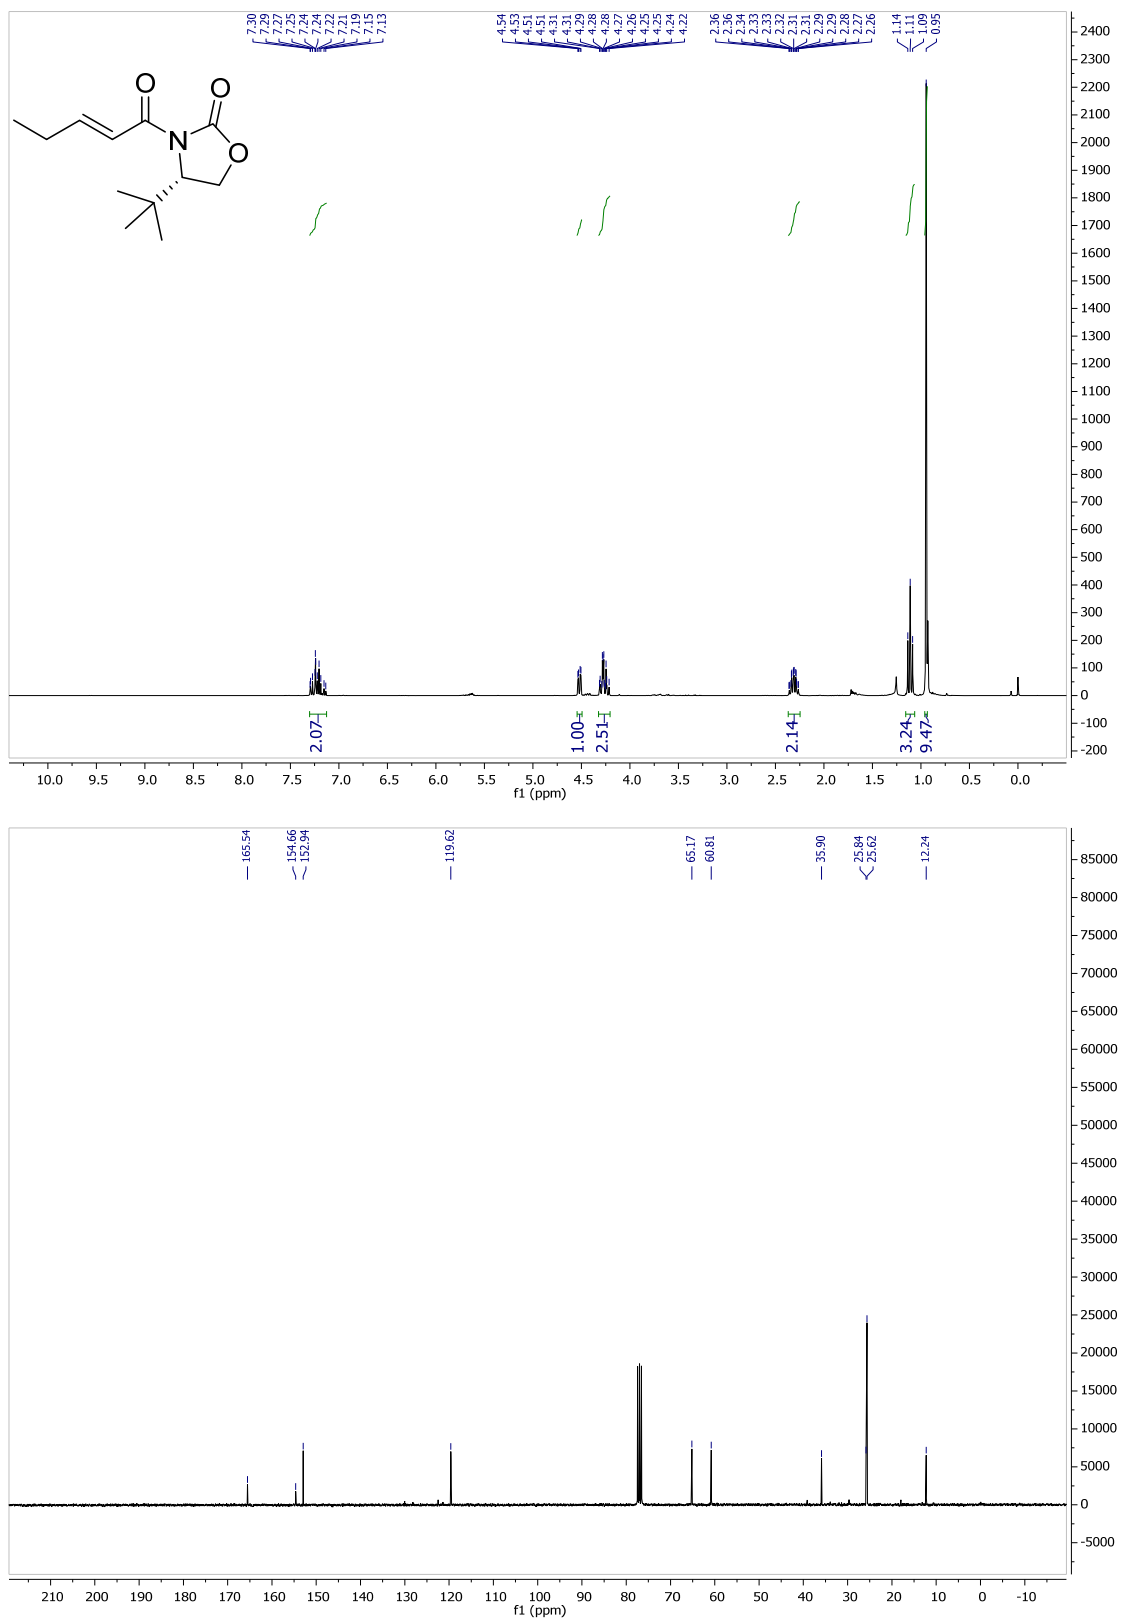

**(S,E)-4-(tert-Butyl)-3-(oct-2-enyl)oxazolidin-2-one (1d)**

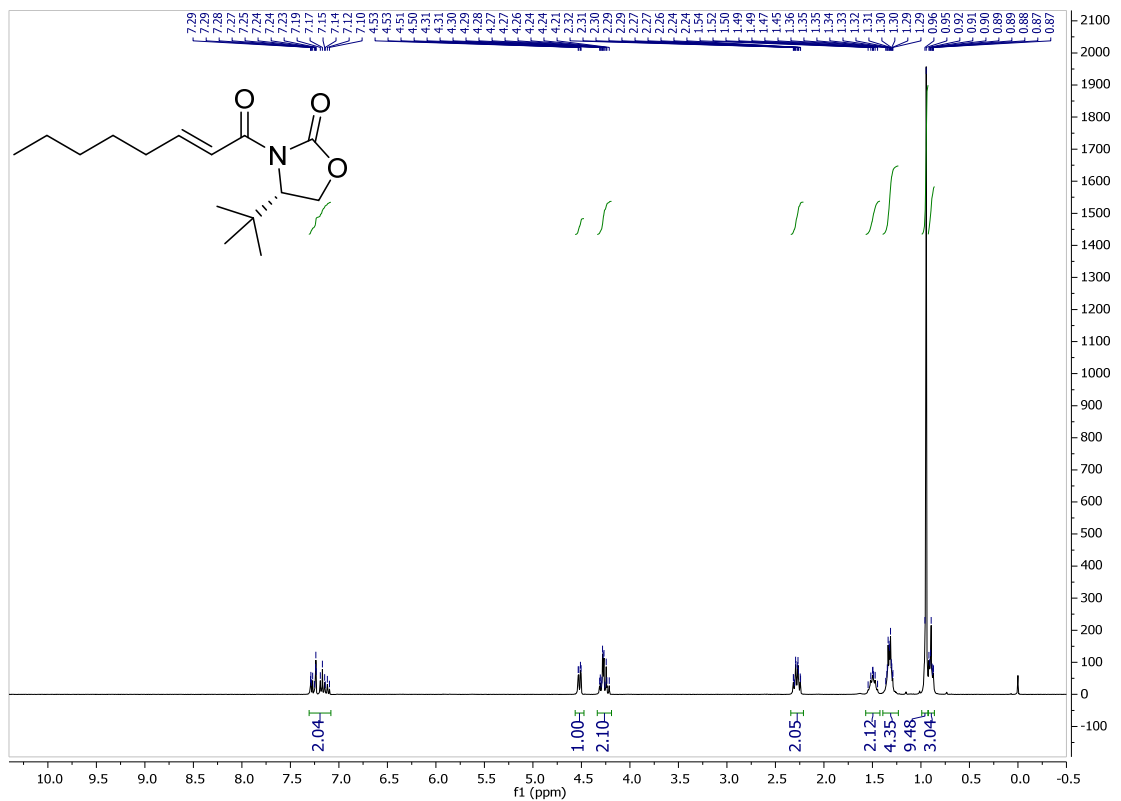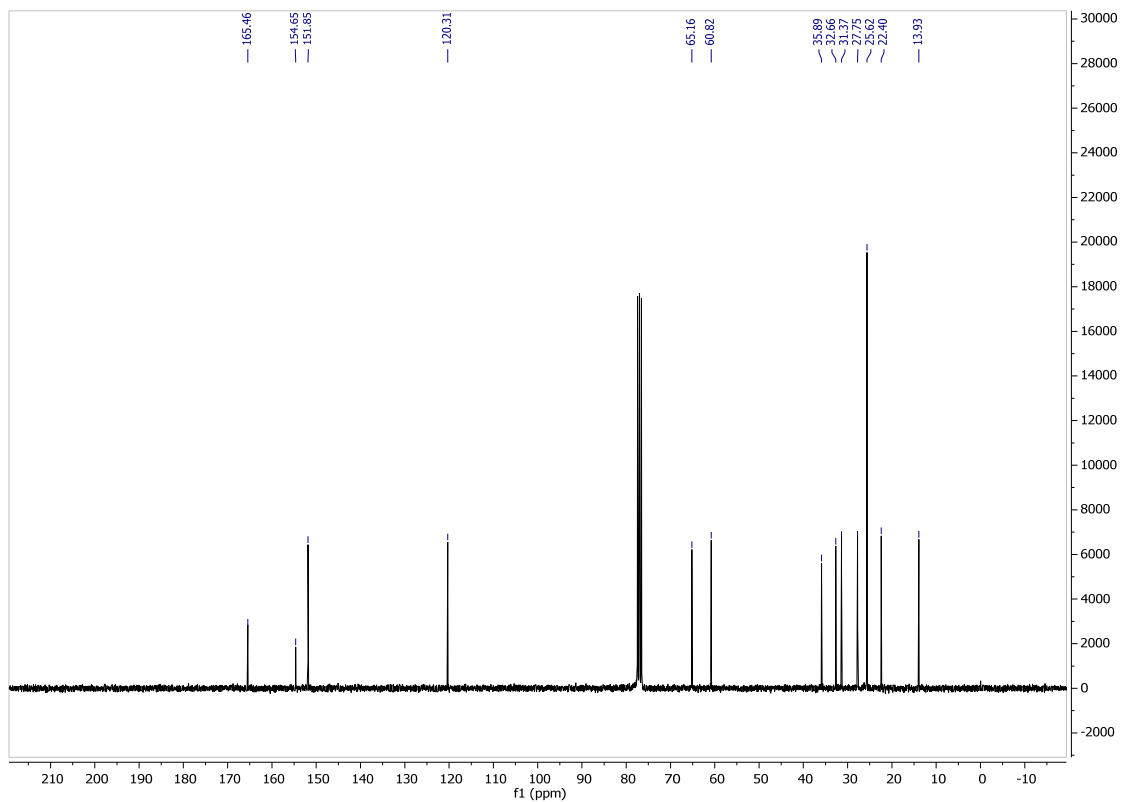

**(S)-4-(tert-Butyl)-3-cinnamoyloxazolidin-2-one (1f)**

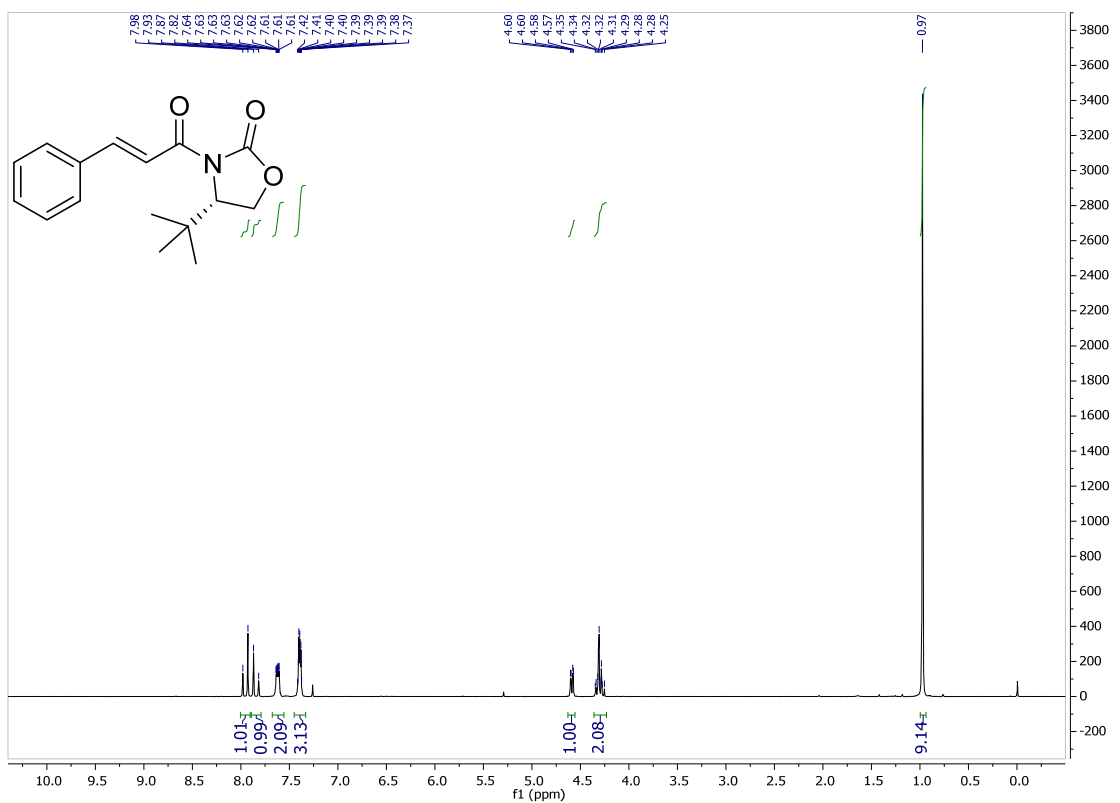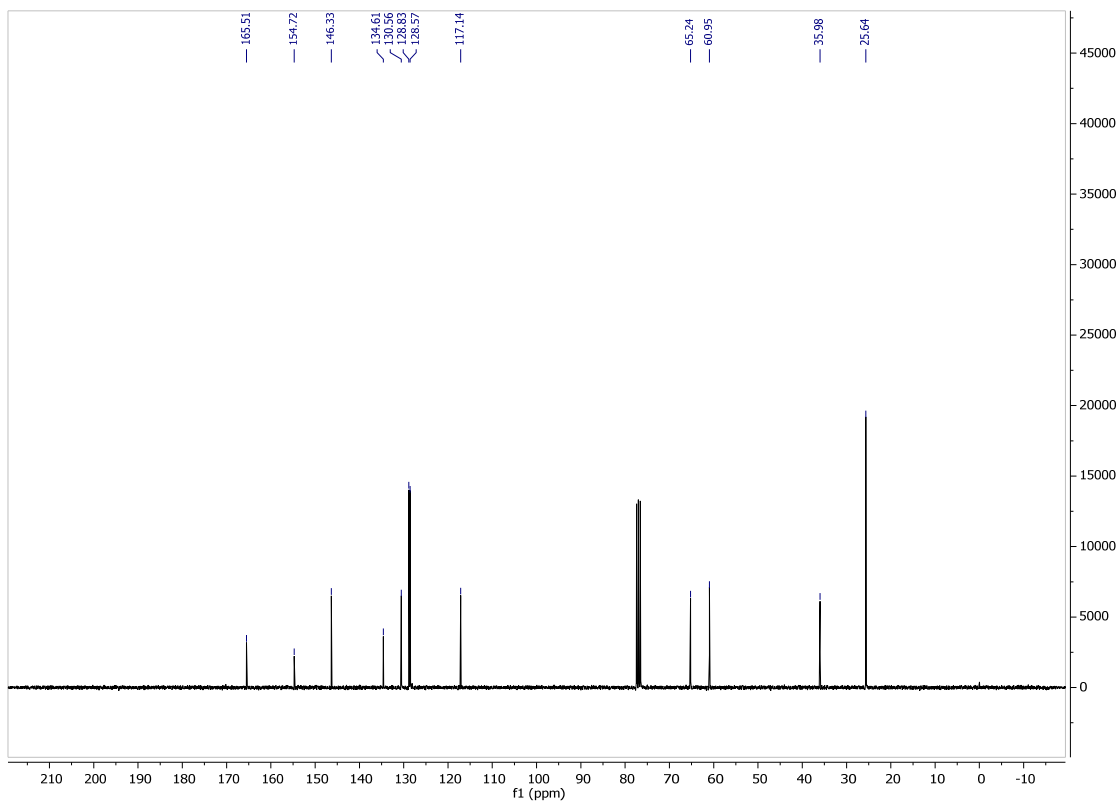

**(S,E)-4-(tert-Butyl)-3-(3-(4-nitrophenyl)acryloyl)oxazolidin-2-one (1g)**

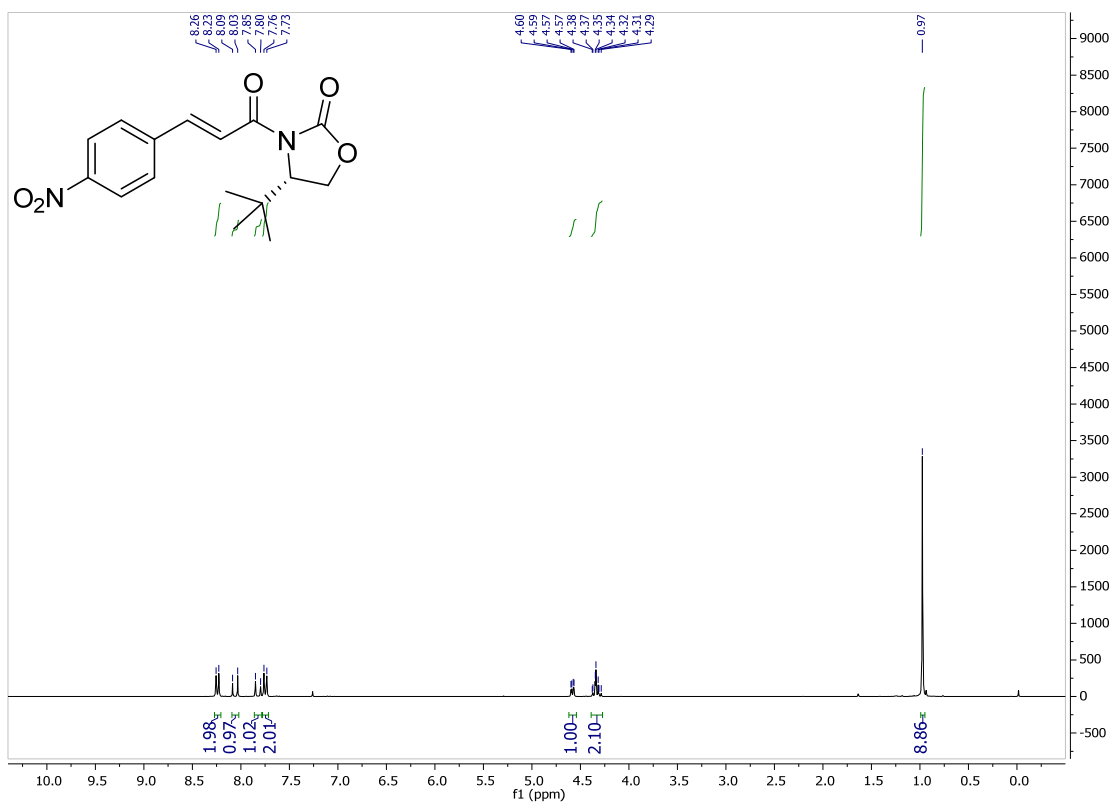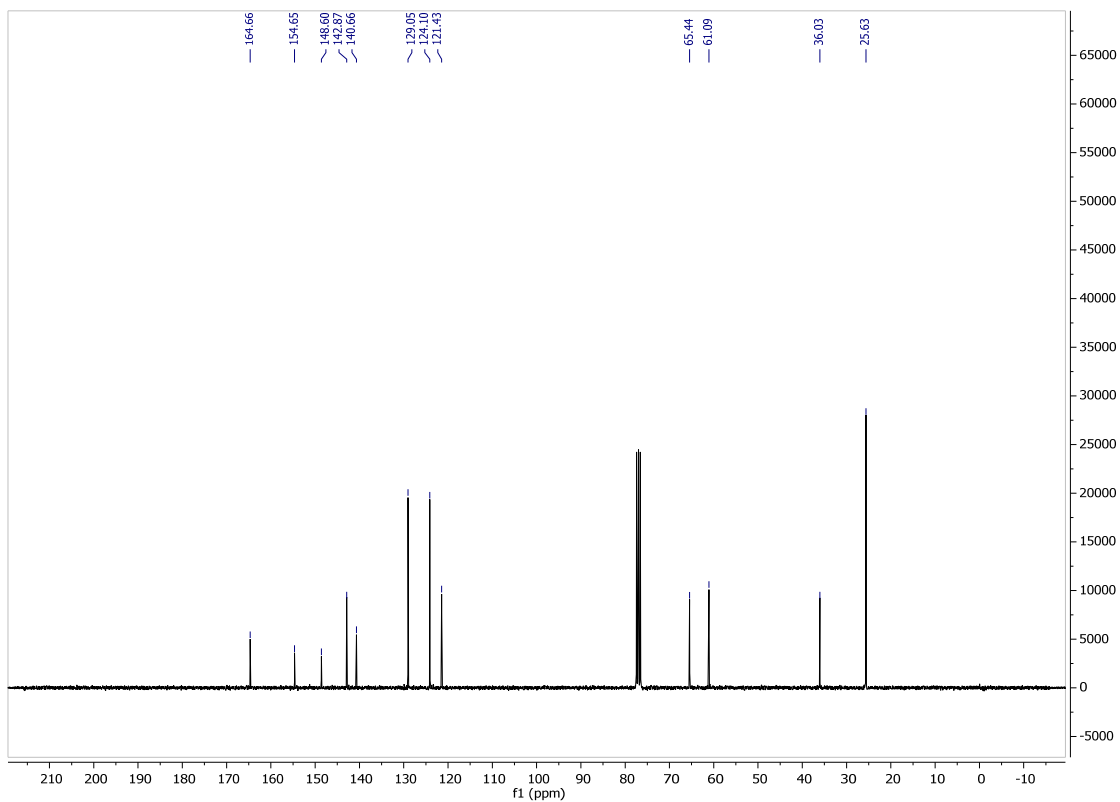

**(S,E)-4-(tert-Butyl)-3-(3-(2-chlorophenyl)acryloyl)oxazolidin-2-one (1h)**

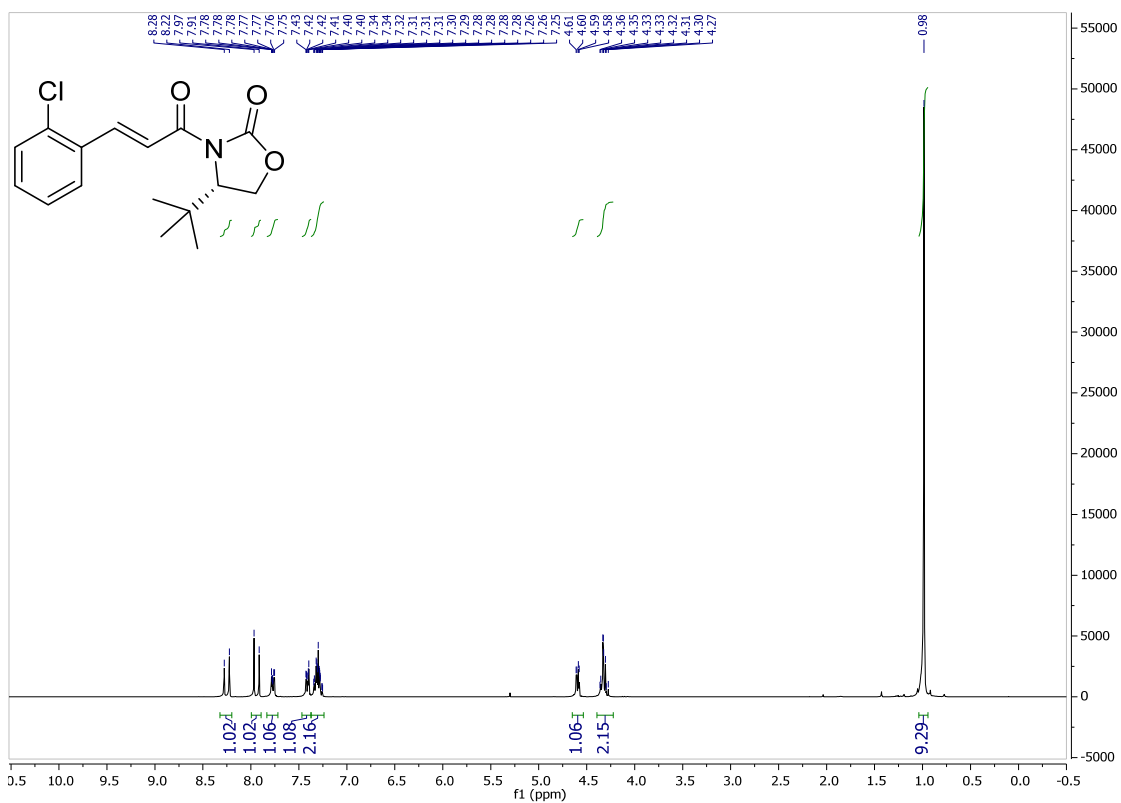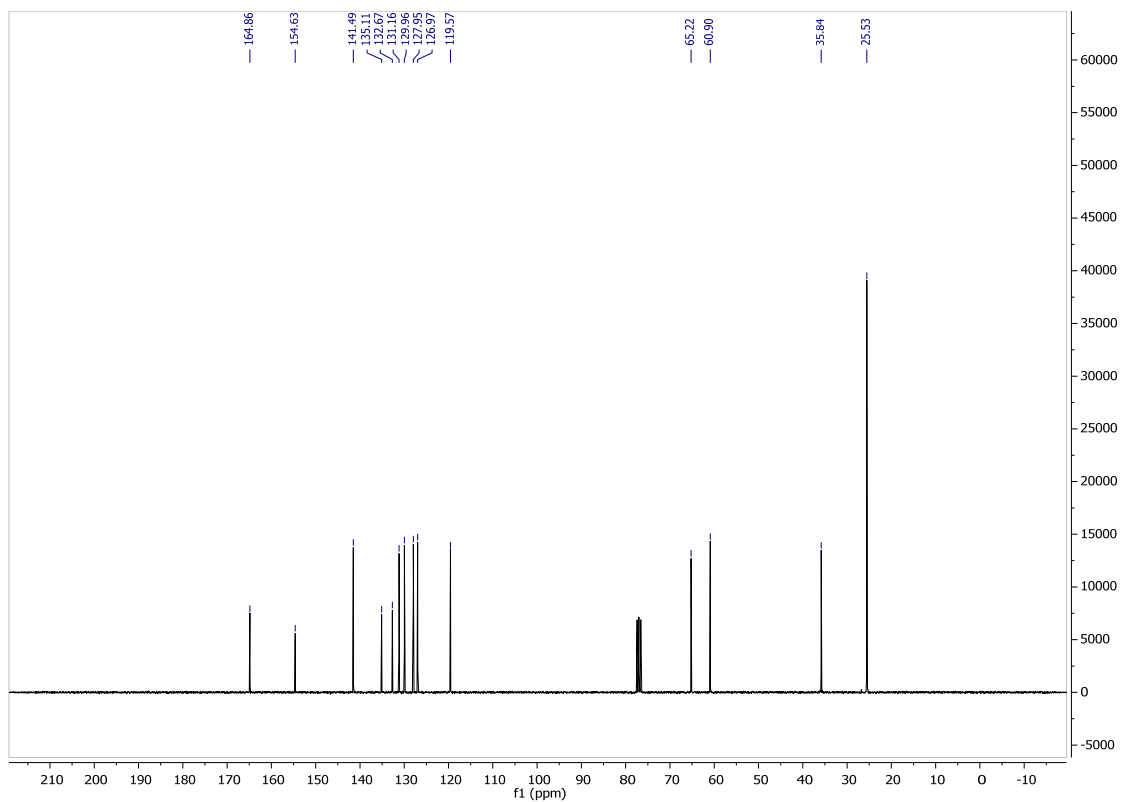

**(S,E)-4-(tert-Butyl)-3-(3-(4-chlorophenyl)acryloyl)oxazolidin-2-one (1i)**

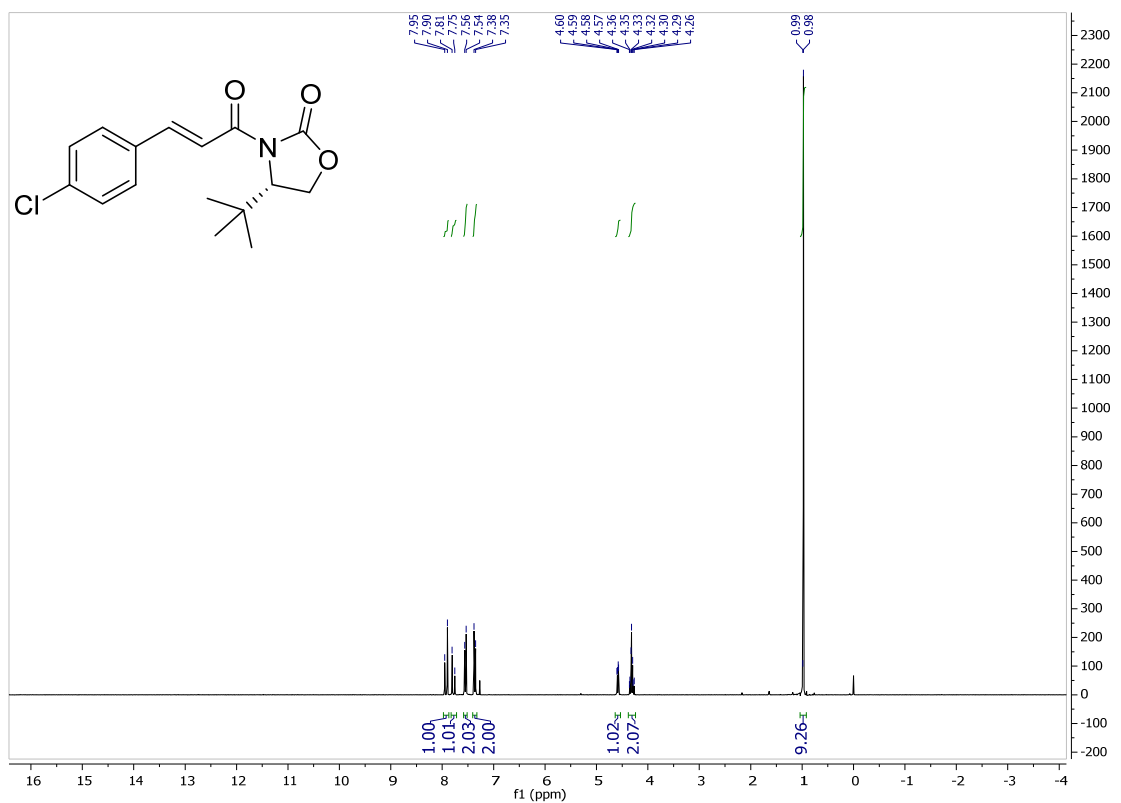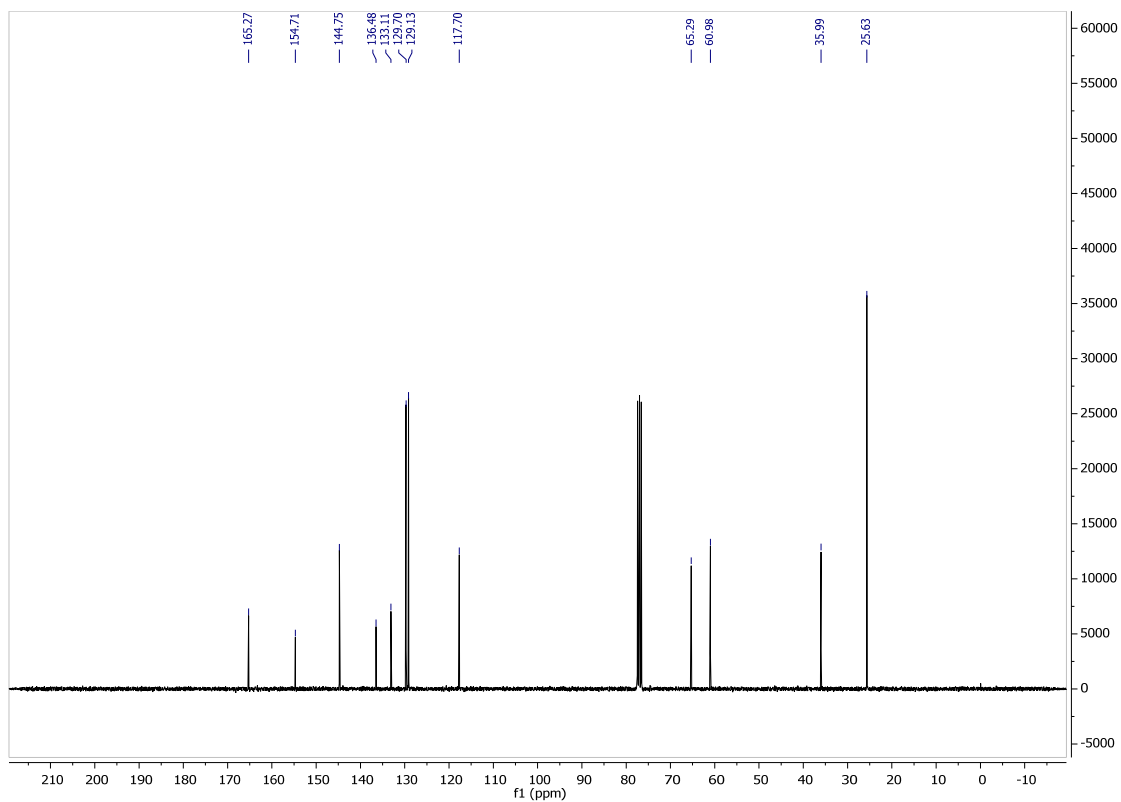



**(S,E)-4-(tert-Butyl)-3-(3-(4-fluorophenyl)acryloyl)oxazolidin-2-one (1j)**

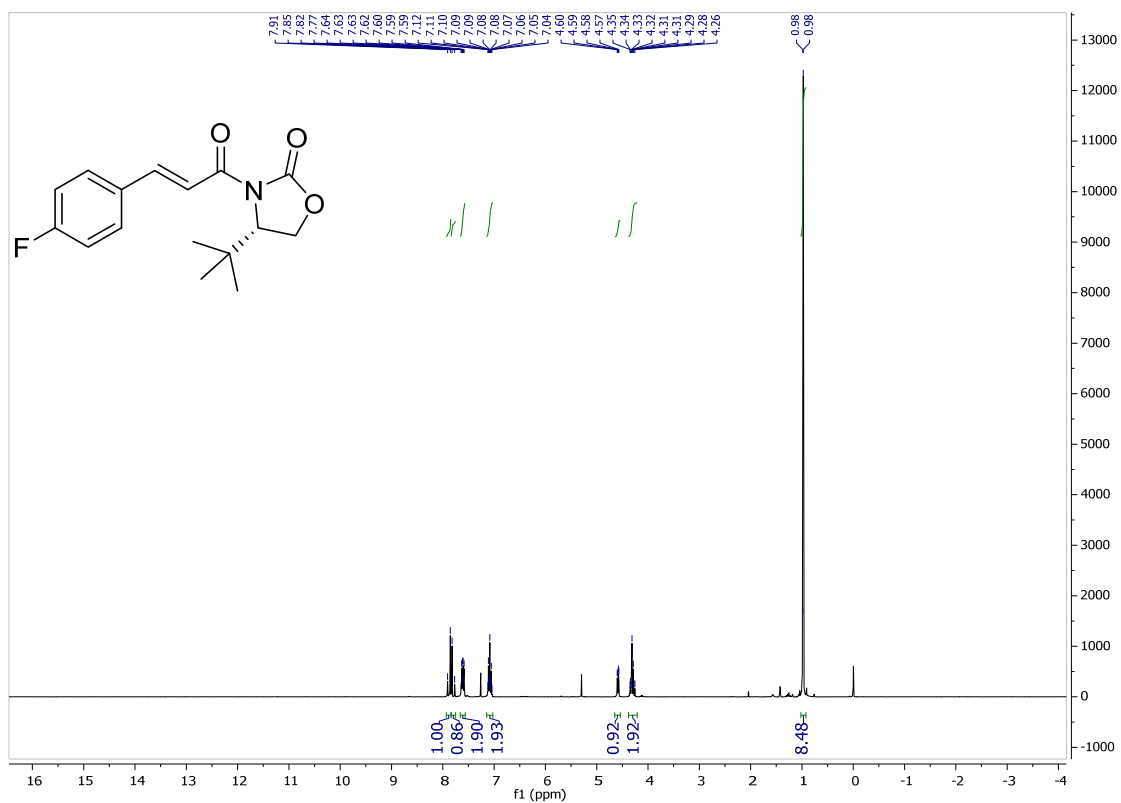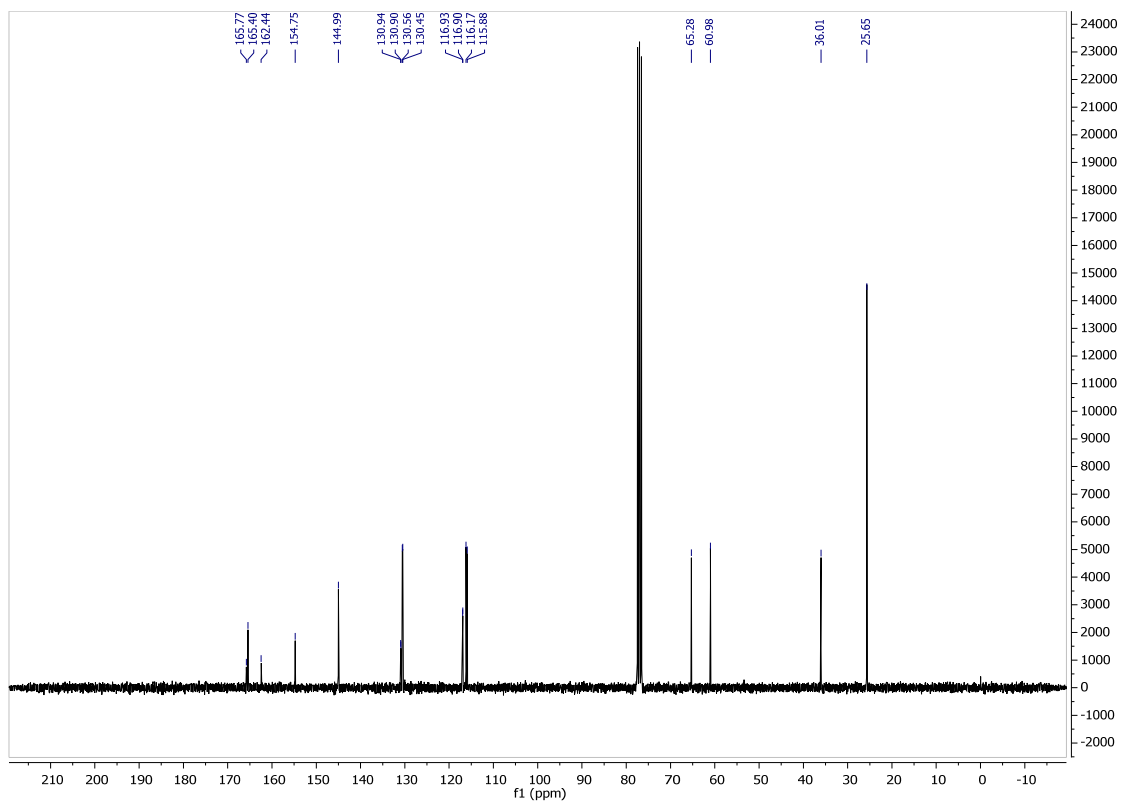

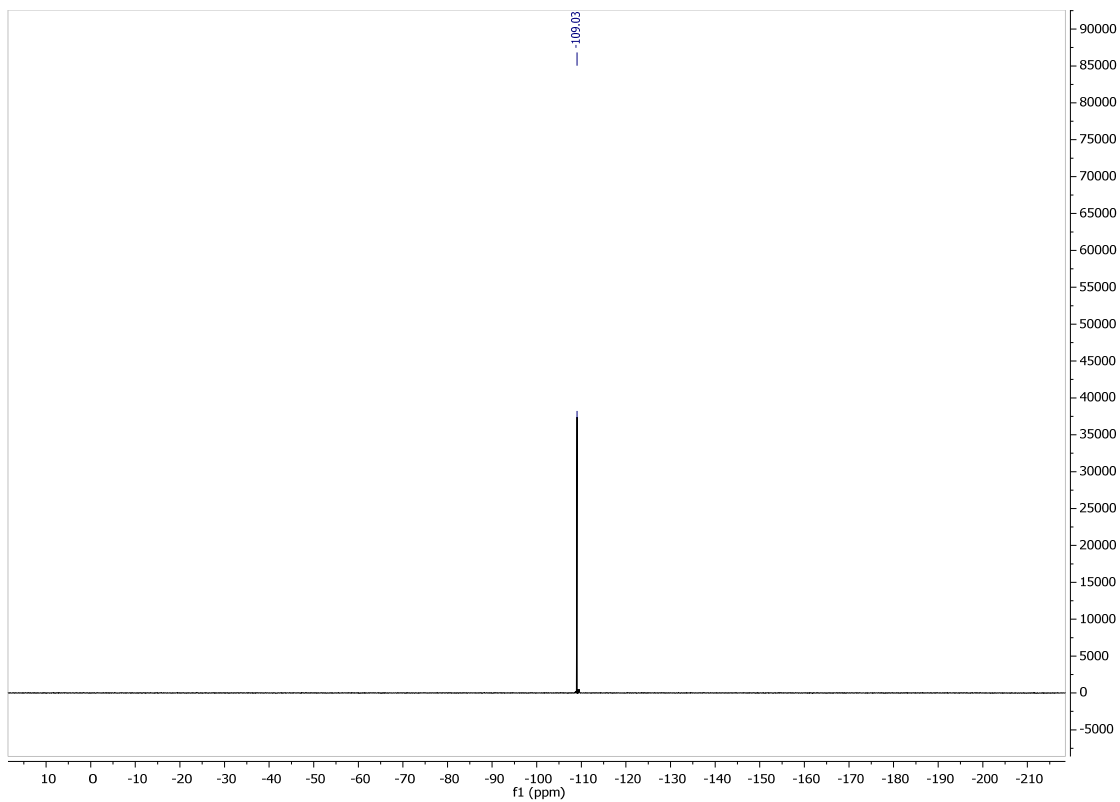

**(S,E)-4-(tert-Butyl)-3-(3-methoxyphenyl)acryloyl oxazolidin-2-one (1k)**

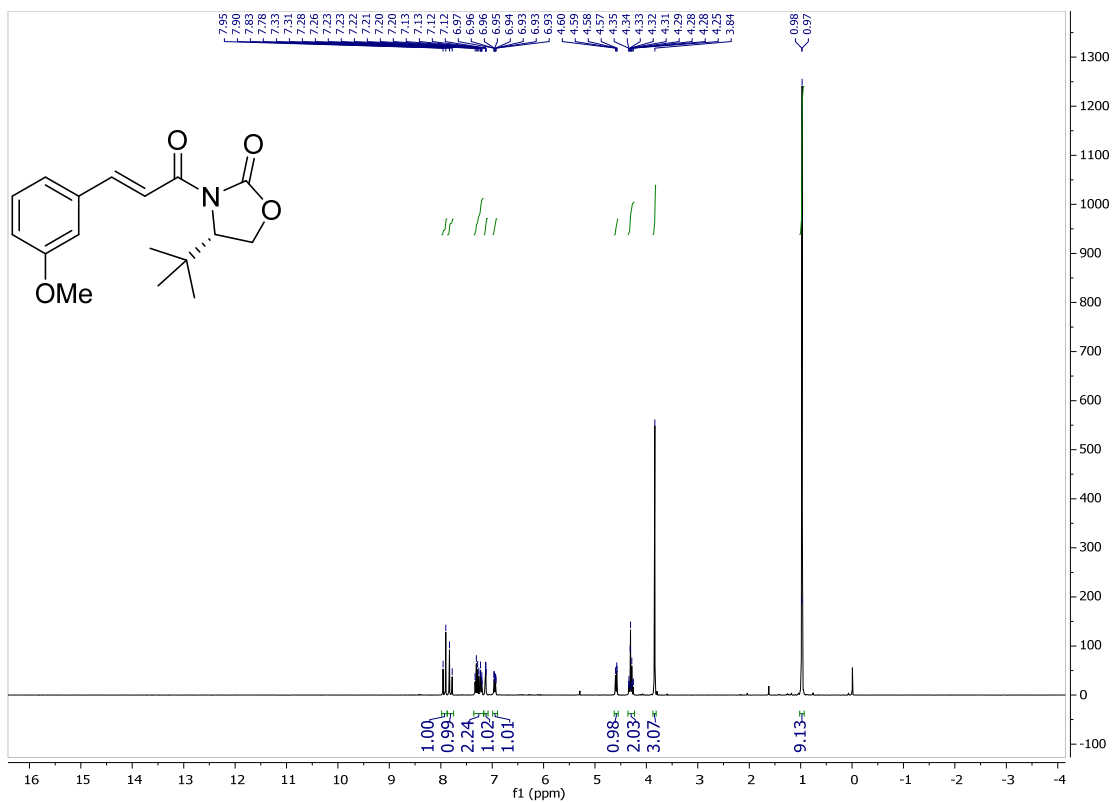

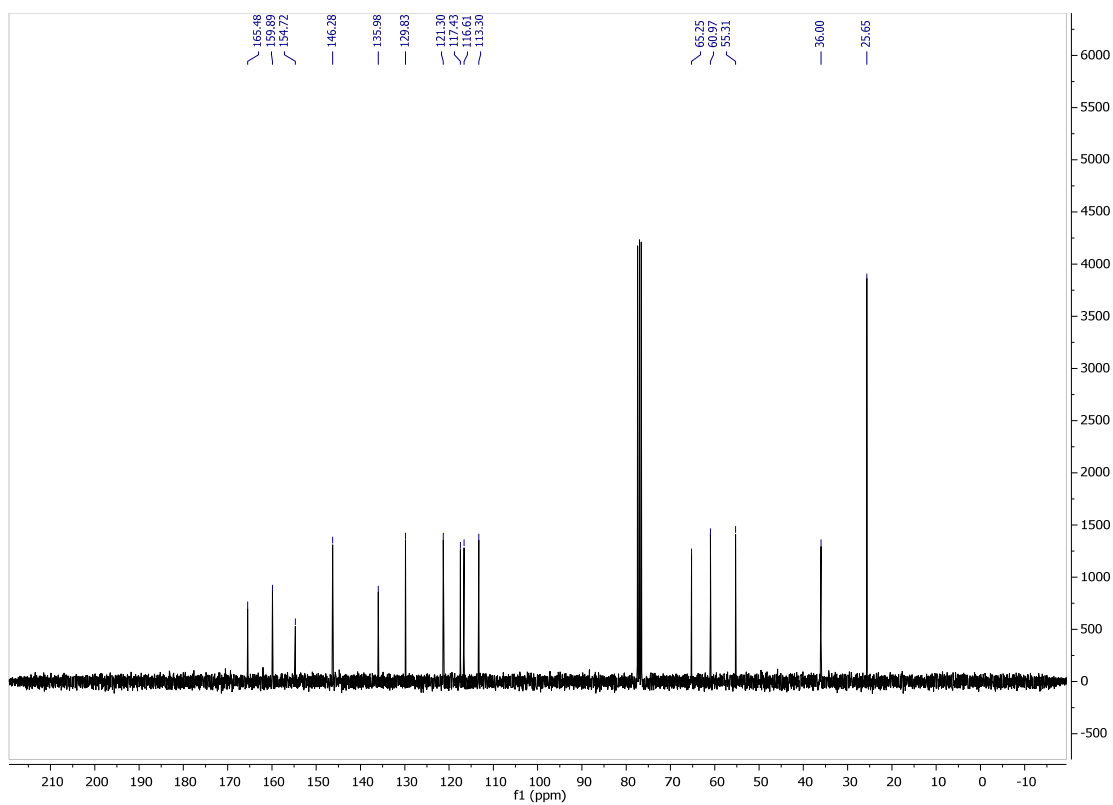

(S,E)-4-(tert-Butyl)-3-(3-(4-methoxyphenyl)acryloyl)oxazolidin-2-one (11)

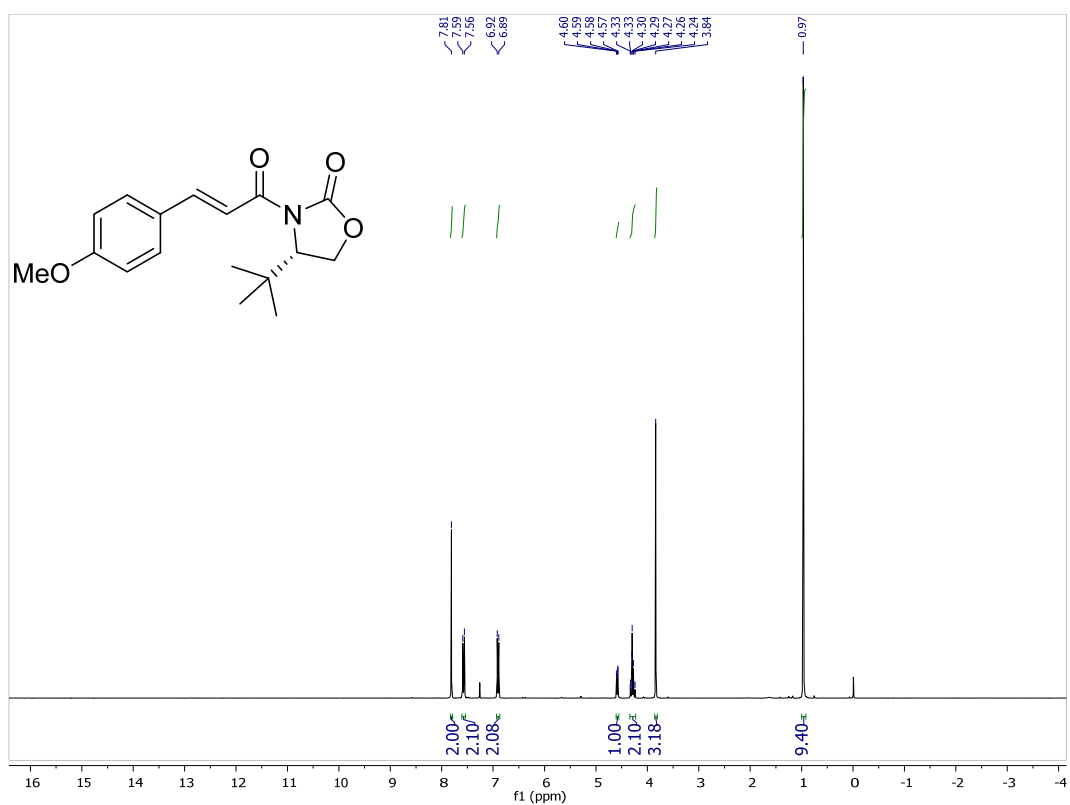

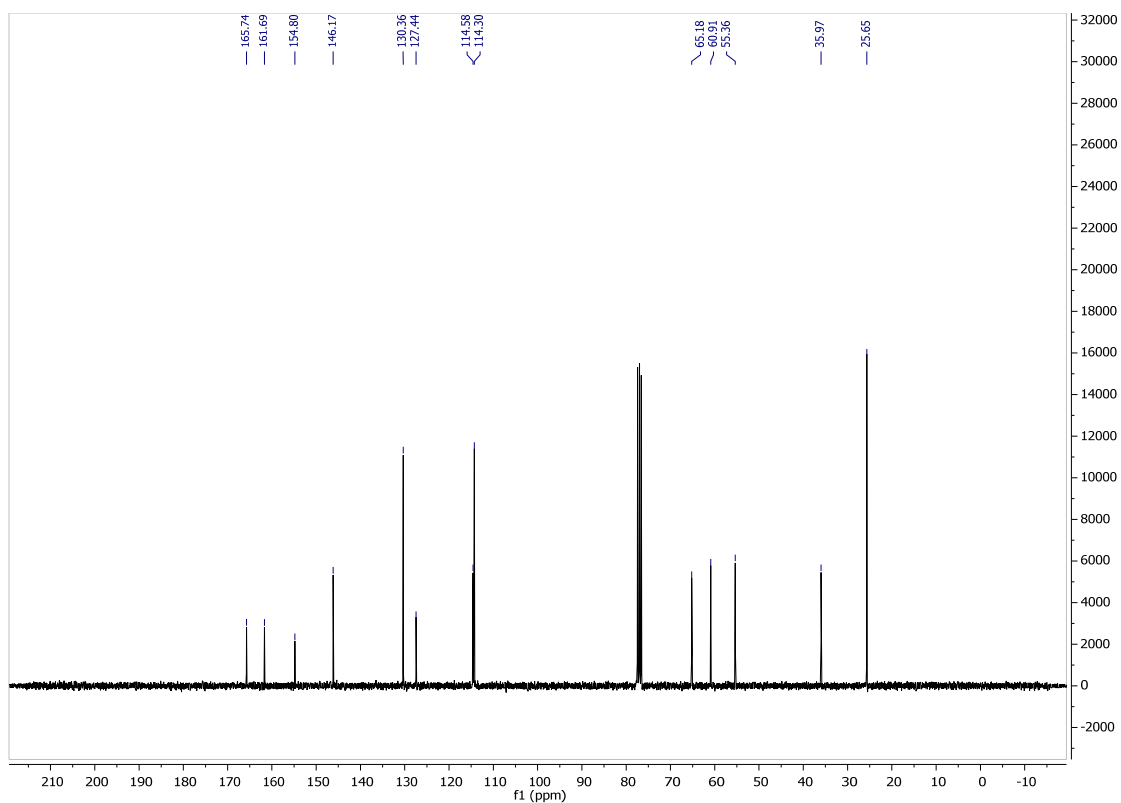

**(S,E)-4-(tert-Butyl)-3-(2-methylpent-2-enyl)oxazolidin-2-one (1m)**

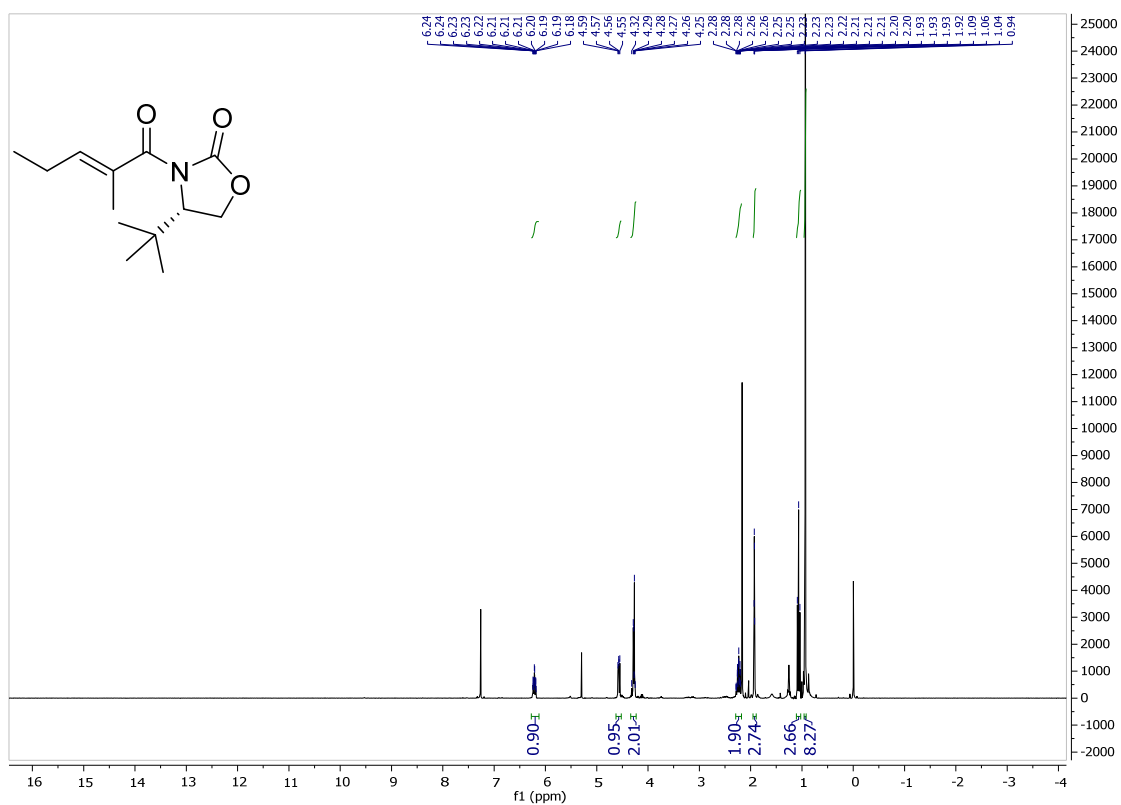

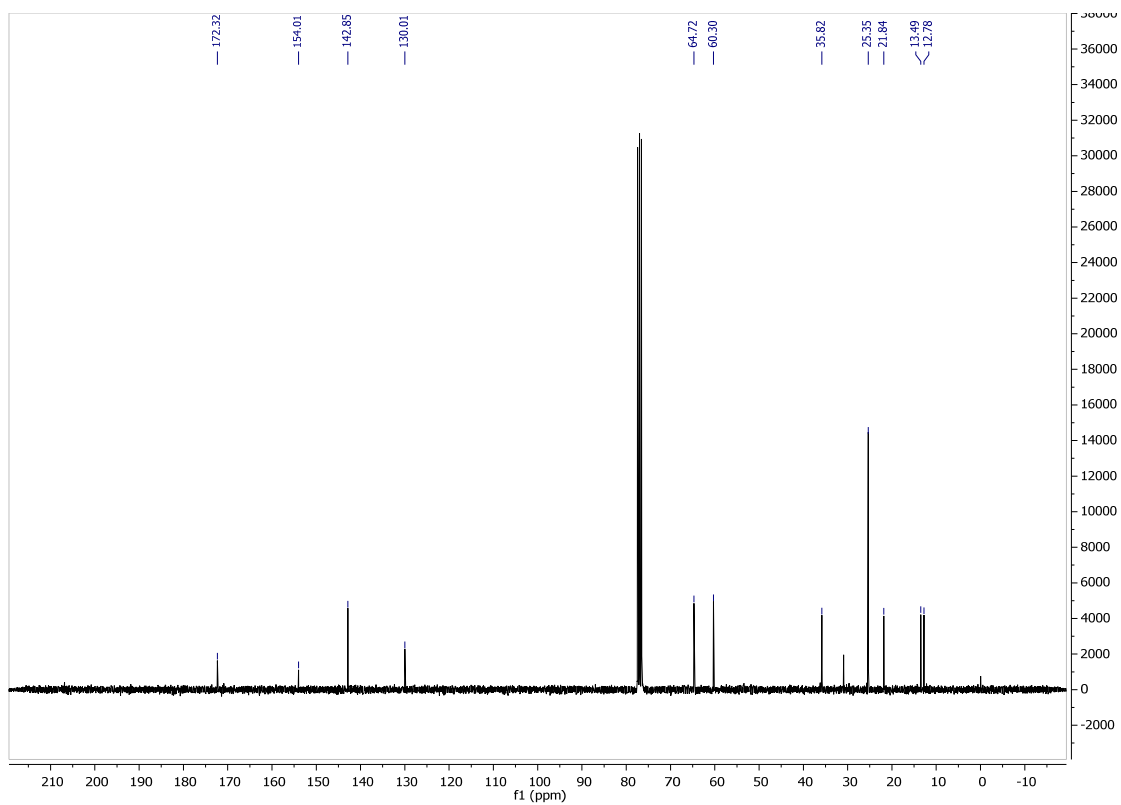

**(S)-4-(tert-Butyl)-3-((S)-3-chlorobutanoyl)oxazolidin-2-one (3b)**

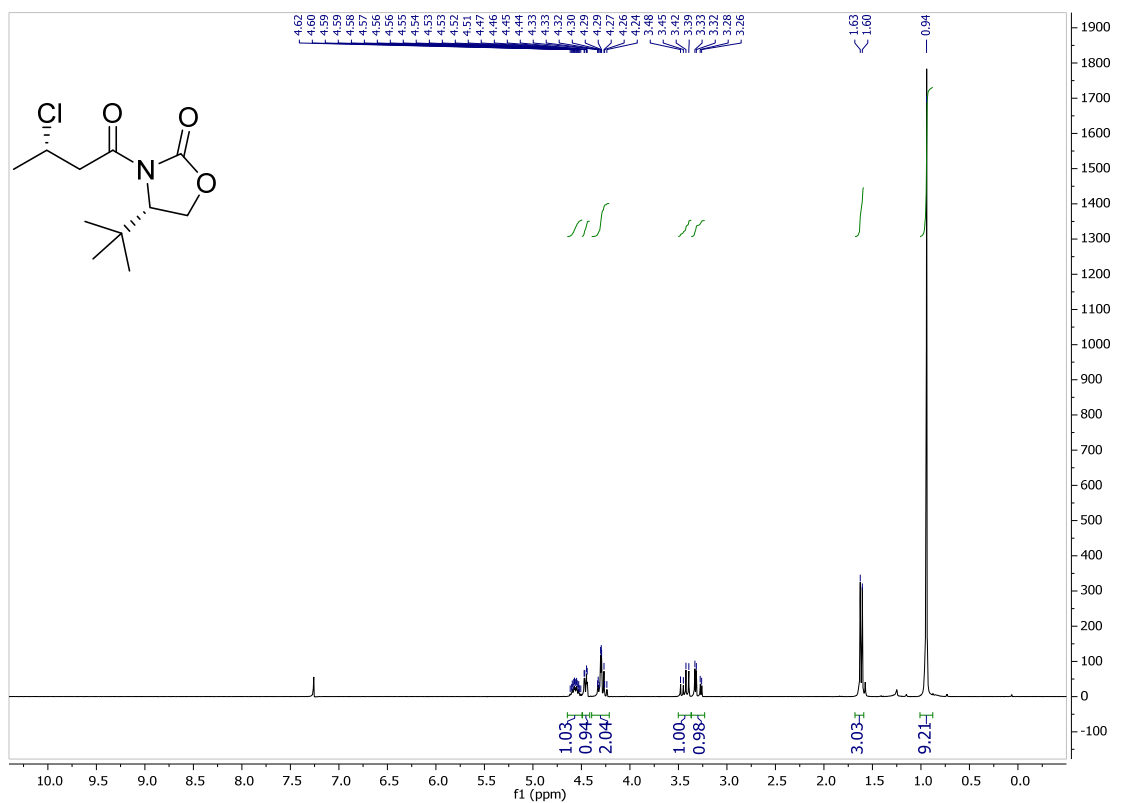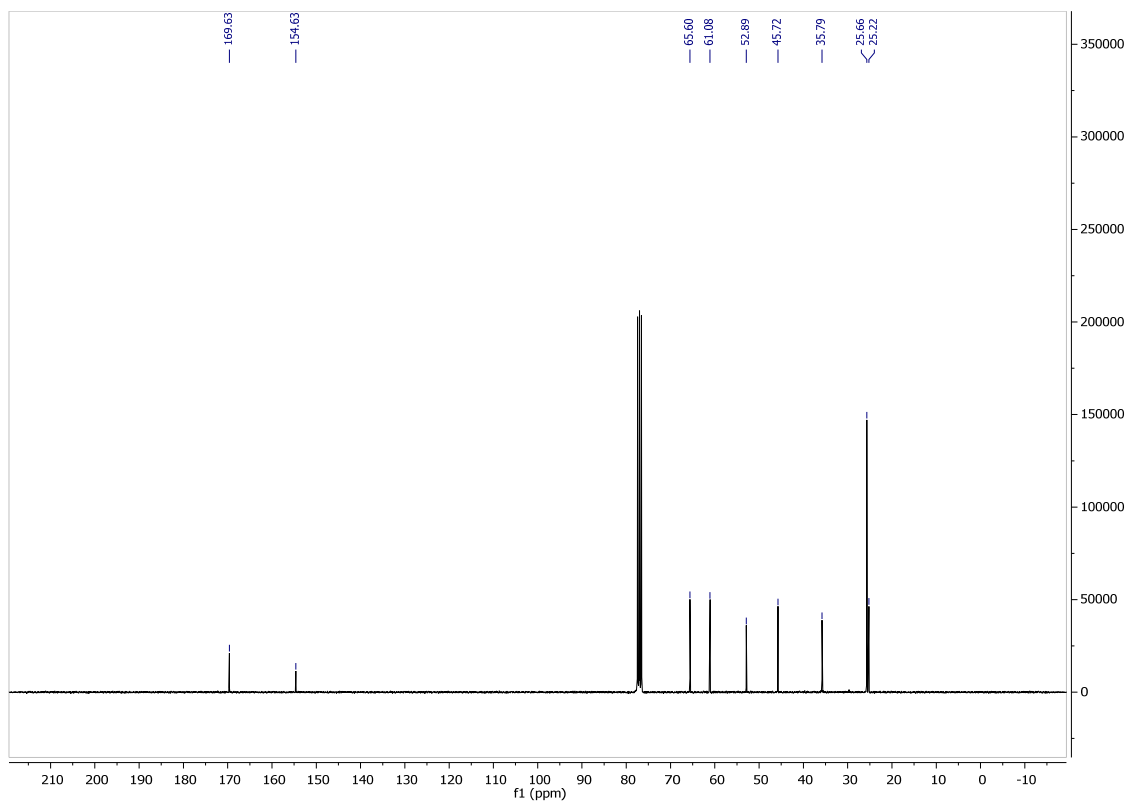

**(S)-4-(tert-Butyl)-3-((S)-3-chloropentanoyl)oxazolidin-2-one (3c)**

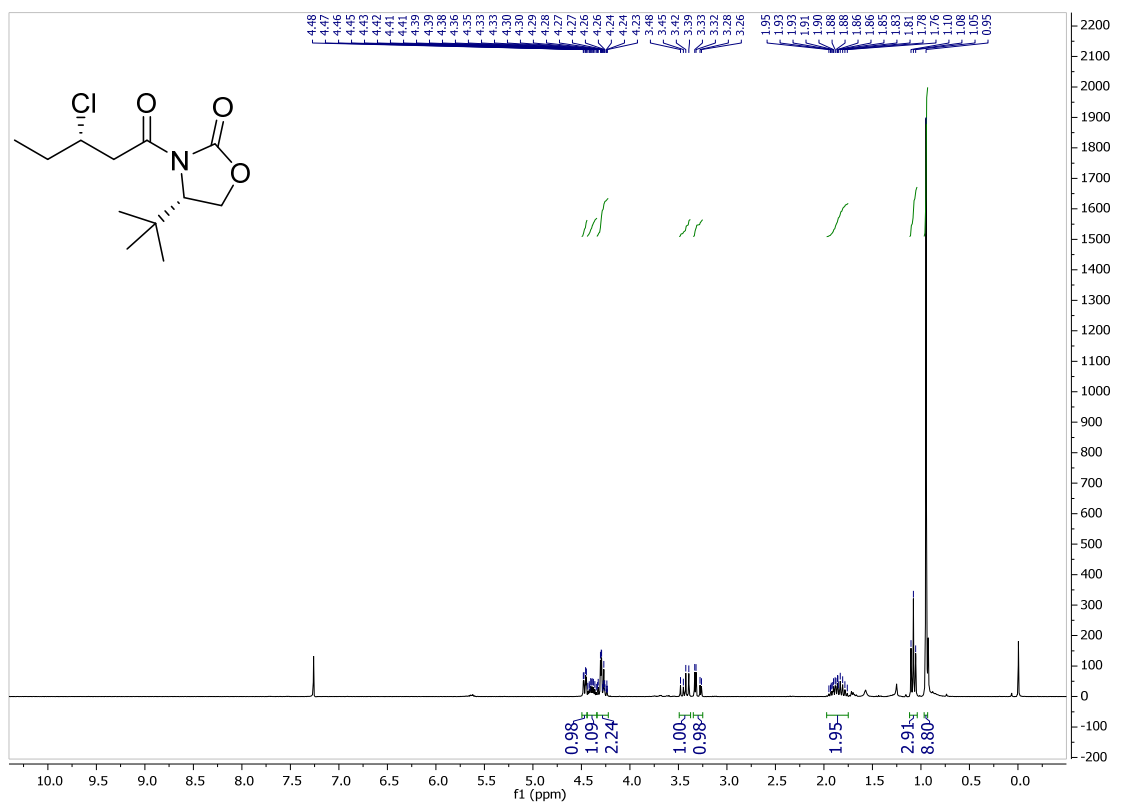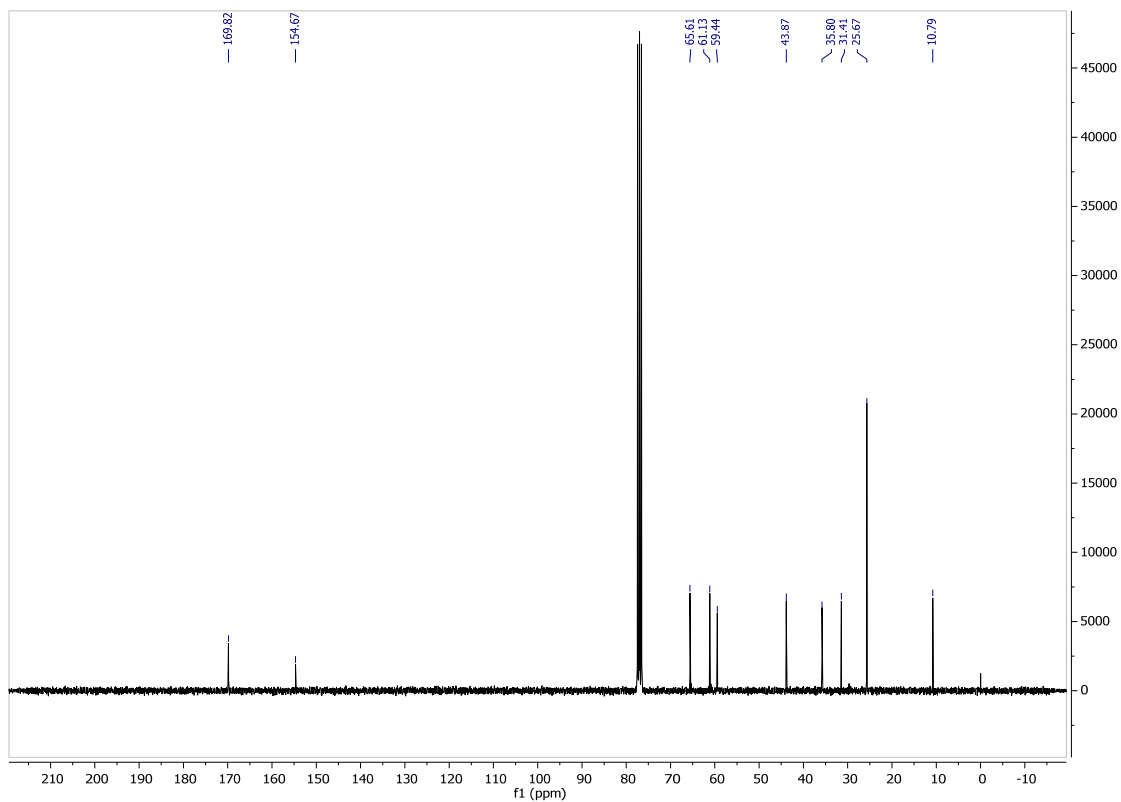

**(S)-4-(tert-Butyl)-3-((S)-3-chlorooctanoyl)oxazolidin-2-one (3d)**

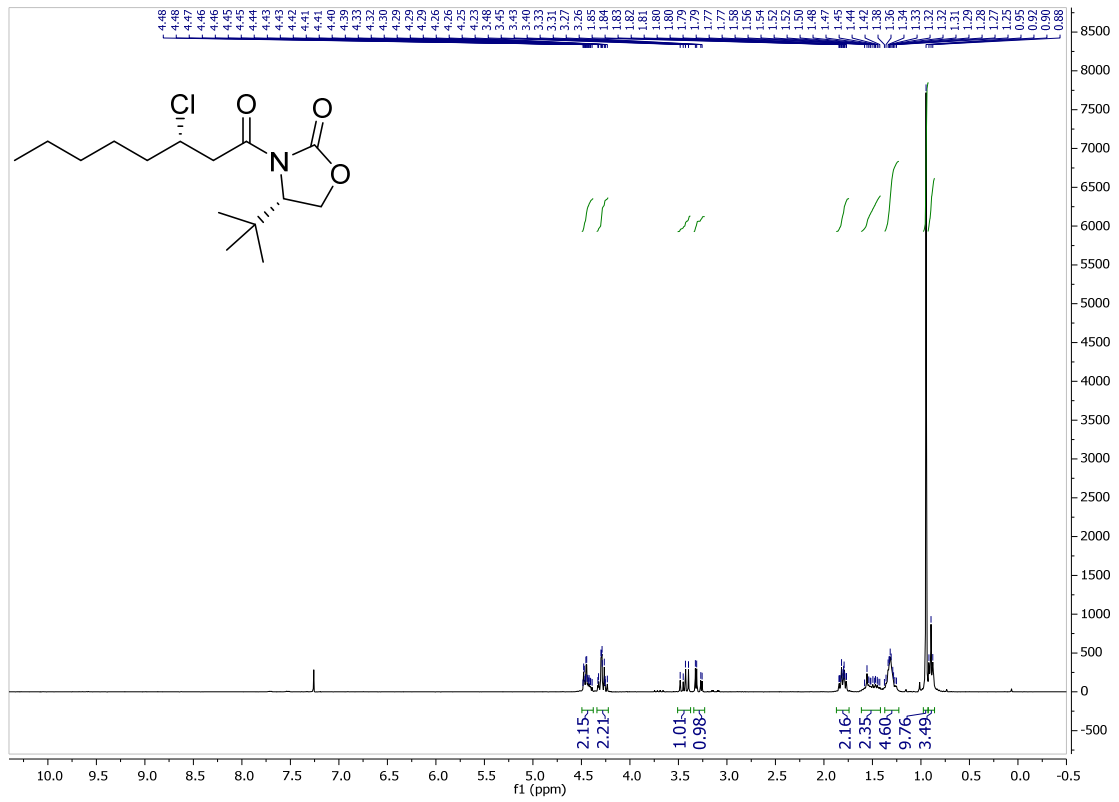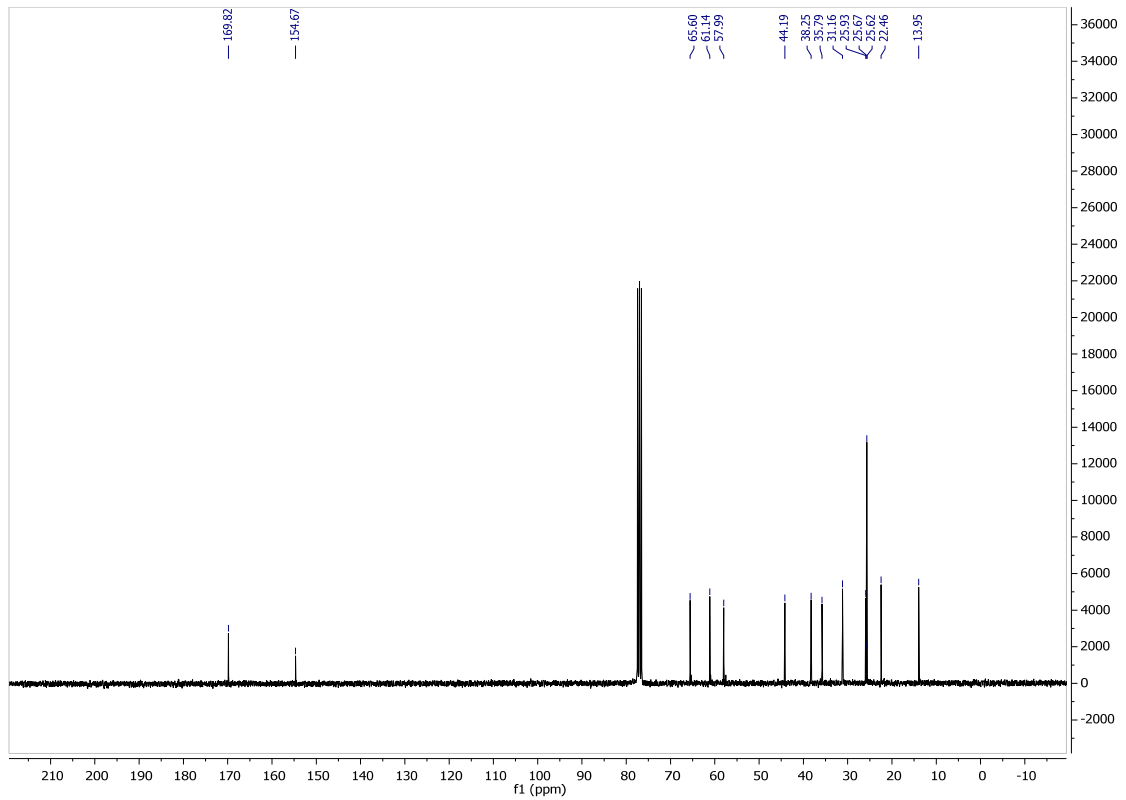



**(S)-4-(tert-butyl)-3-((R)-3-chloro-4-methylpentanoyl)oxazolidin-2-one (3e)**

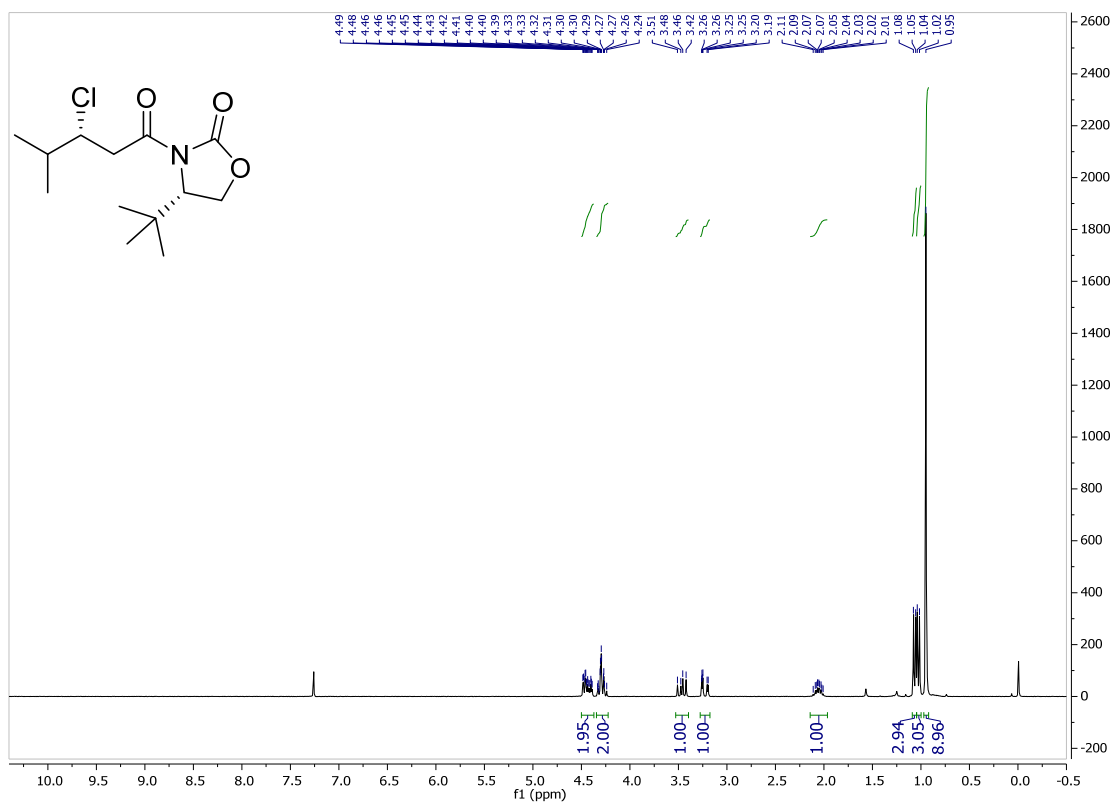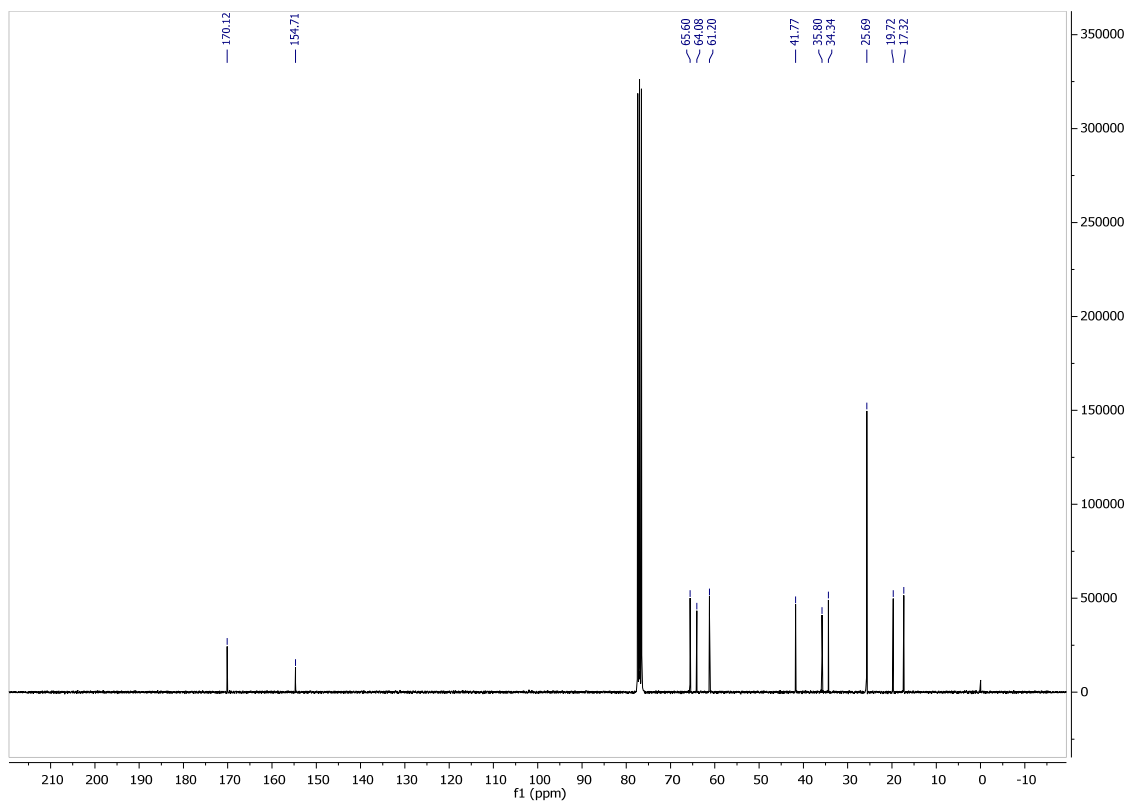

**(S)-3-((S)-3-Bromobutanoyl)-4-(tert-butyl)oxazolidin-2-one (4a)**

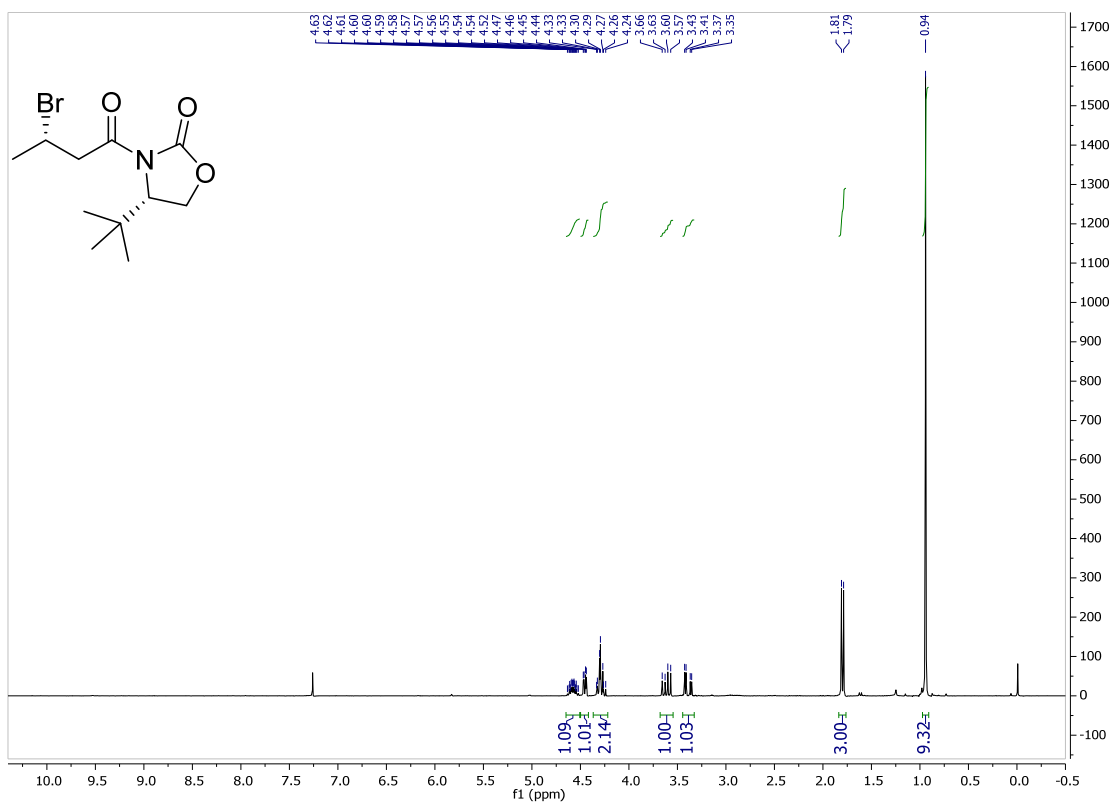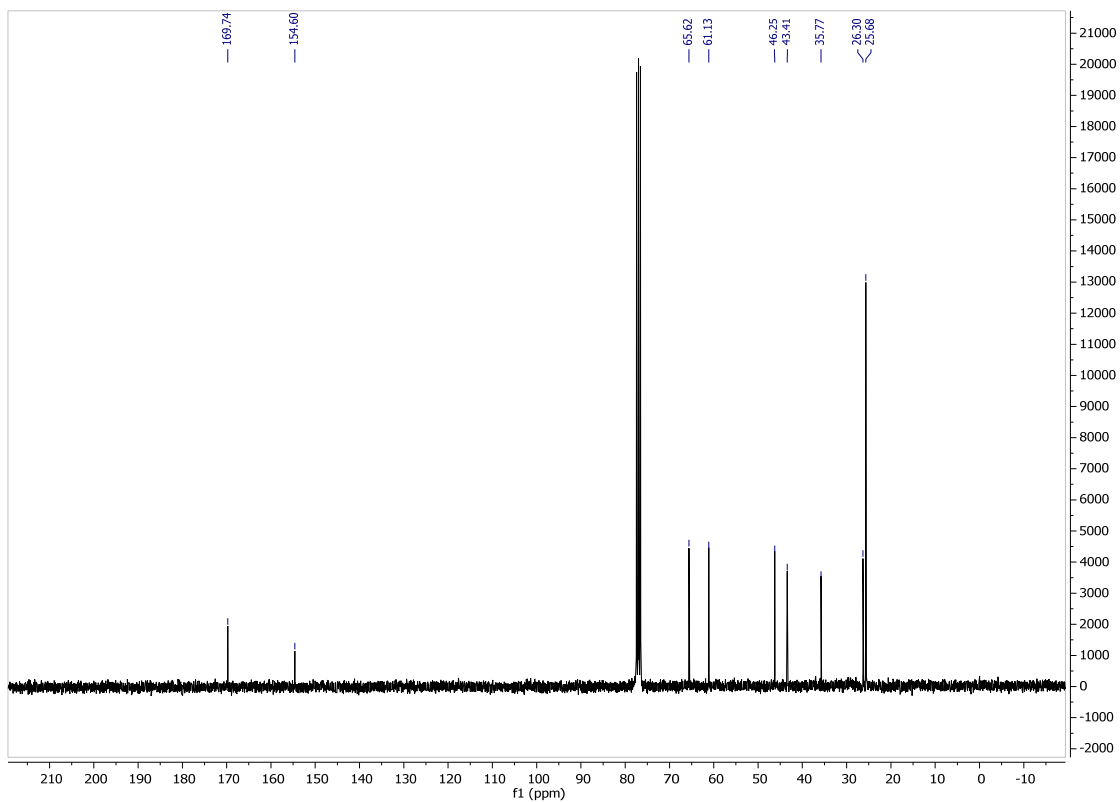

**(S)-3-((R)-3-Bromo-4-methylpentanoyl)-4-(tert-butyl)oxazolidin-2-one (4b)**

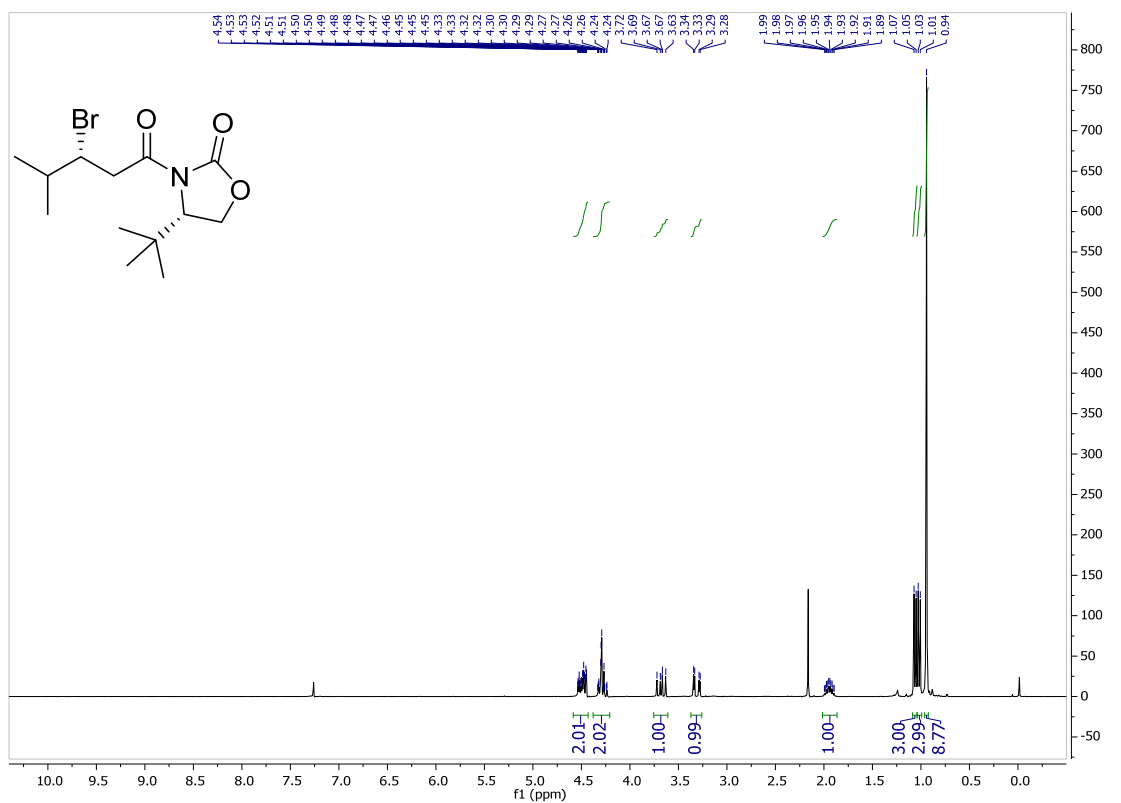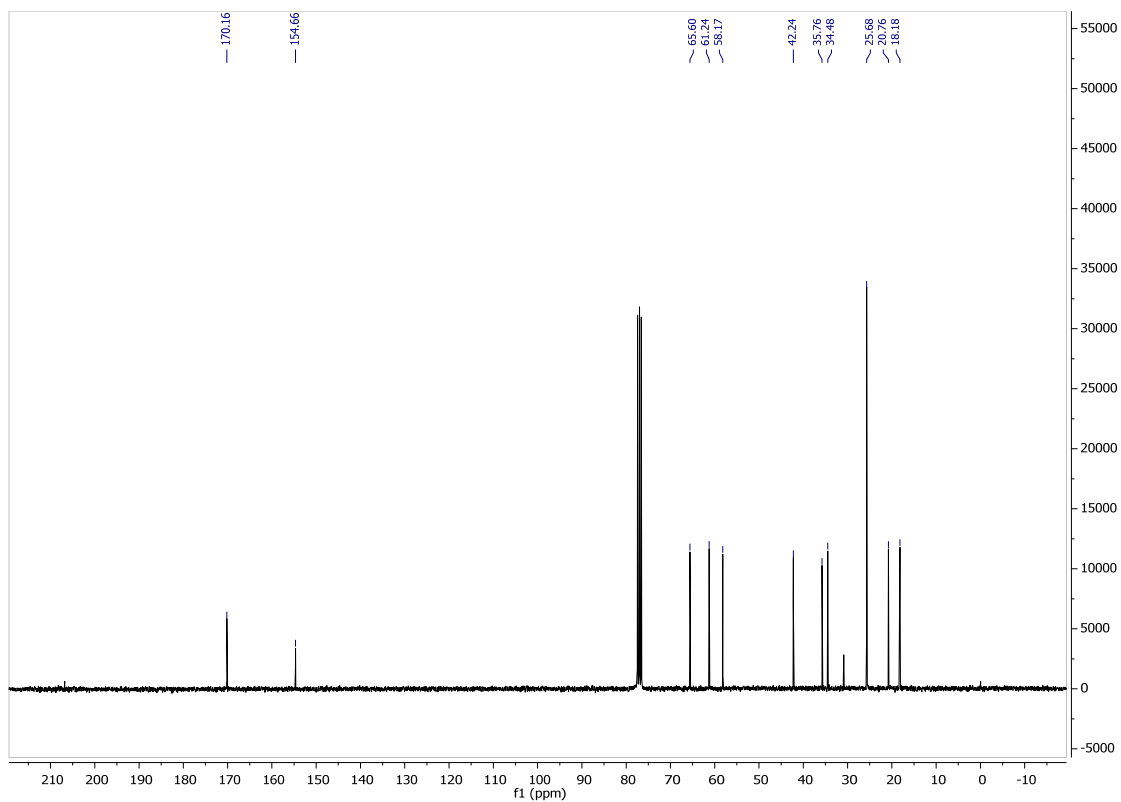

**(S)-3-((R)-3-Bromo-3-phenylpropanoyl)-4-(tert-butyl)oxazolidin-2-one (4c)**

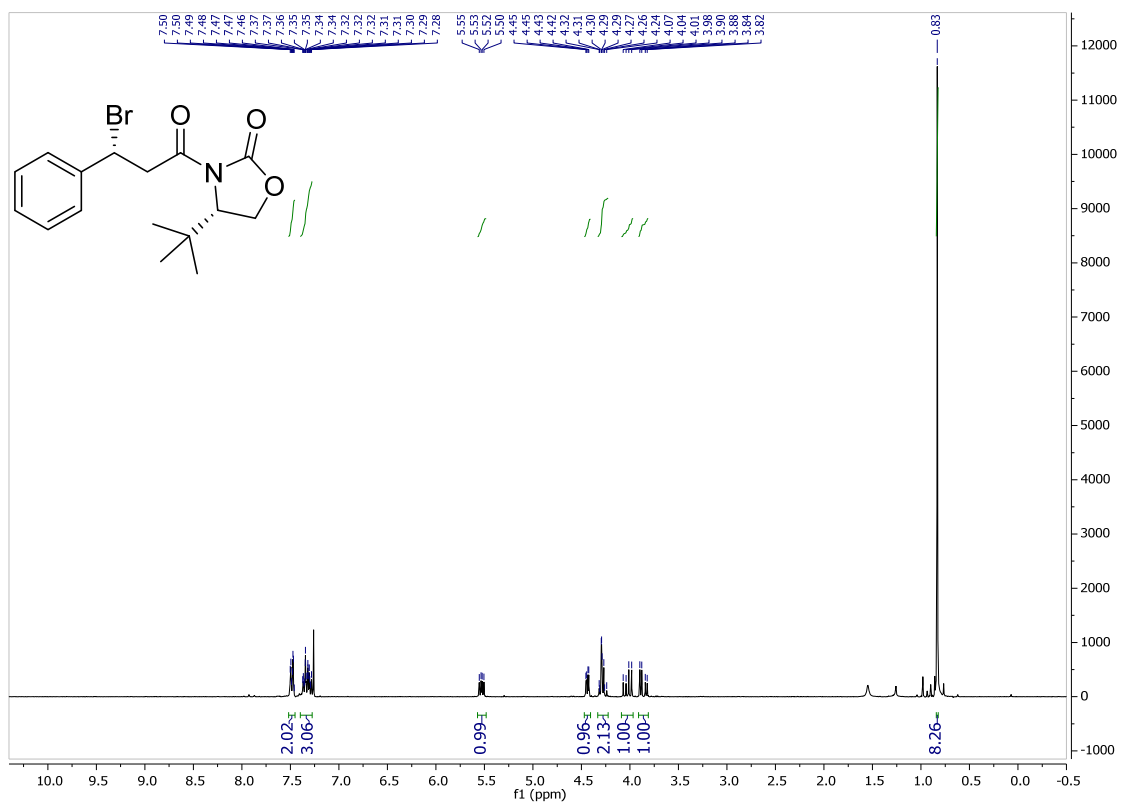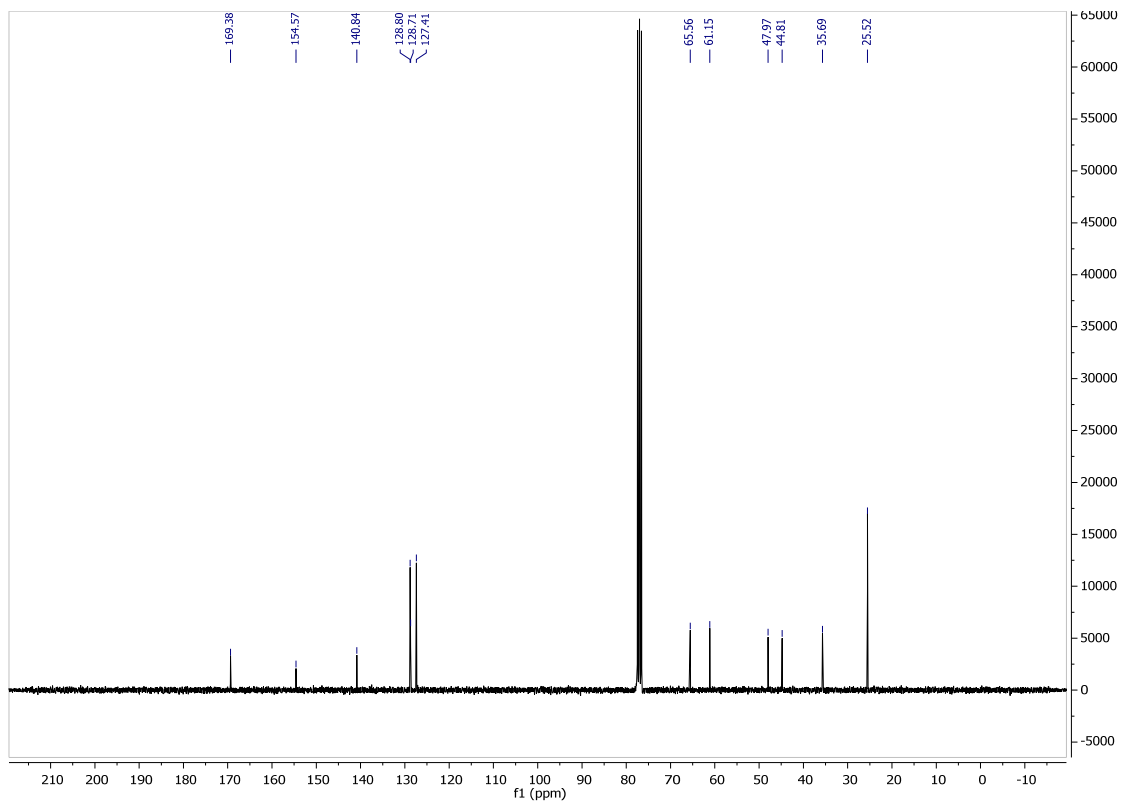

**(S)-3-((R)-3-Bromo-3-(4-nitrophenyl)propanoyl)-4-(tert-butyl)oxazolidin-2-one (4d)**

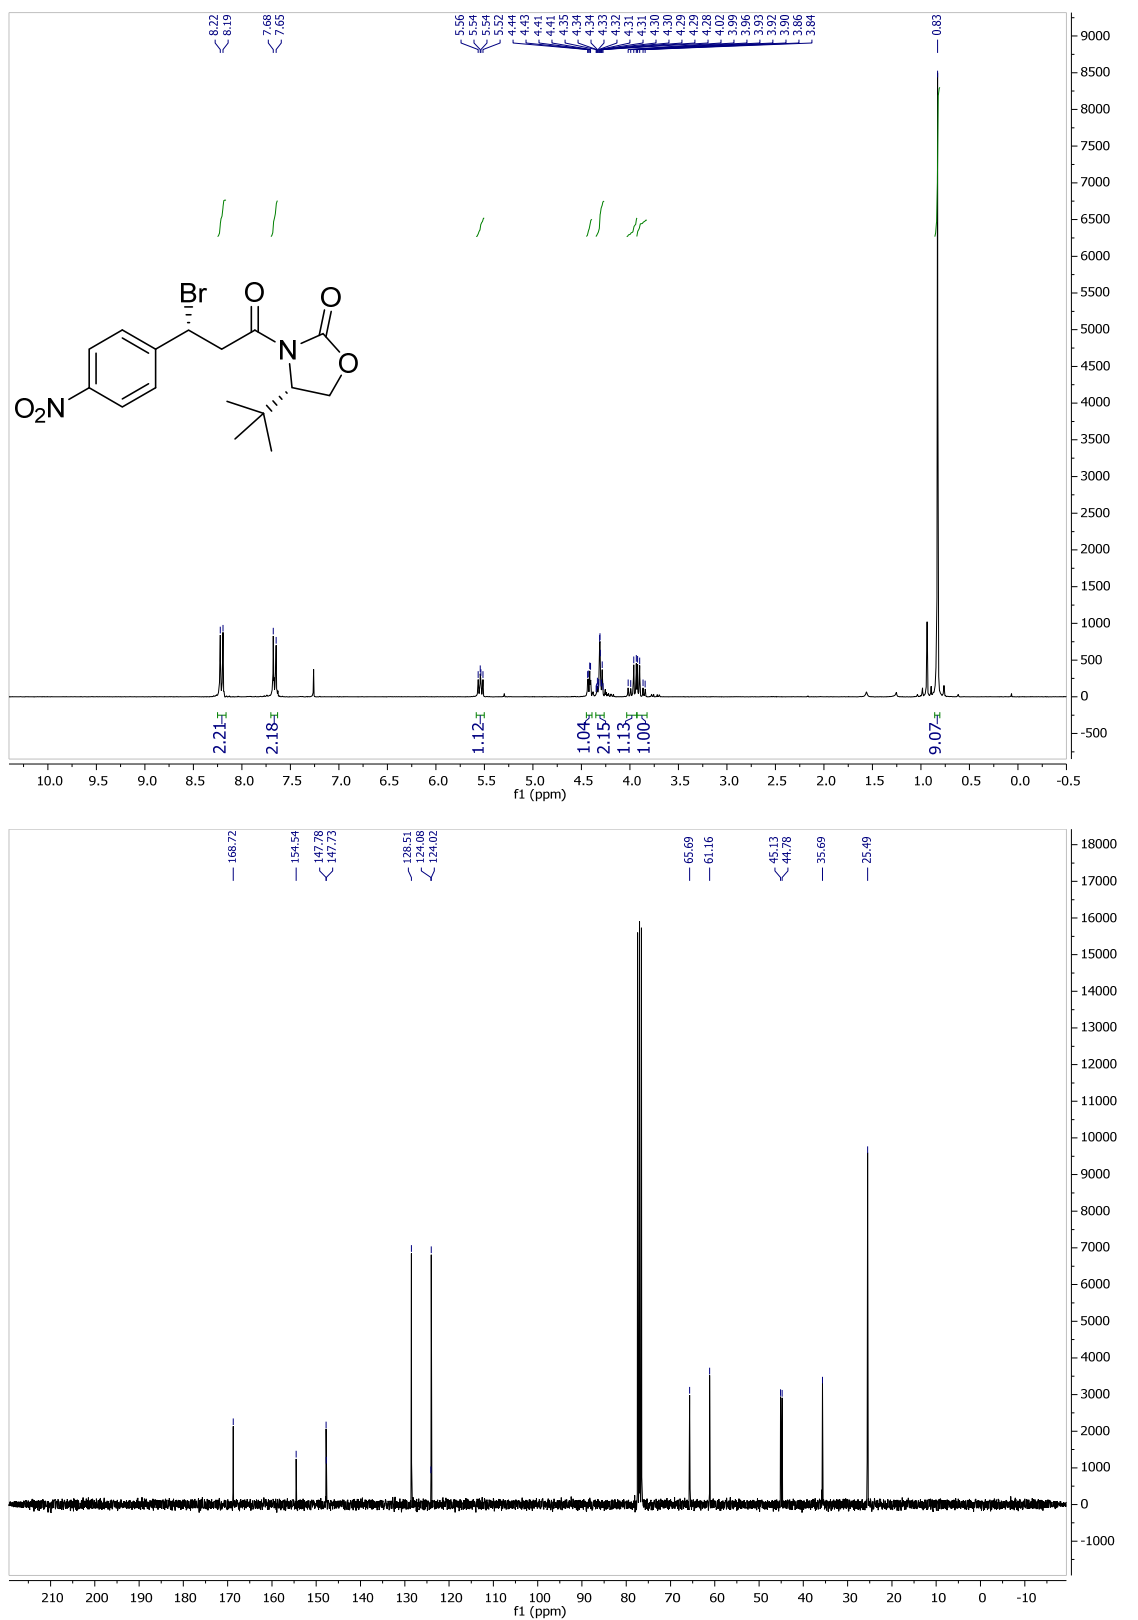

**(S)-3-((R)-3-Bromo-3-(2-chlorophenyl)propanoyl)-4-(tert-butyl)oxazolidin-2-one (4e)**

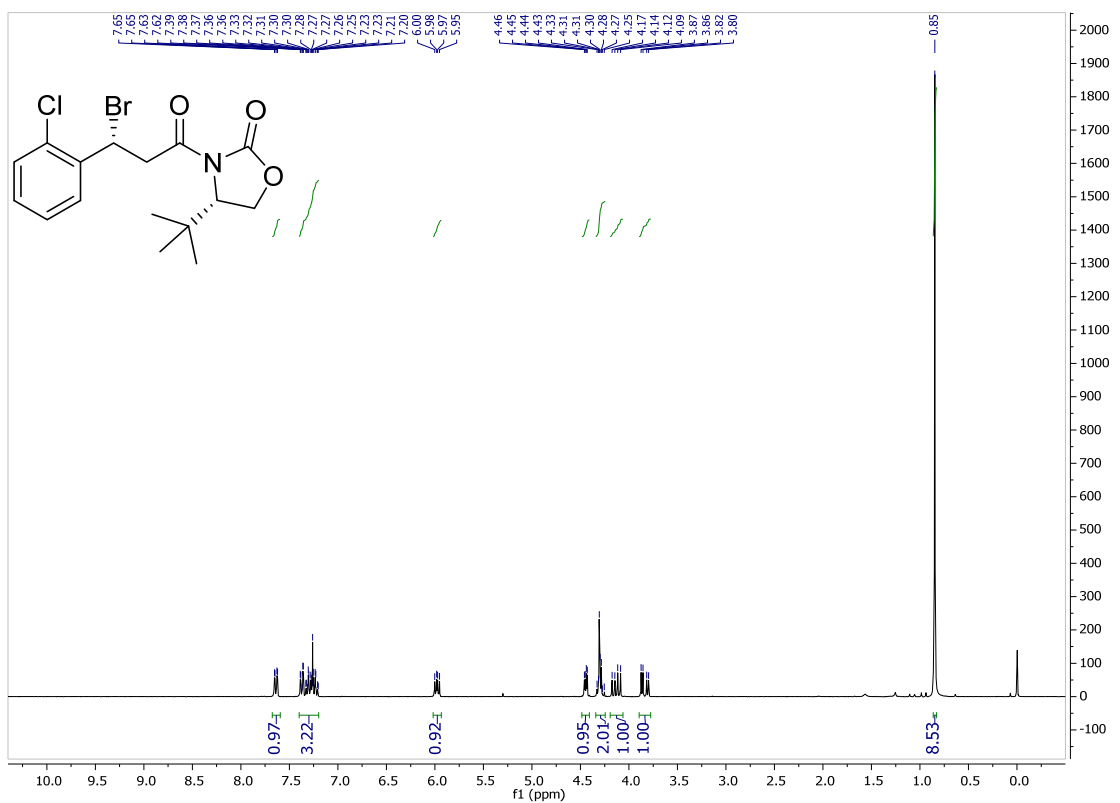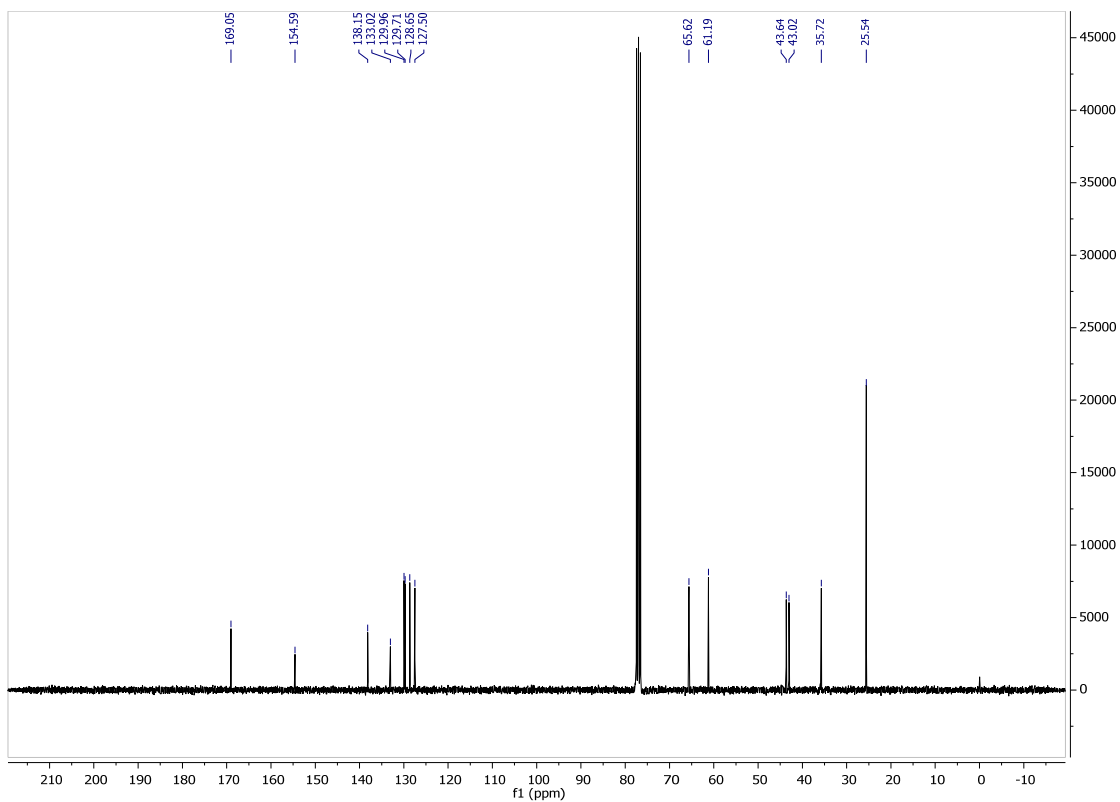

**(S)-3-((R)-3-Bromo-3-(4-chlorophenyl)propanoyl)-4-(tert-butyl)oxazolidin-2-one (4f)**

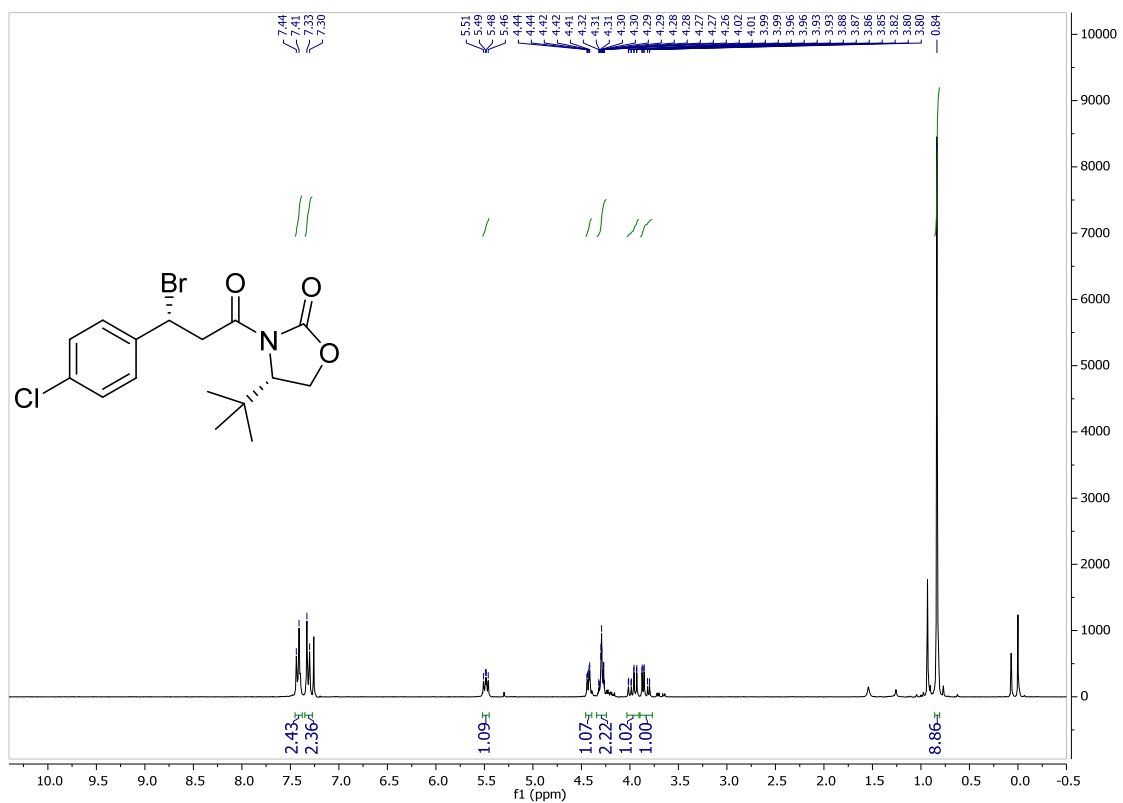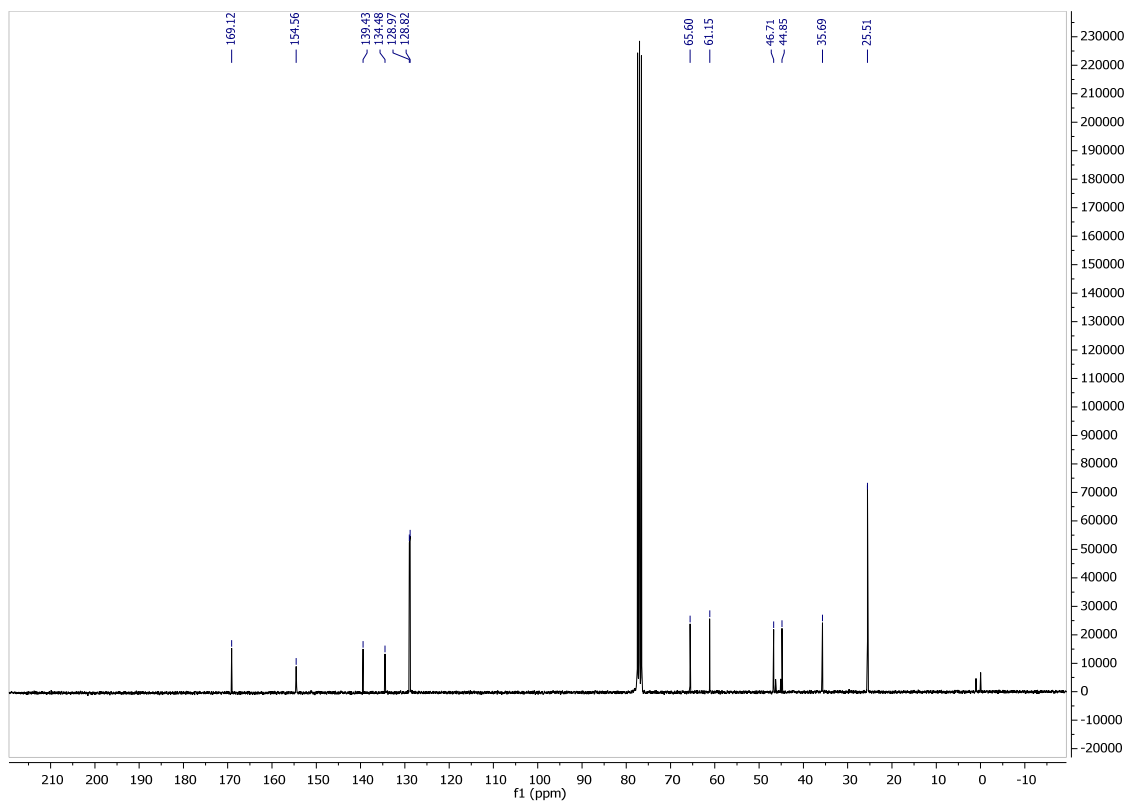

**(S)-3-((R)-3-Bromo-3-(4-fluorophenyl)propanoyl)-4-(tert-butyl)oxazolidin-2-one (4g)**

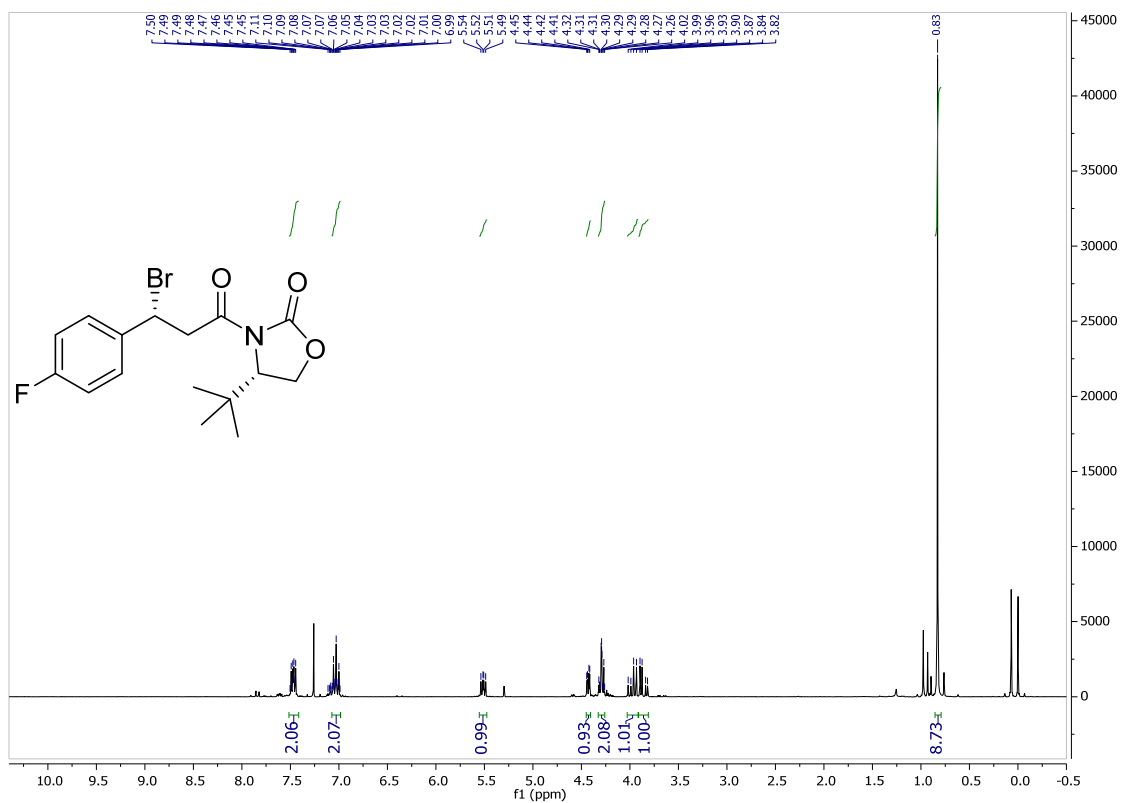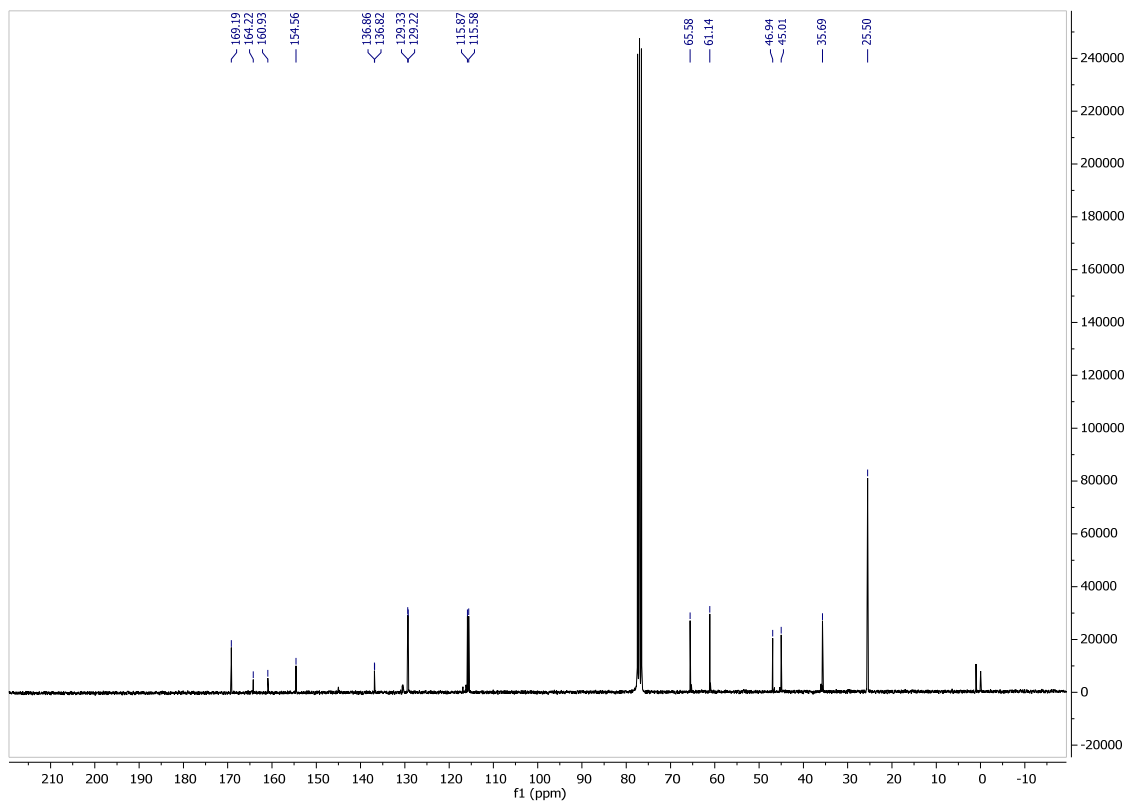



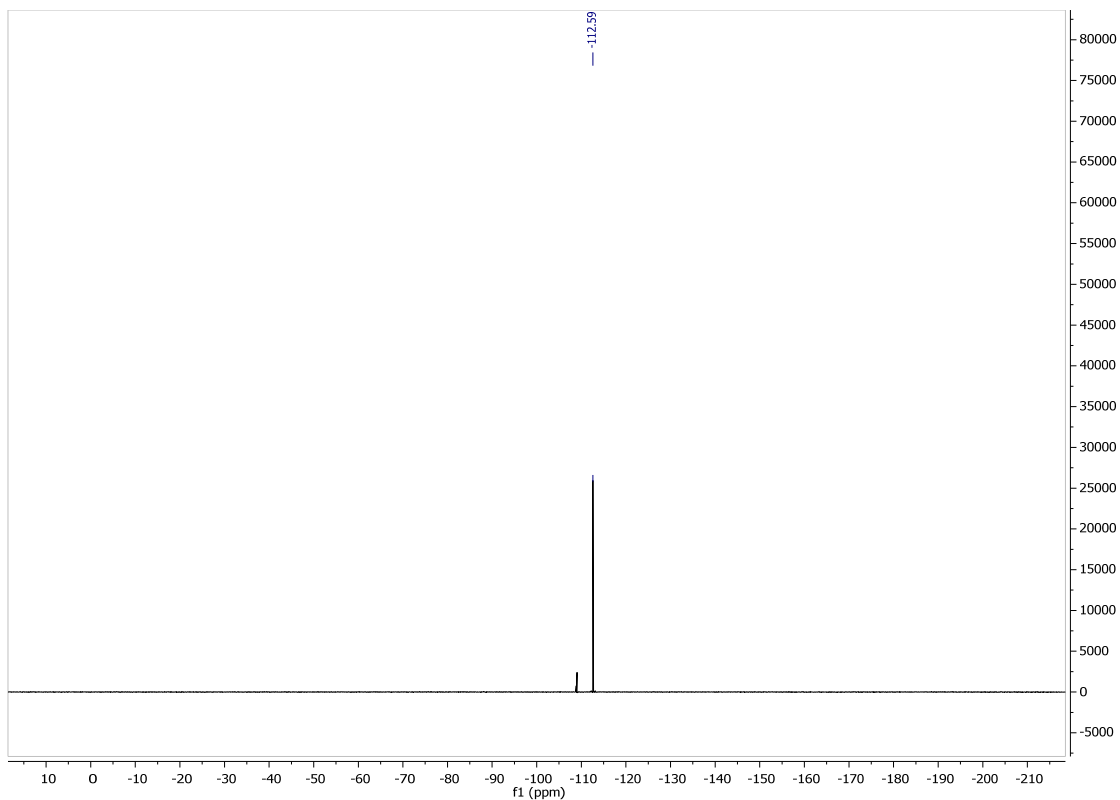

**(S)-3-((R)-3-Bromo-3-(3-methoxyphenyl)propanoyl)-4-(tert-butyl)oxazolidin-2-one (4h)**

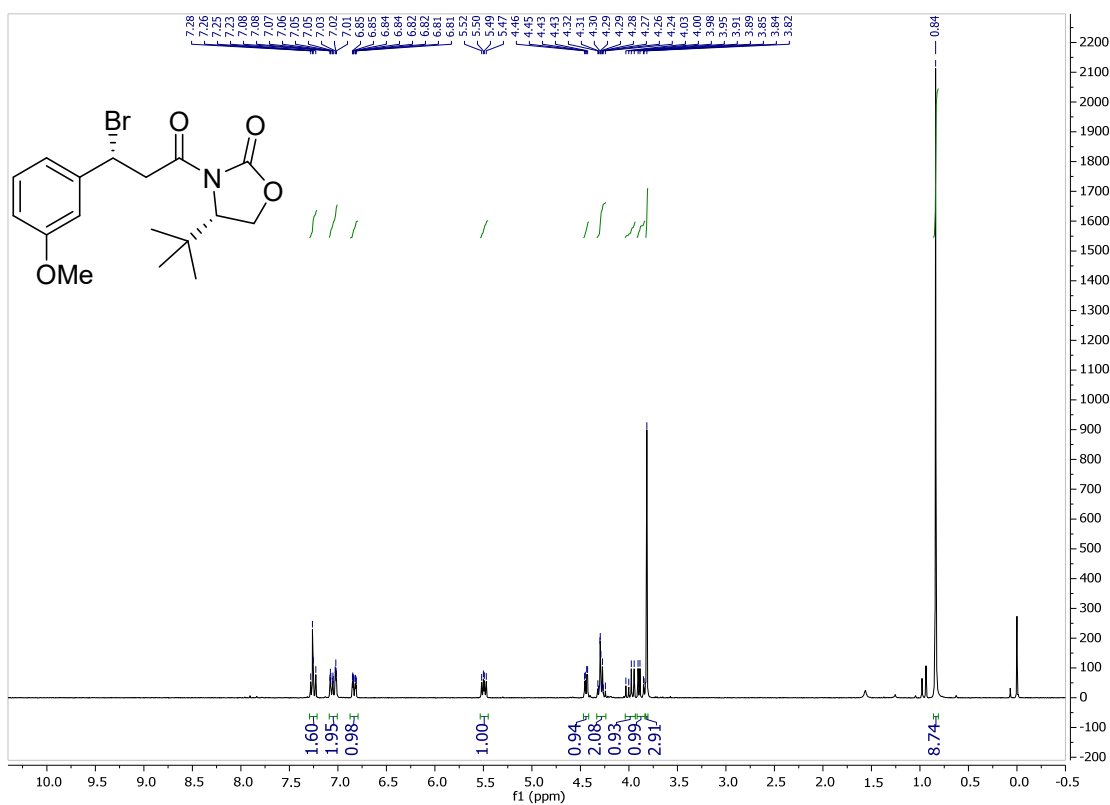

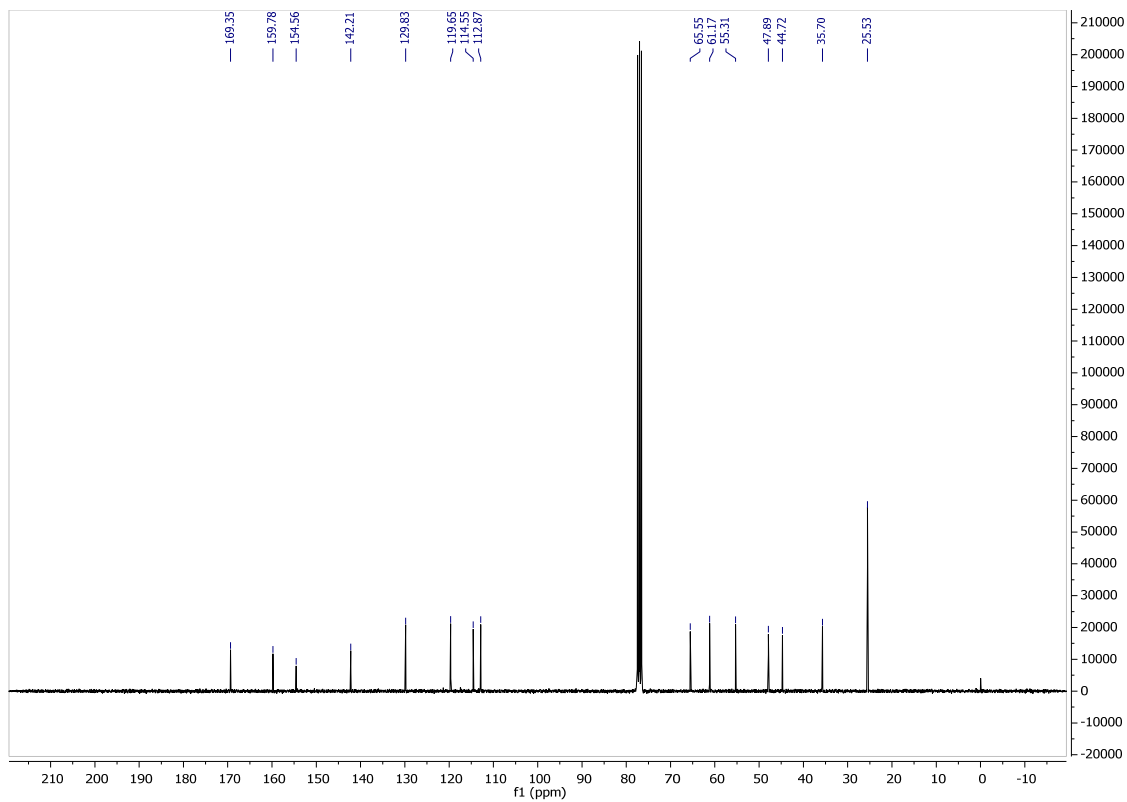

**(S)-3-((2S,3S)-3-Bromo-2-methylpentanoyl)-4-(tert-butyl)oxazolidin-2-one (4i)**

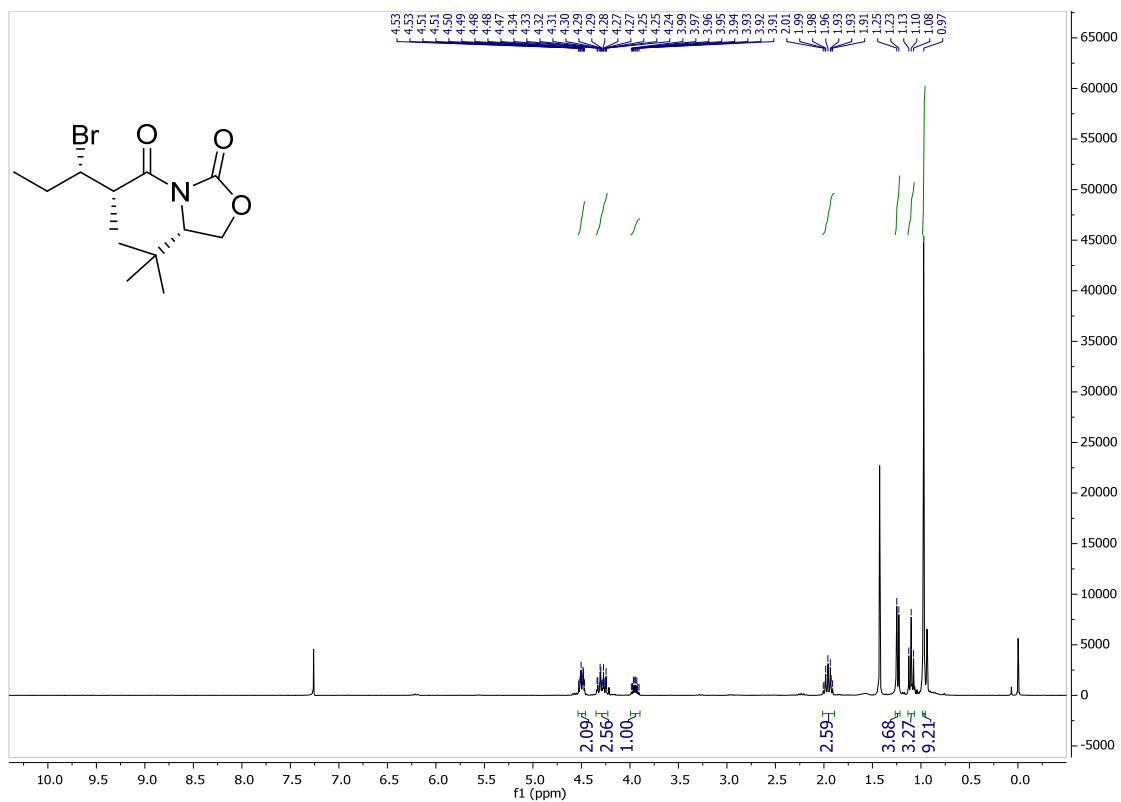

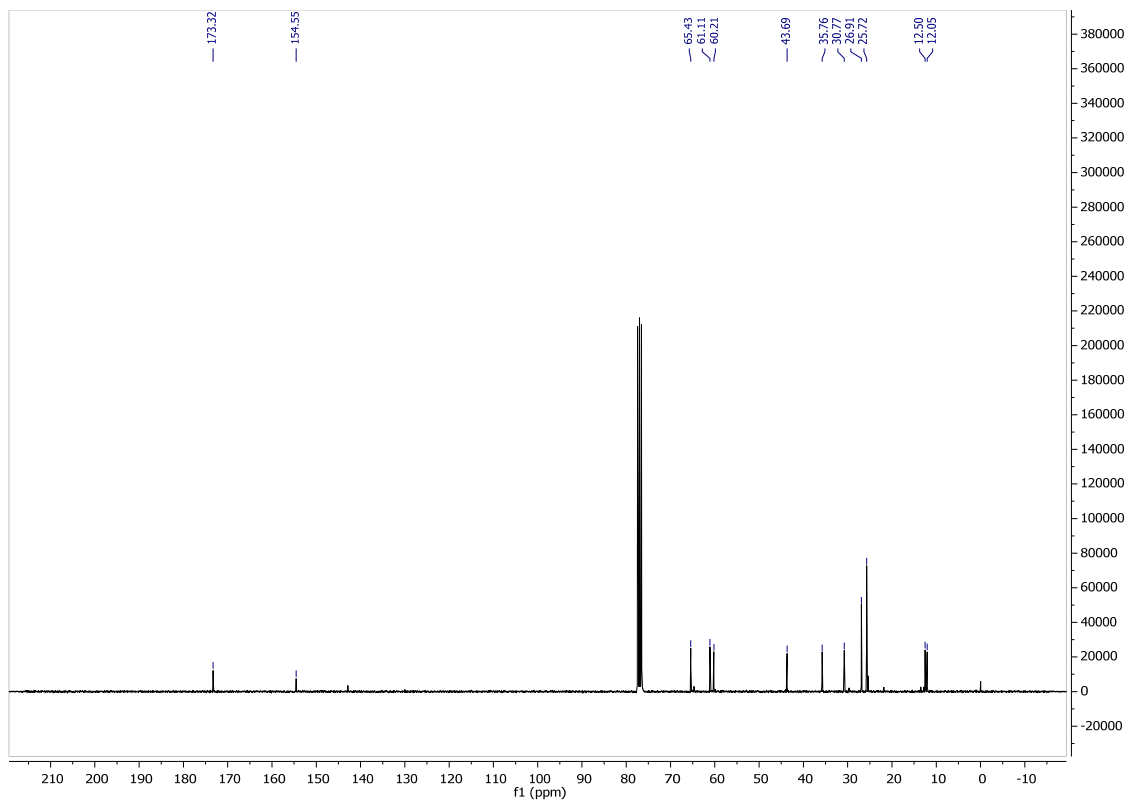

### 3-Bromobutanenitrile (7a)

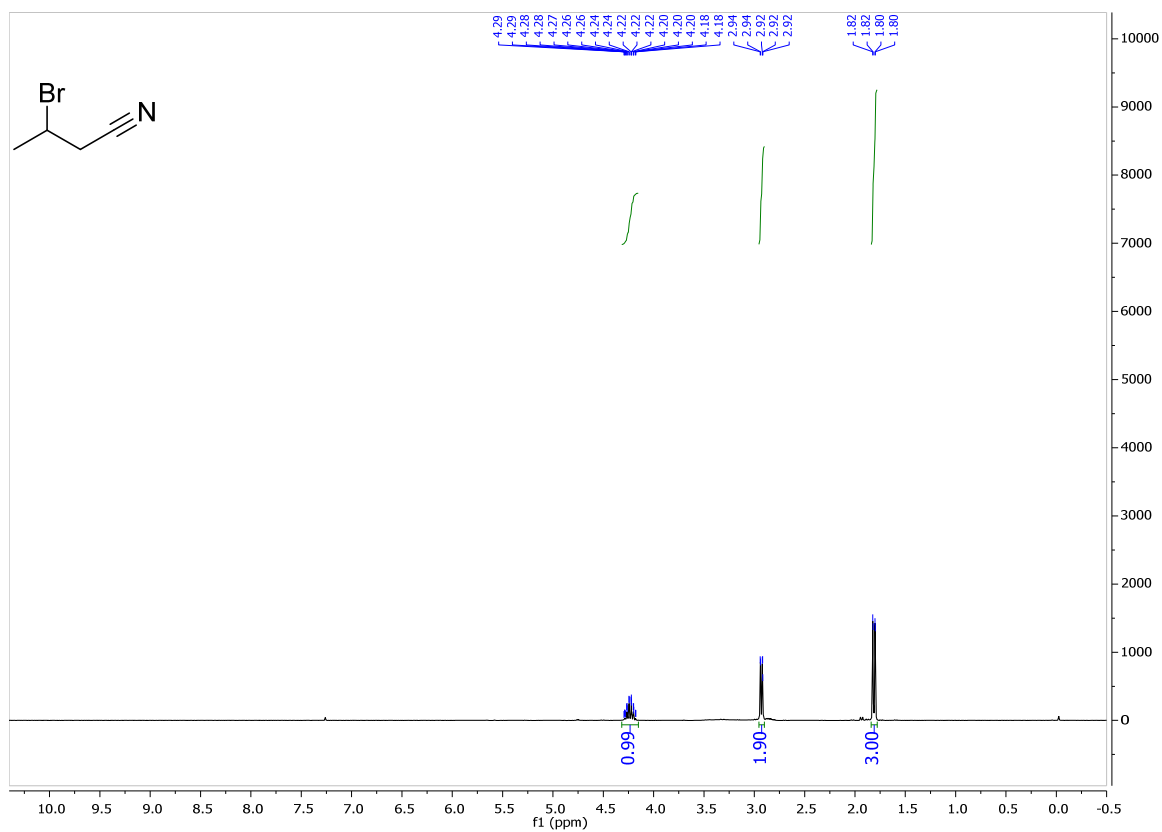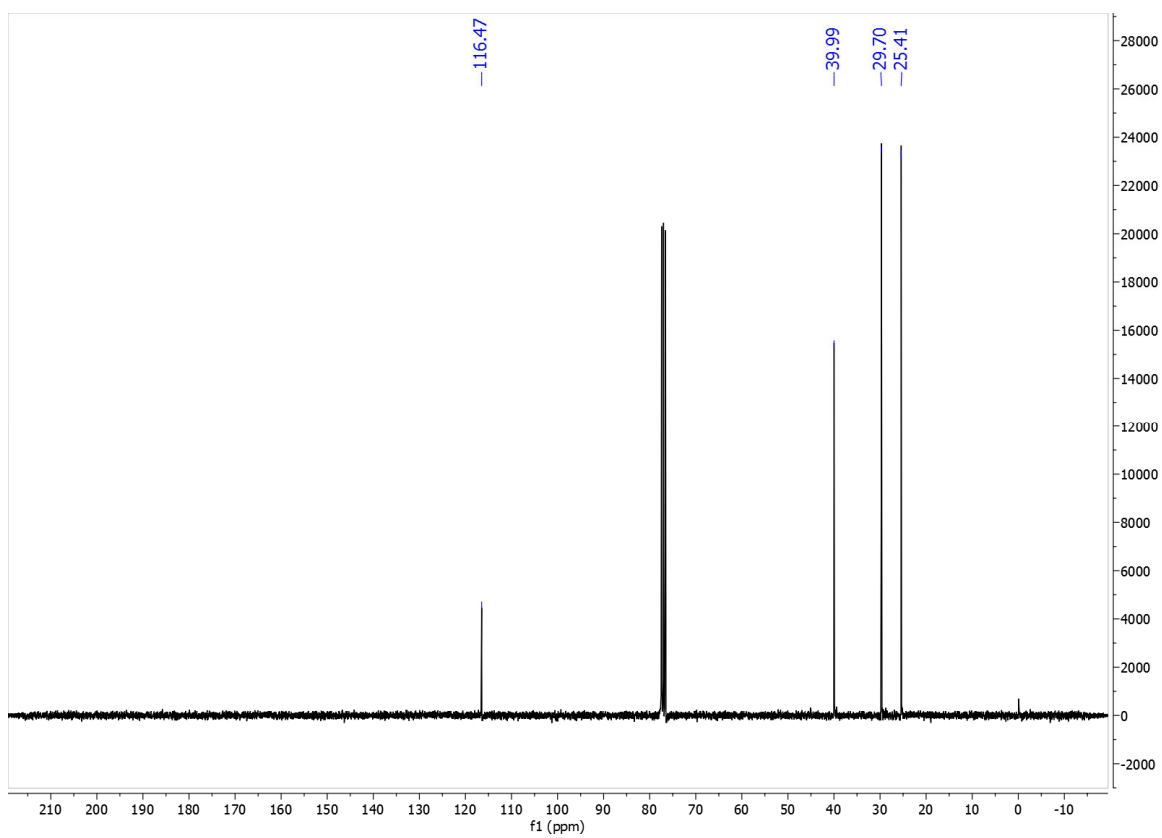

### 3-Bromo-3-phenylpropanenitrile (7b)

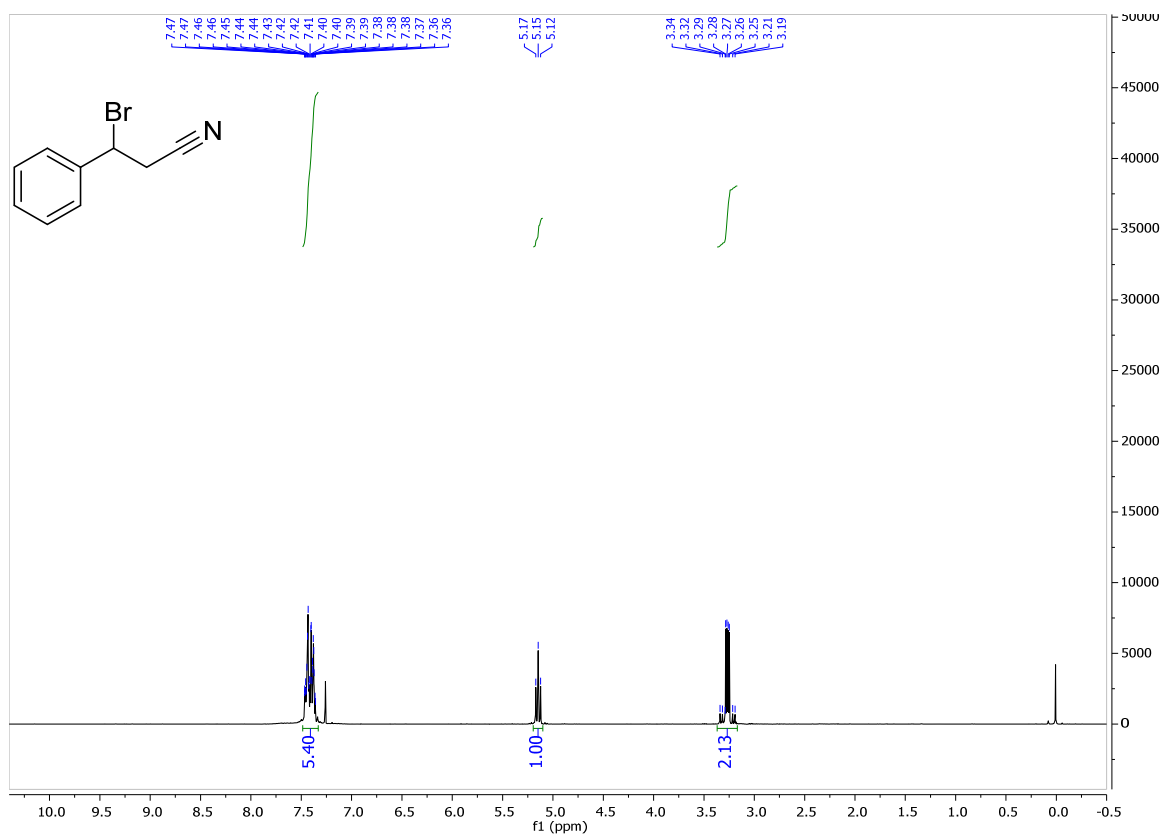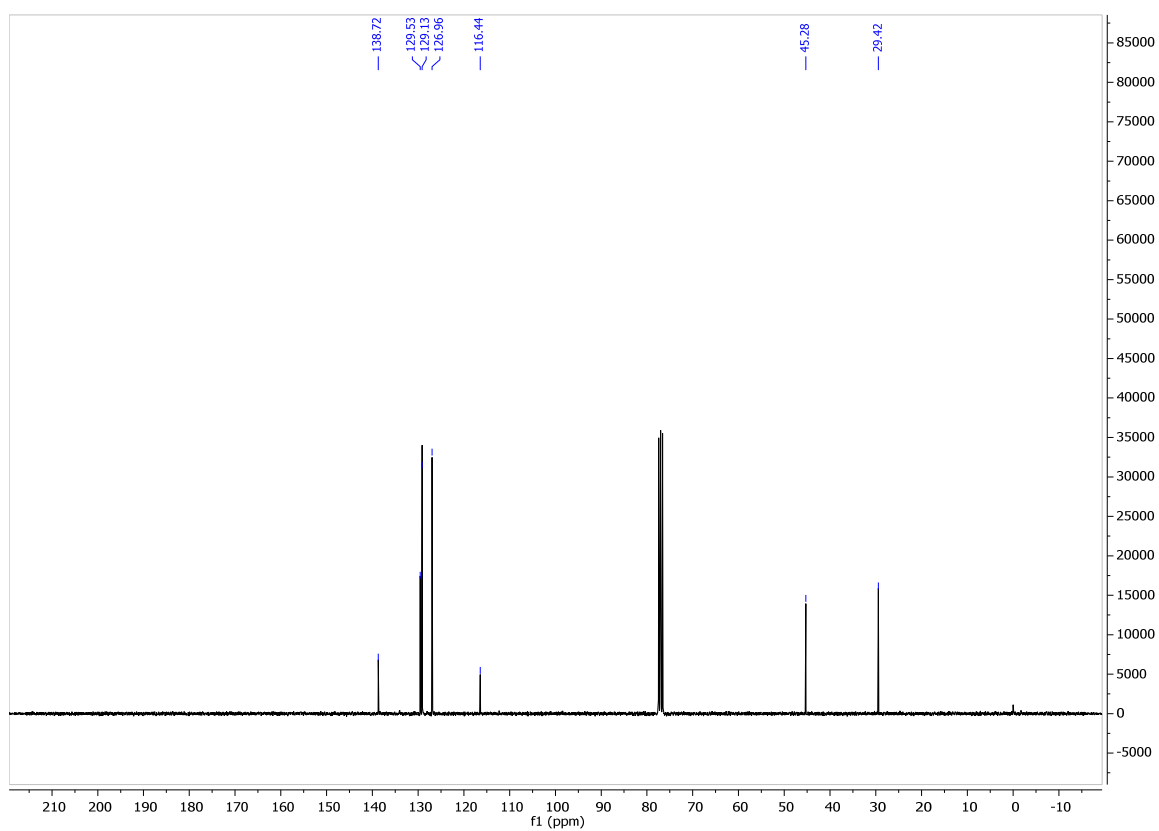

### 3-Bromobutanoic acid (7c)

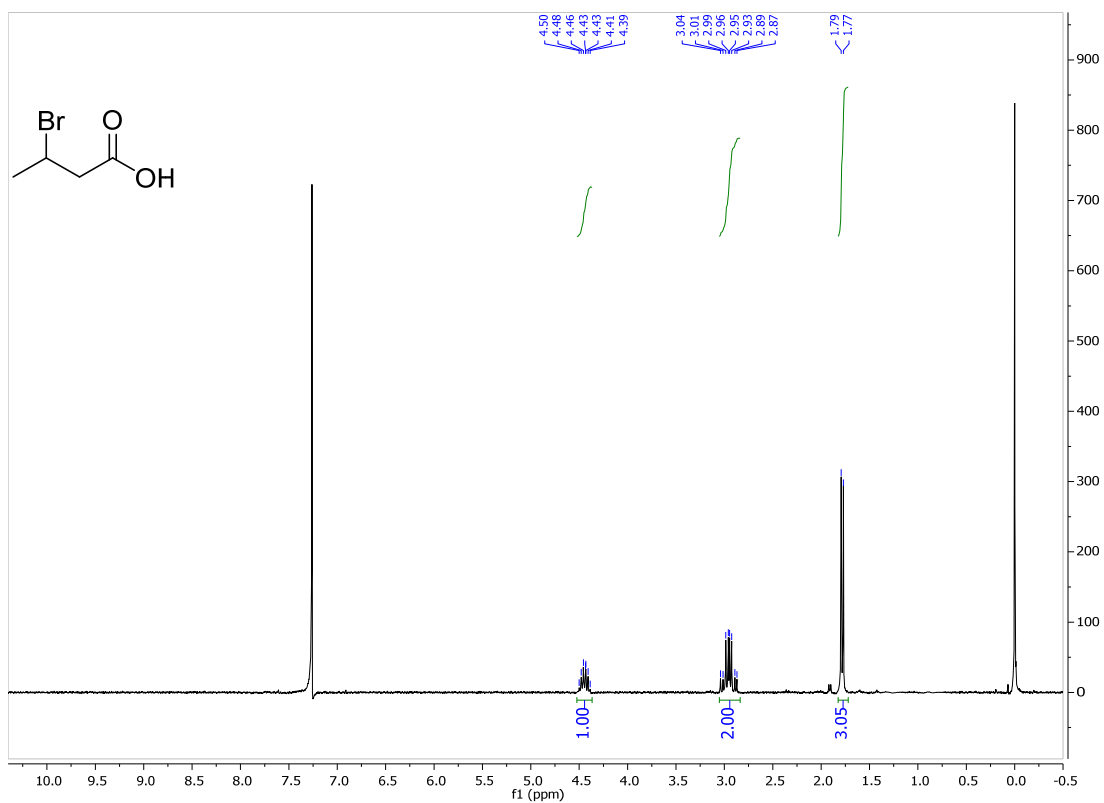

### 3-Bromo-1,5-diphenylpentan-1-one (7d)

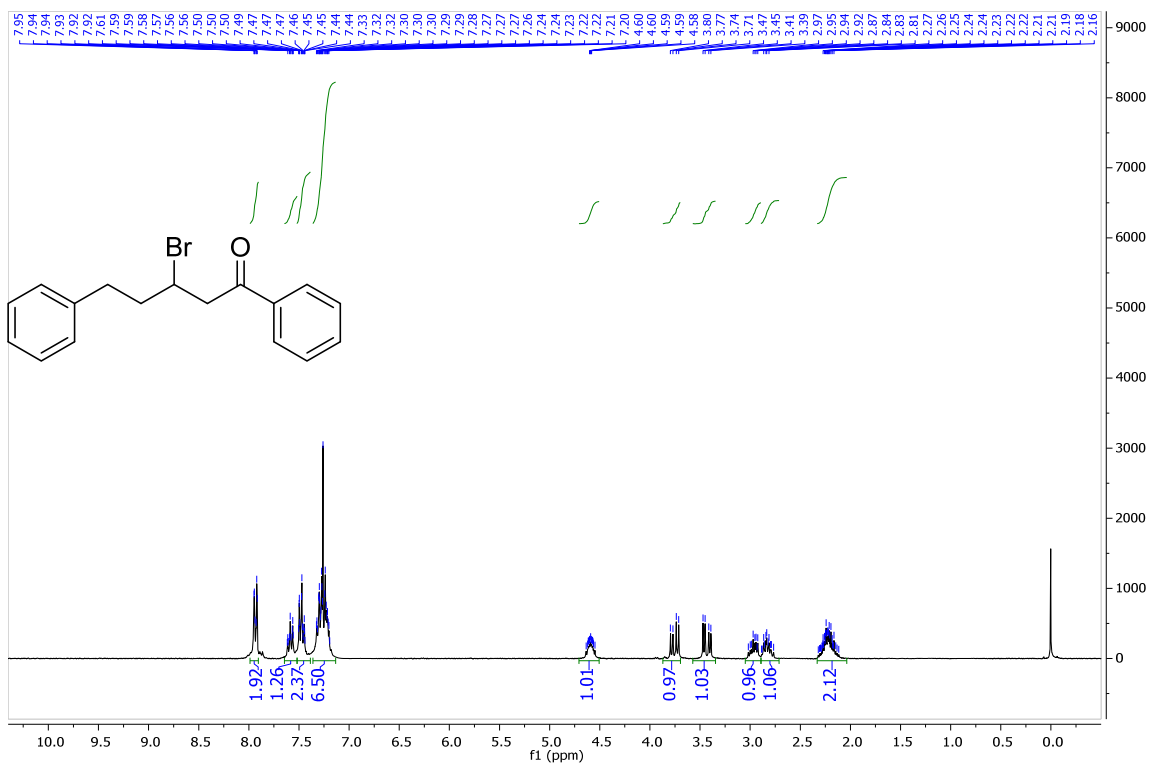

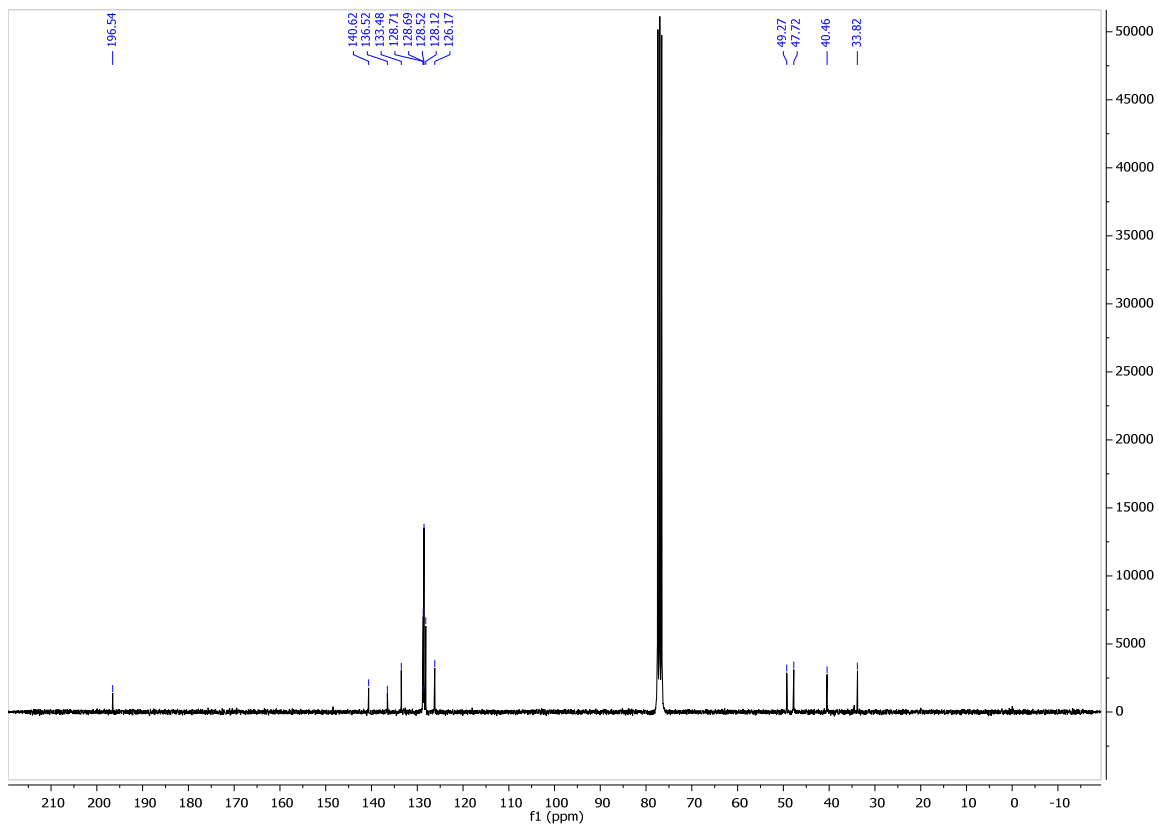

#### 4-Bromotetrahydro-2H-pyran-2-one (7e)

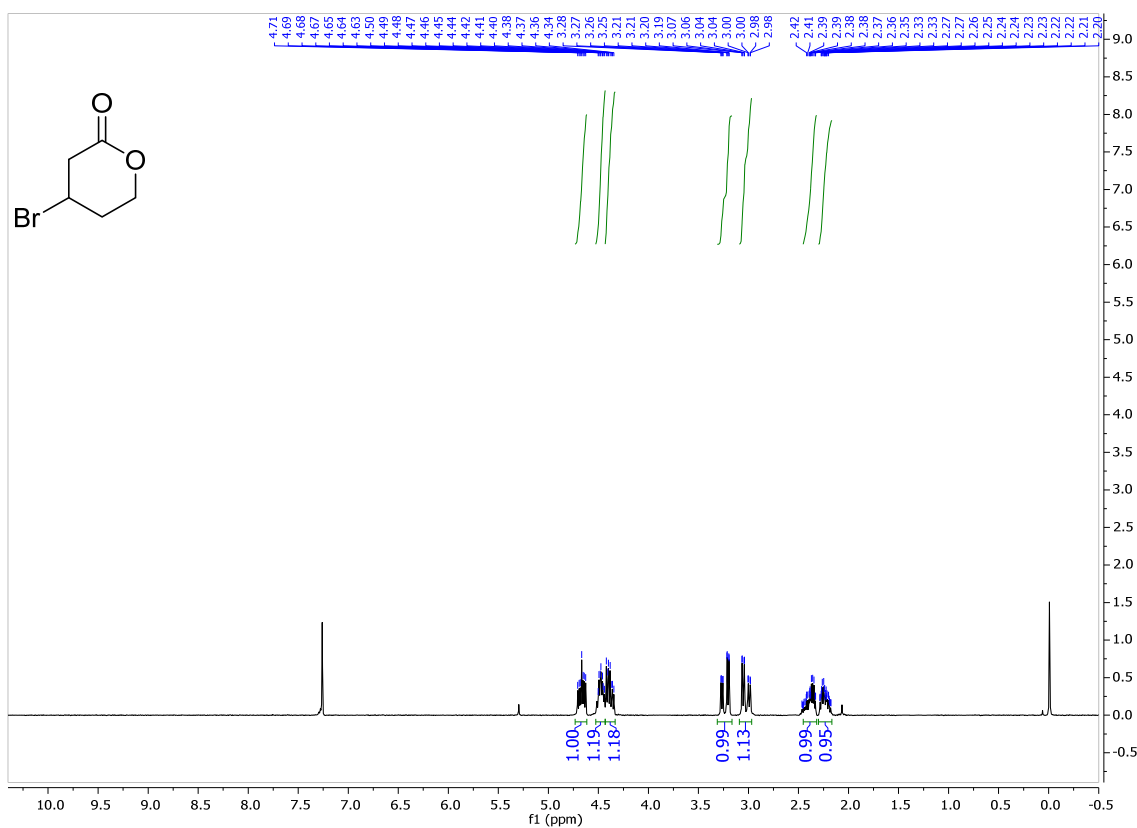

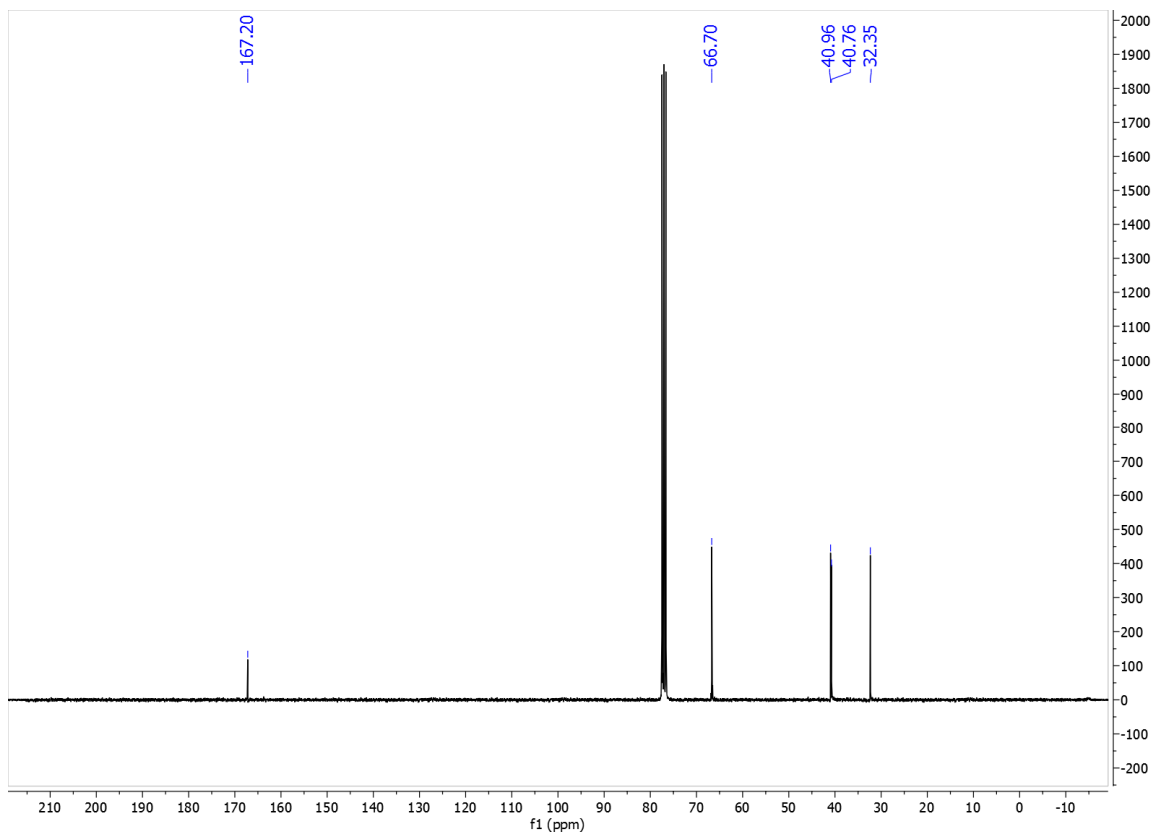

#### 4-Bromodihydrofuran-2(3H)-one (7f)

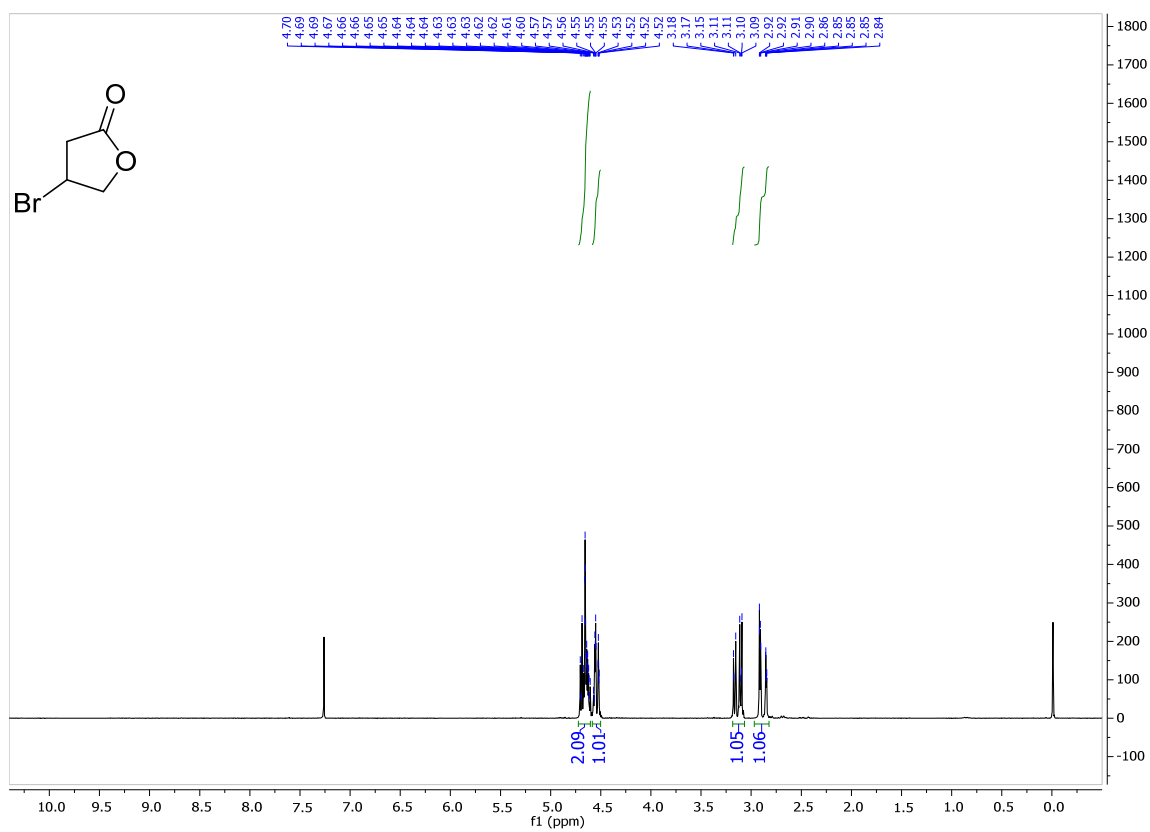



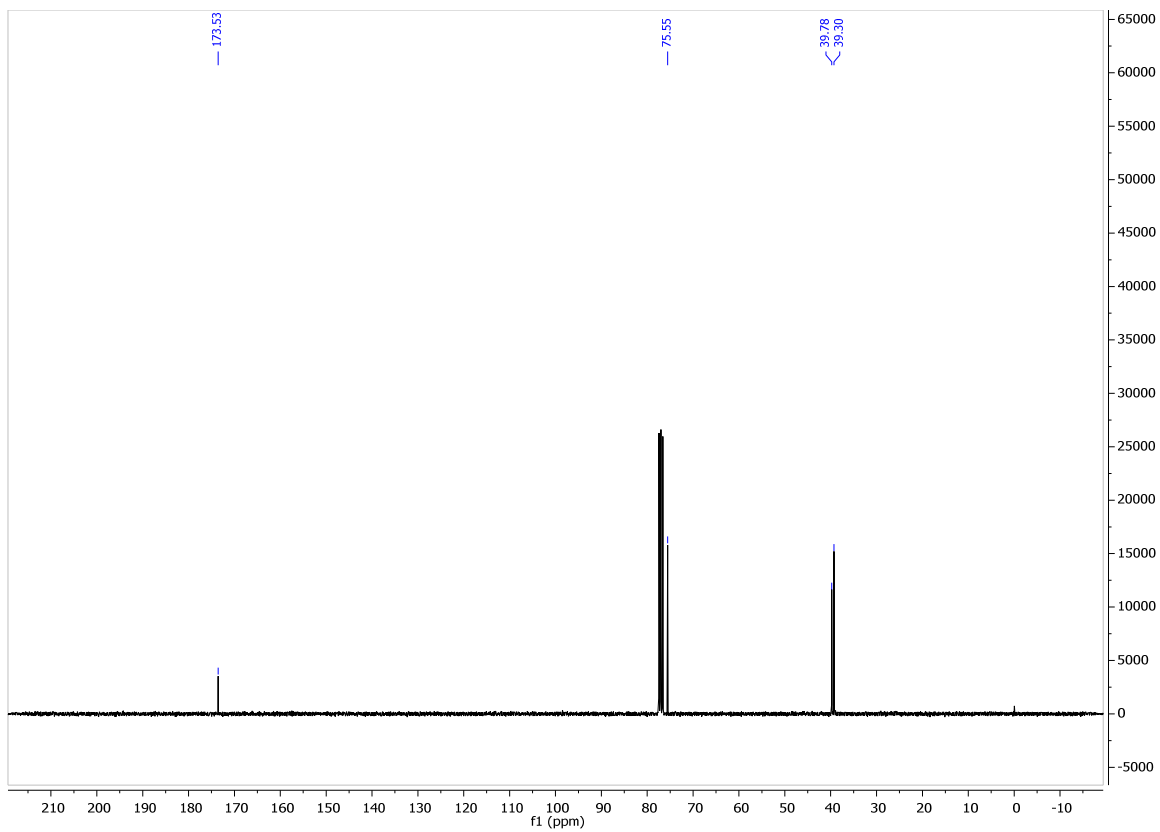

**3-Bromo-1-(piperidin-1-yl)butan-1-one (7g)**

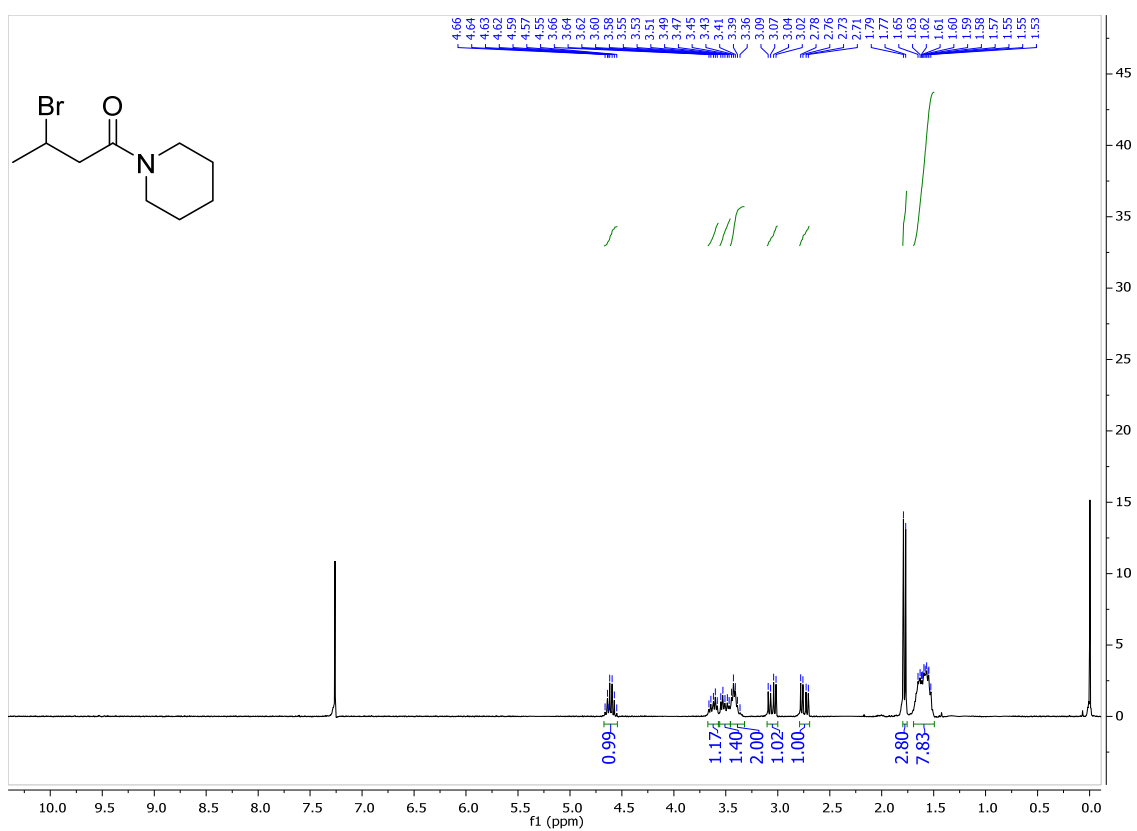

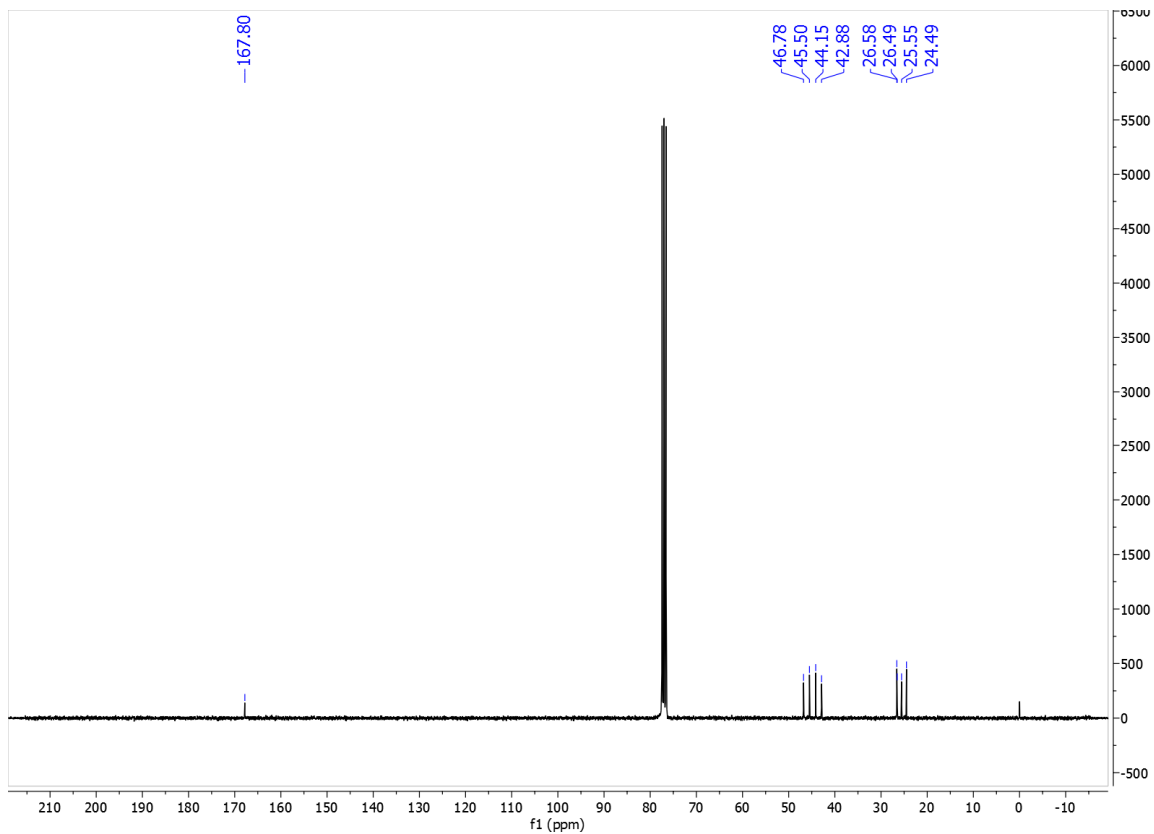

#### 4-Bromo-1-ethylpiperidin-2-one (7h)

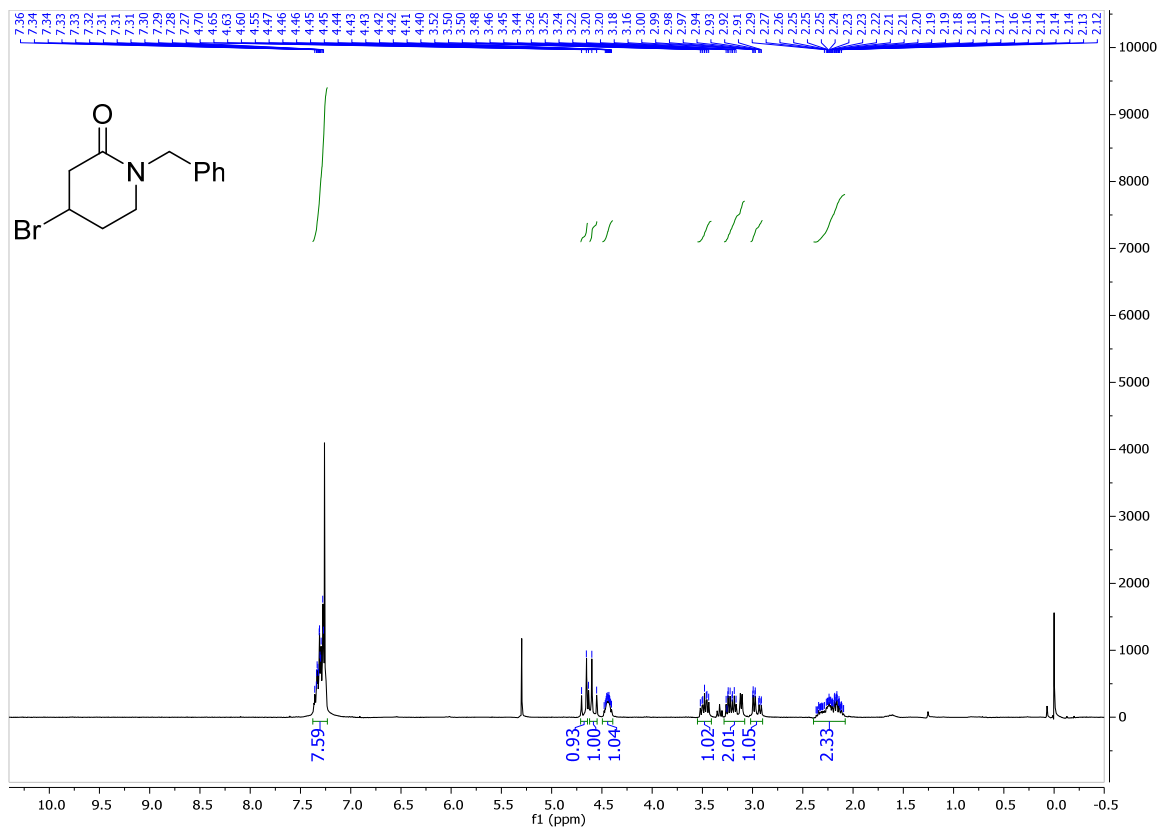

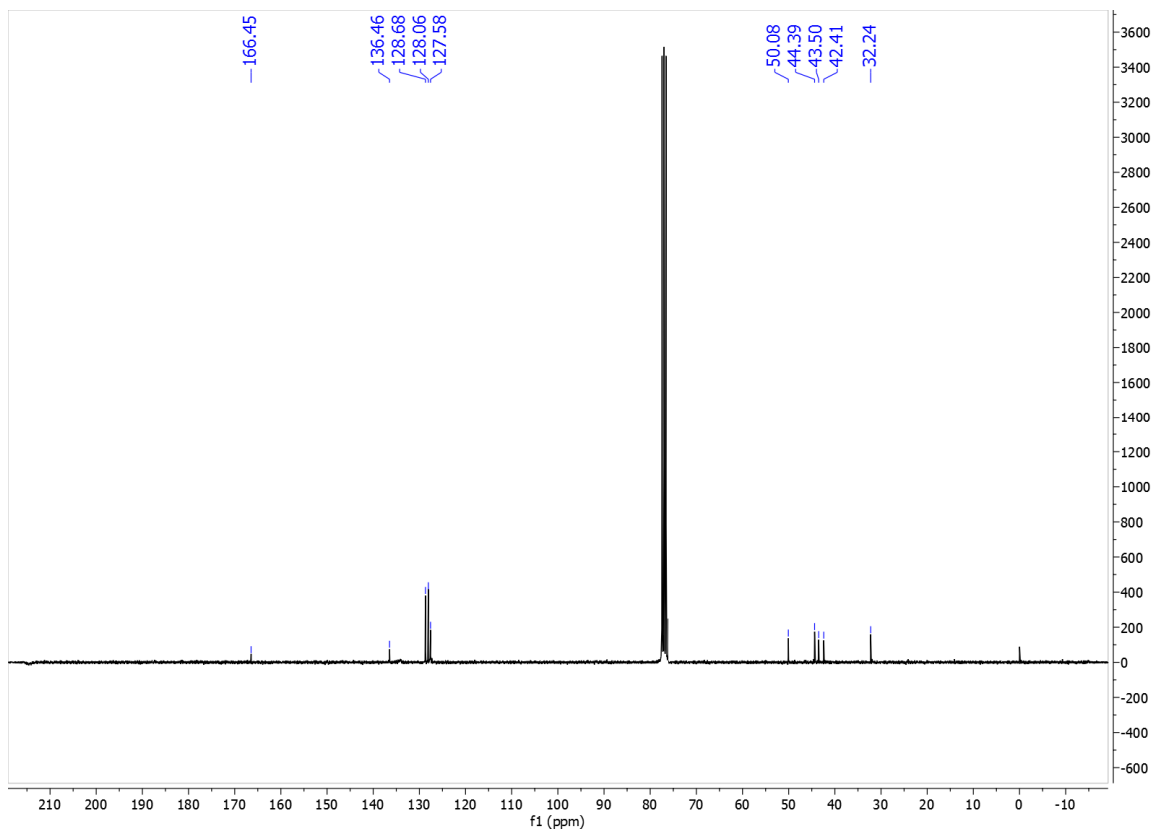

### 3,4-Dibromo-4-phenylbutan-2-one (8a)

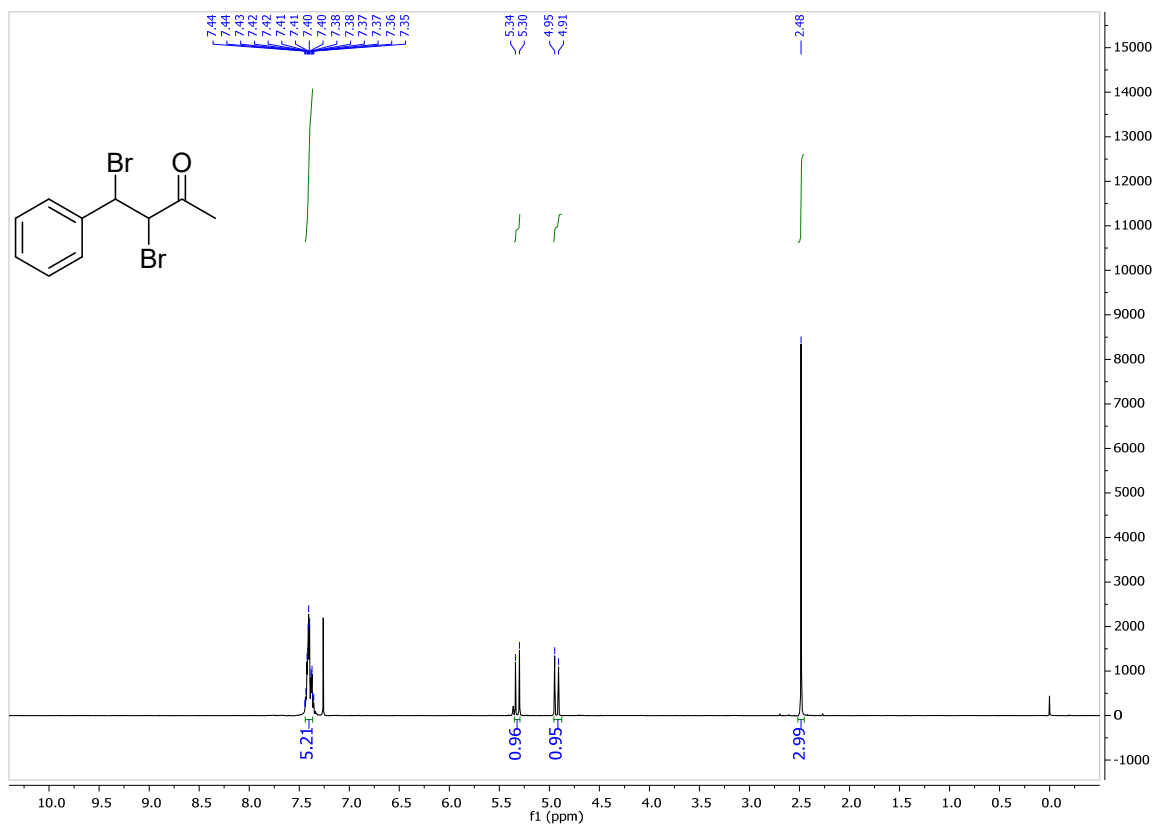

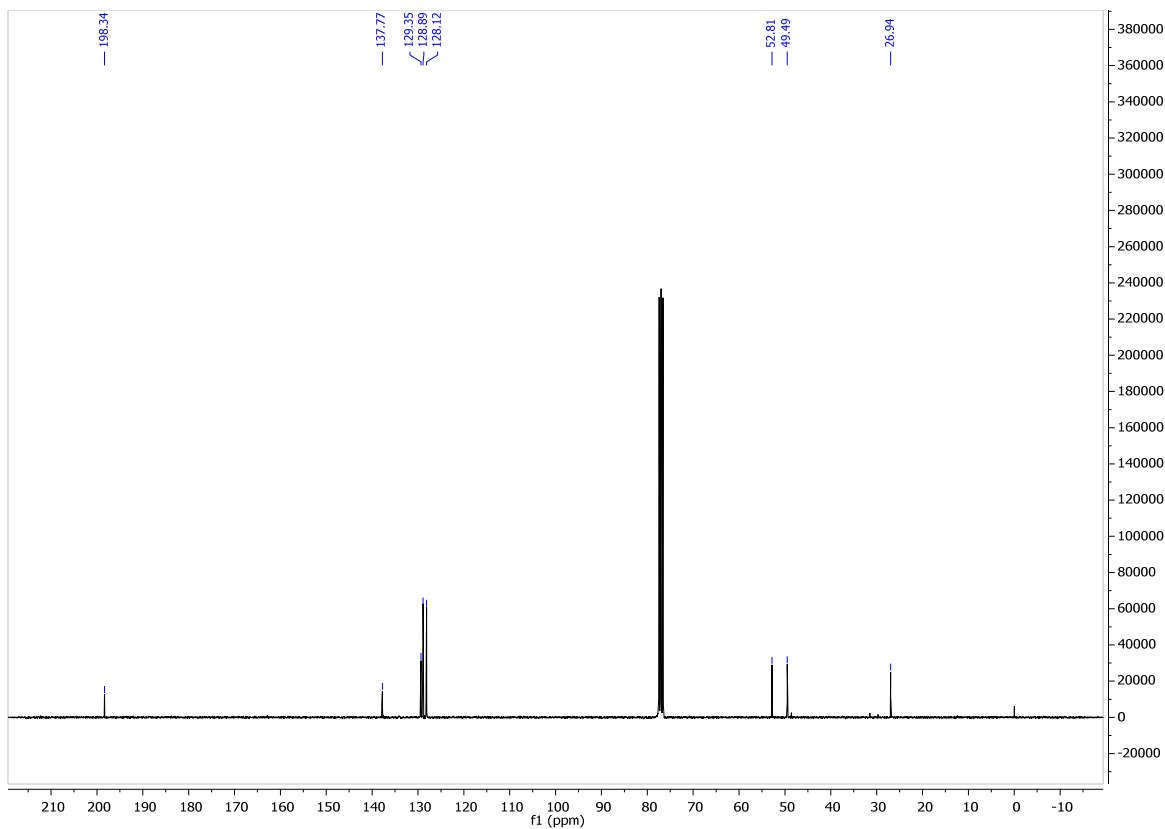

**1,2-Dibromo-1-nitrohexane (8b)**

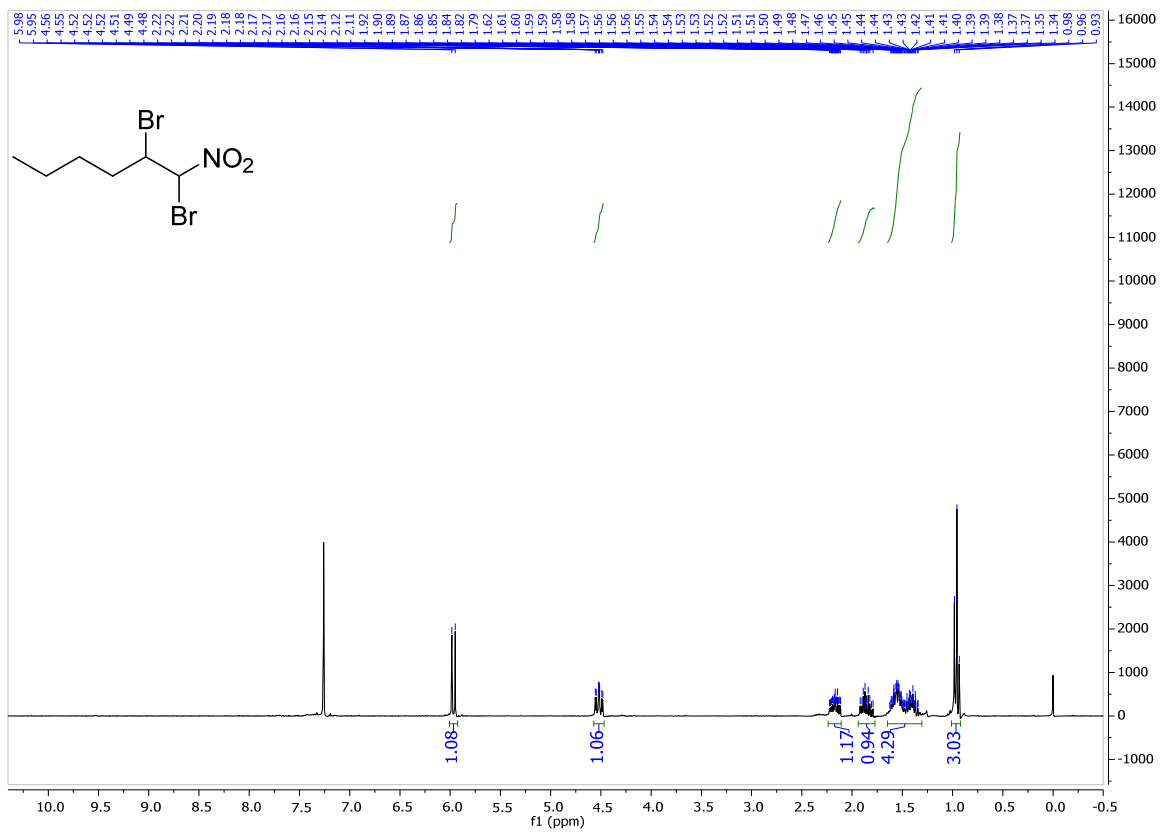

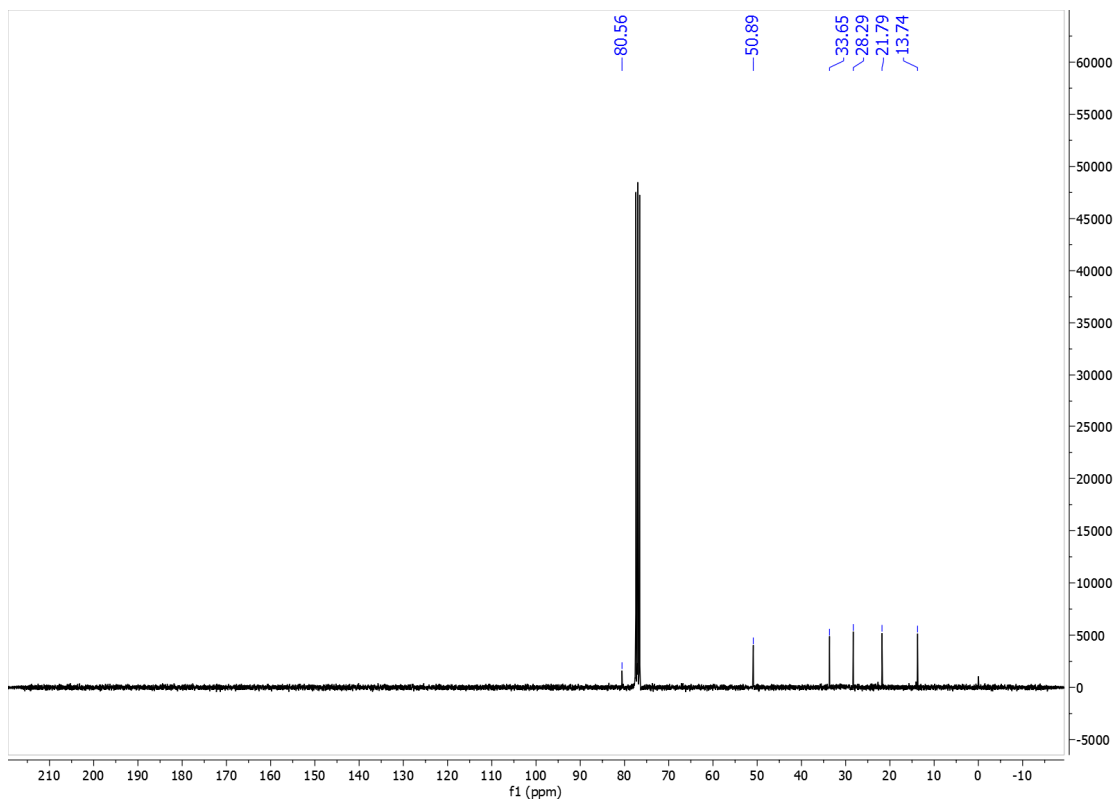

### 2,3-Dibromotetrahydrothiophene SI2

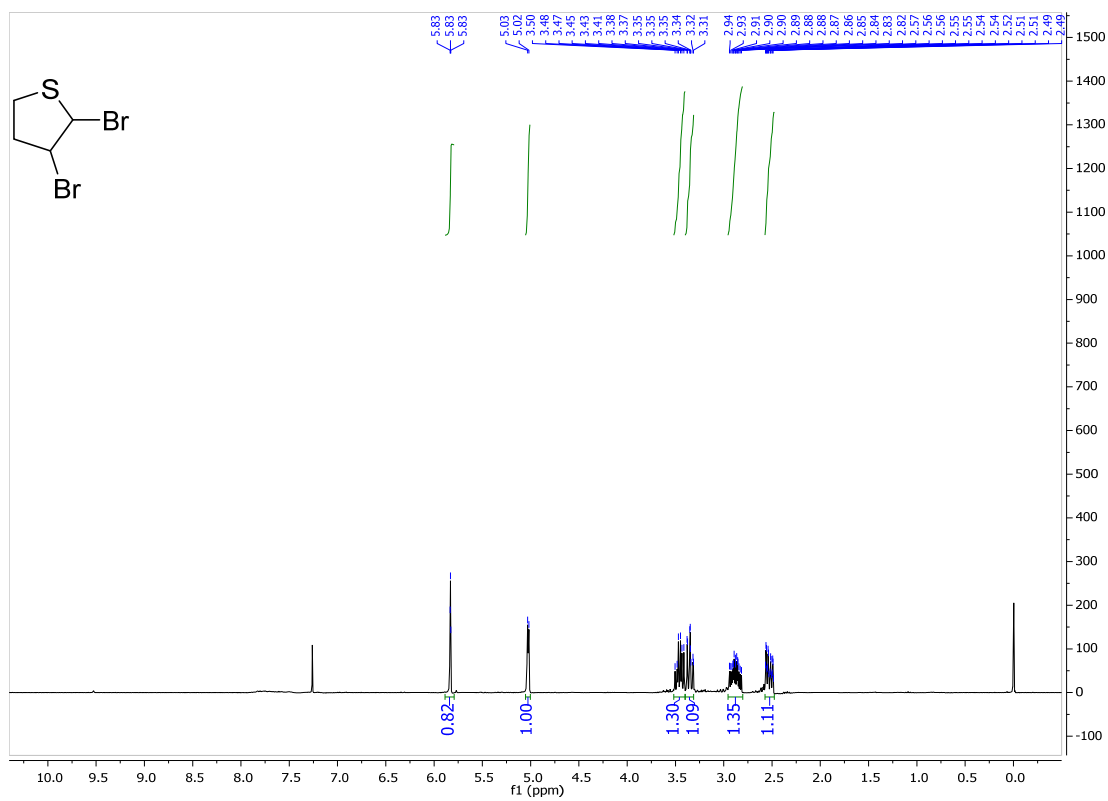

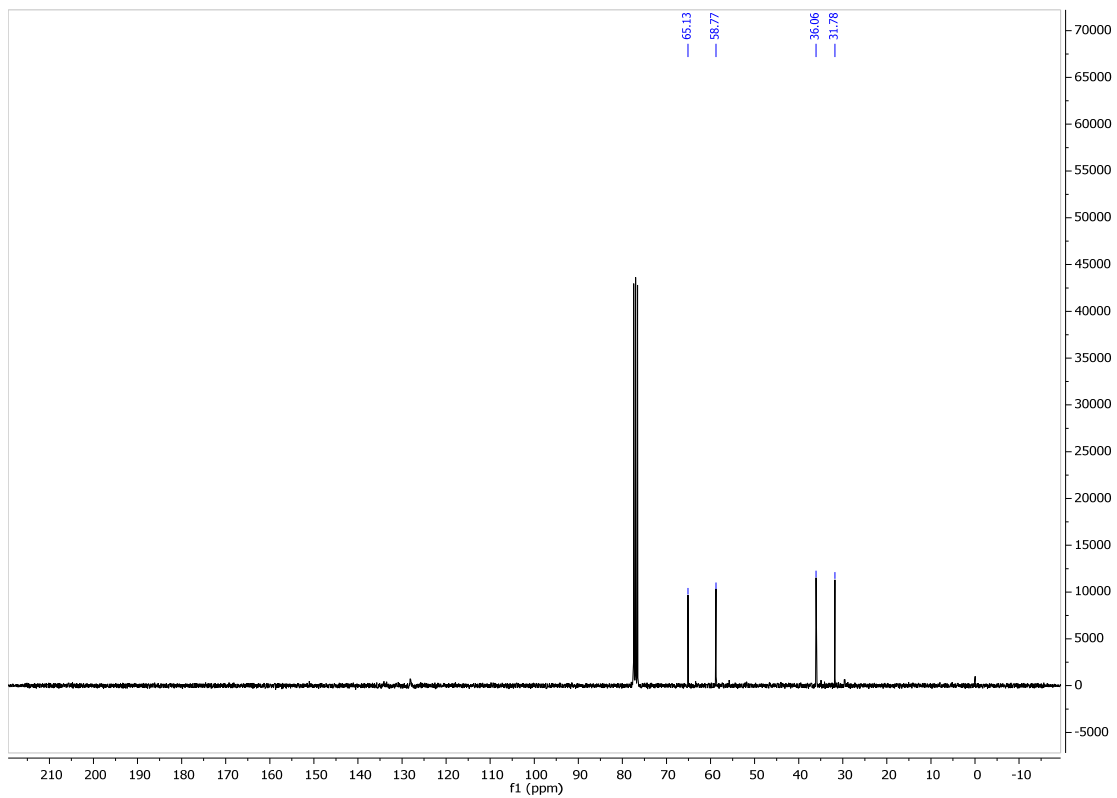

**(R)-3-Bromo-3-phenylpropan-1-ol (9a)**

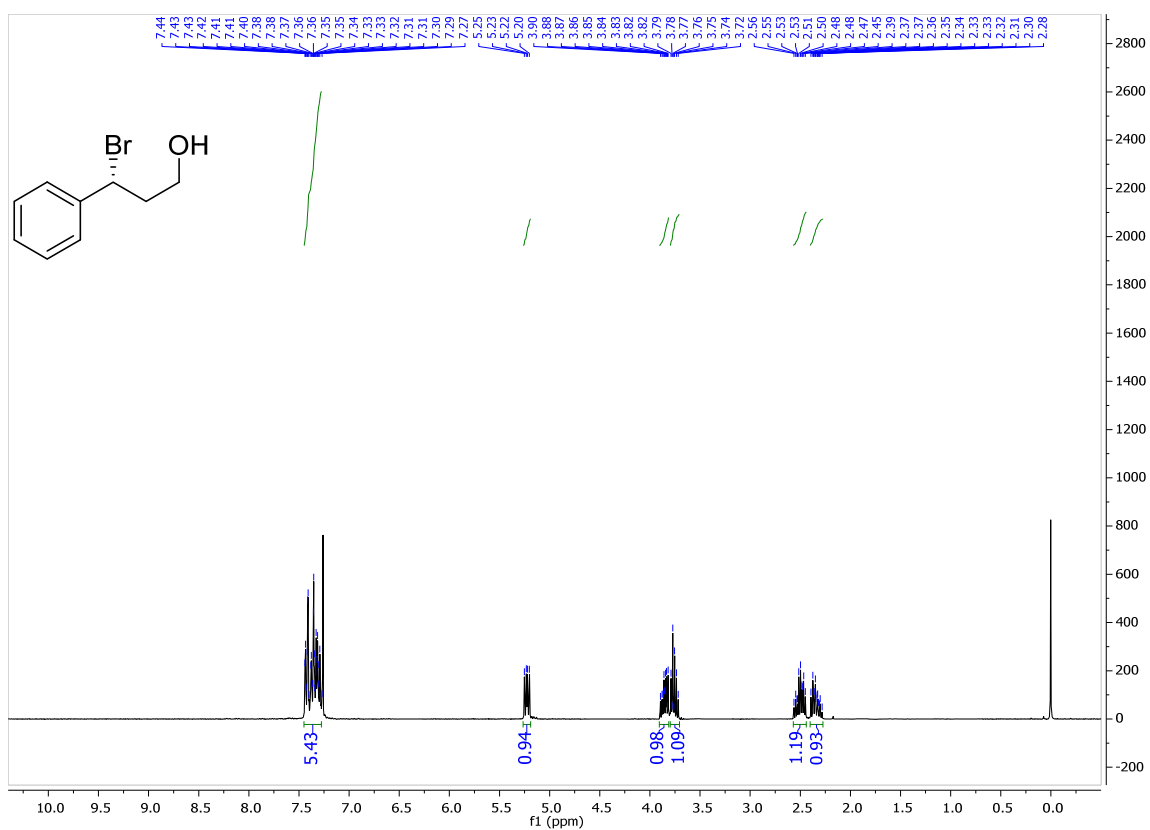

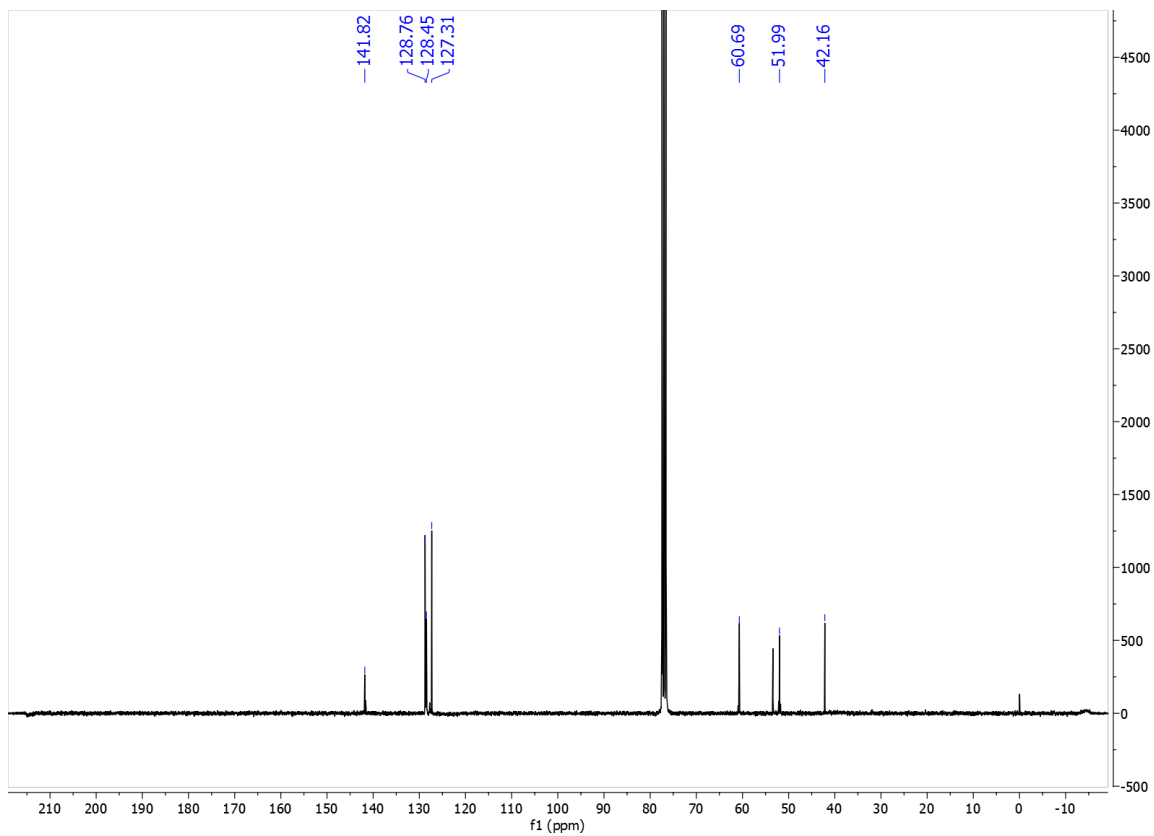

**(R)-3-Bromo-3-(4-chlorophenyl)propan-1-ol (9b)**

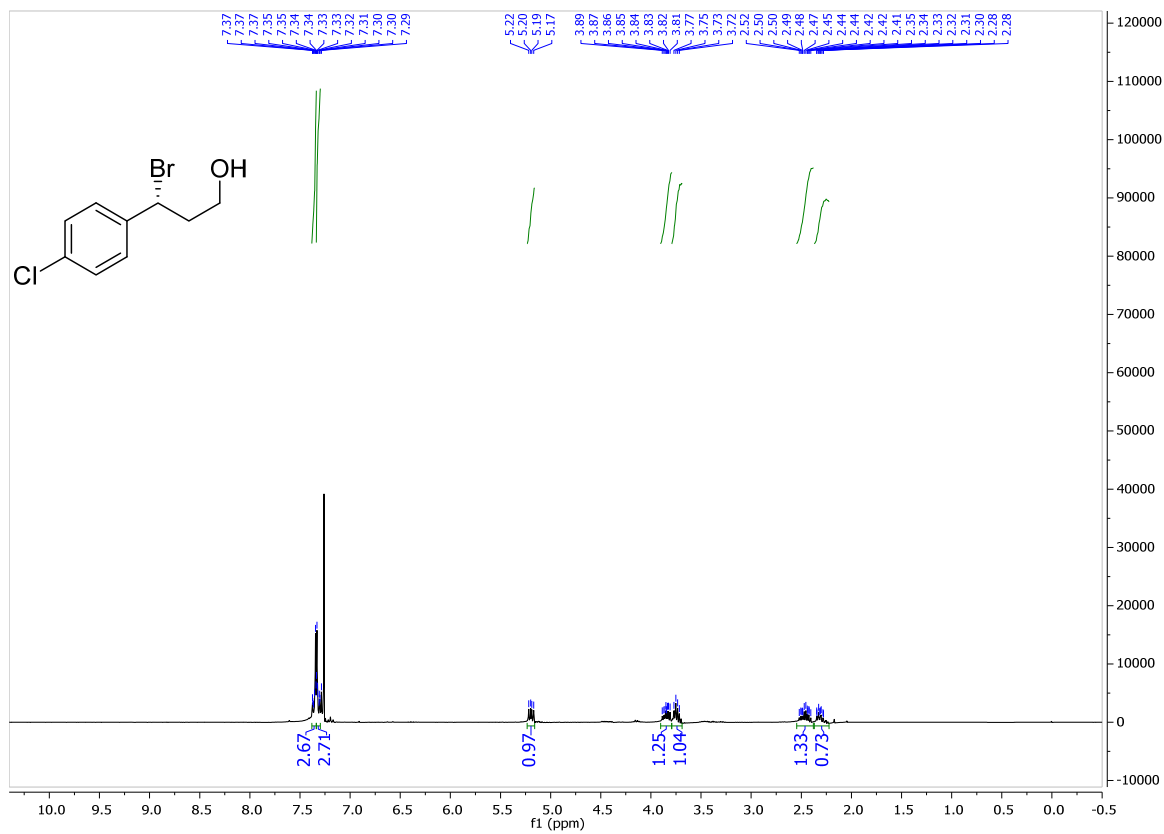

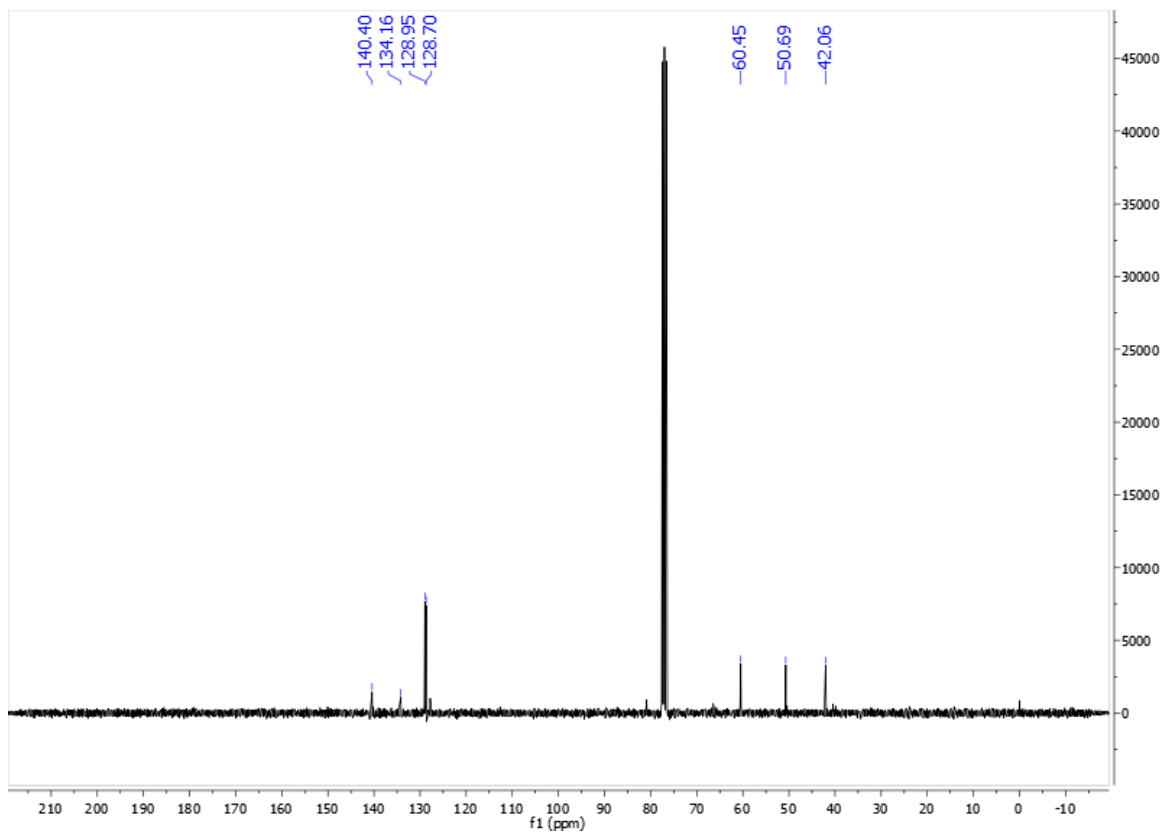

(S)-3-Chlorobutanoic acid (10a)

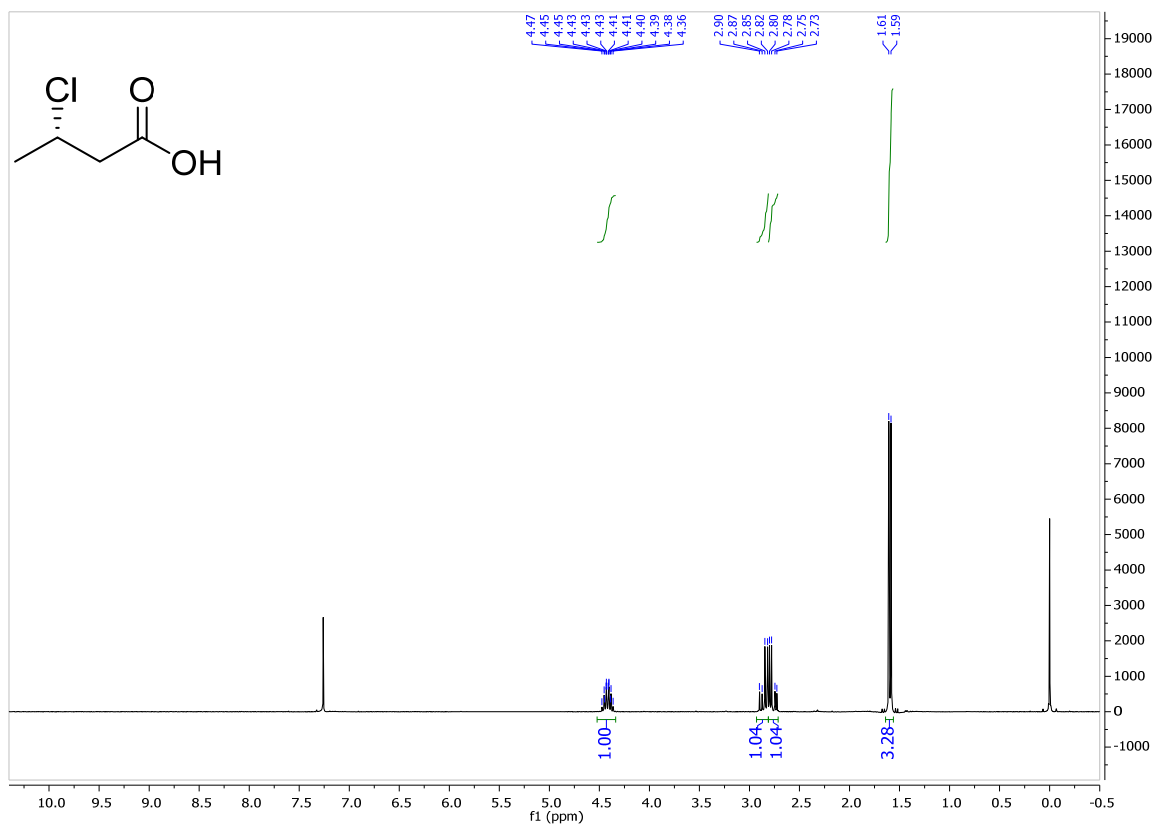



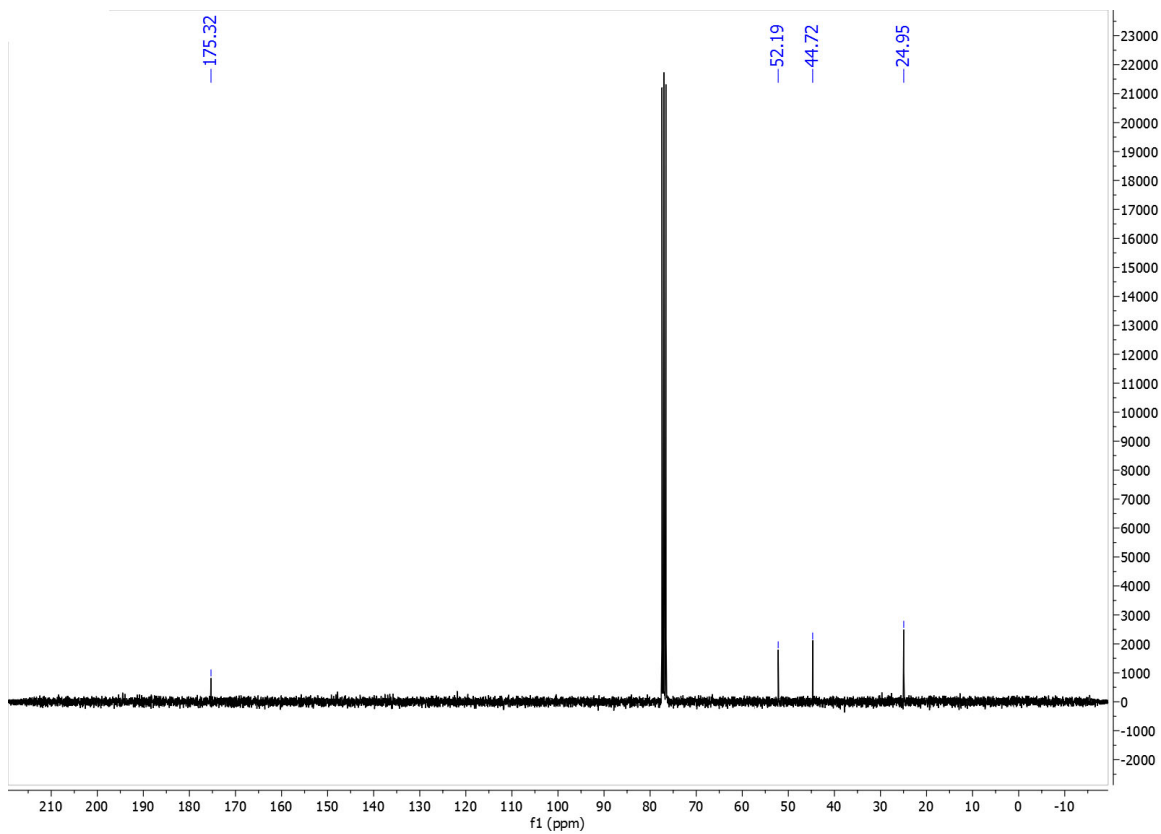

**(S)-3-Chlorooctanoic acid (10b)**

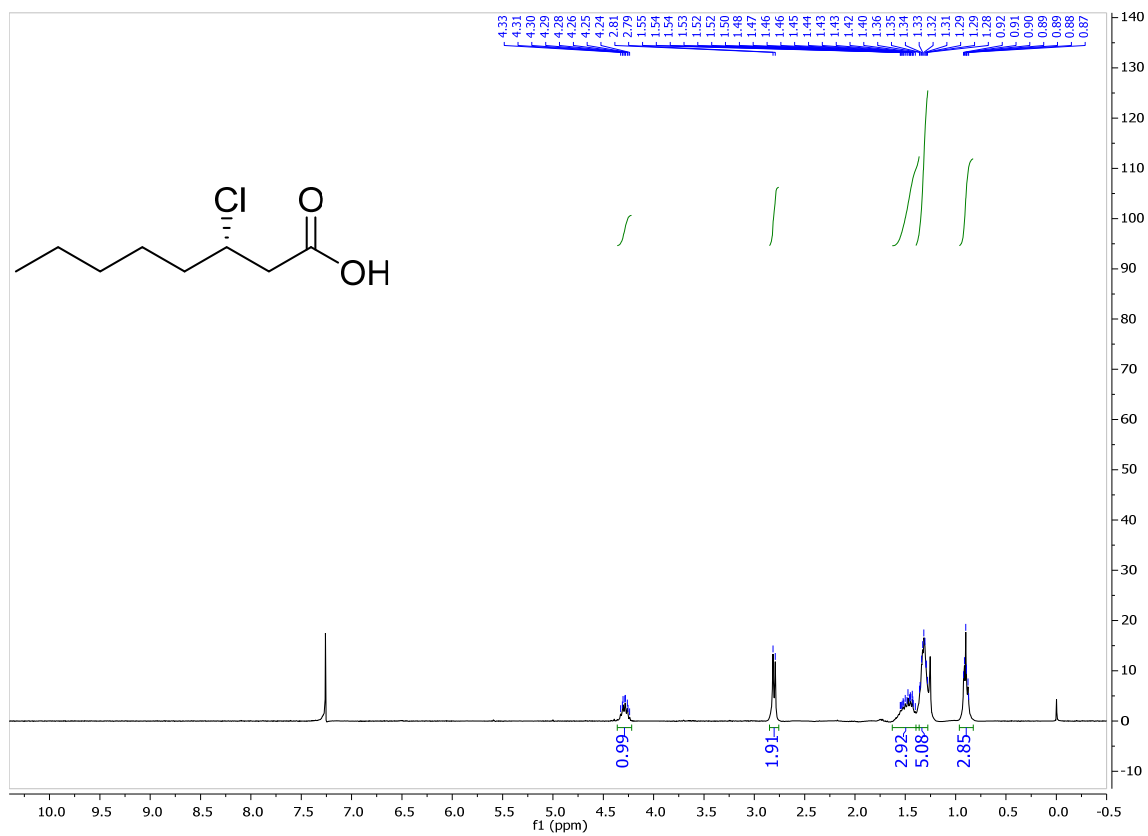

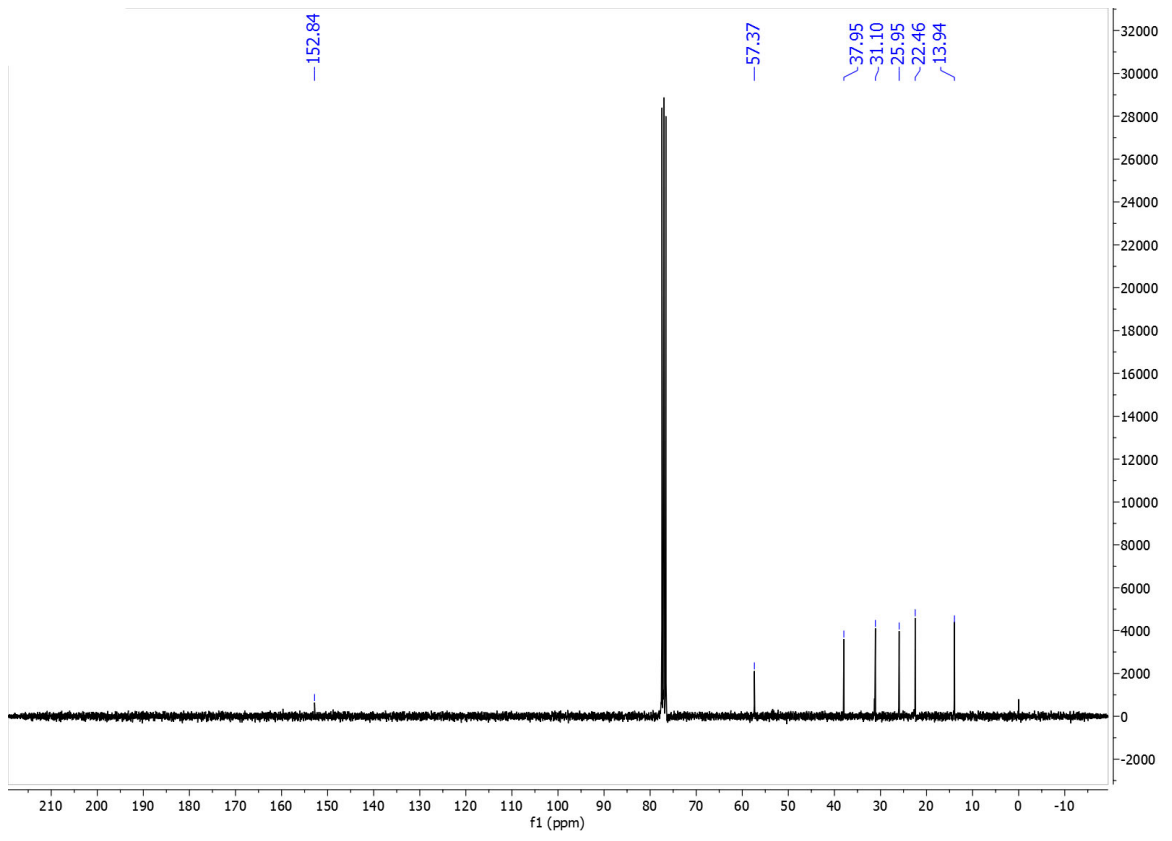

## 8. Single Crystal X-Ray Structure of compound 4e.

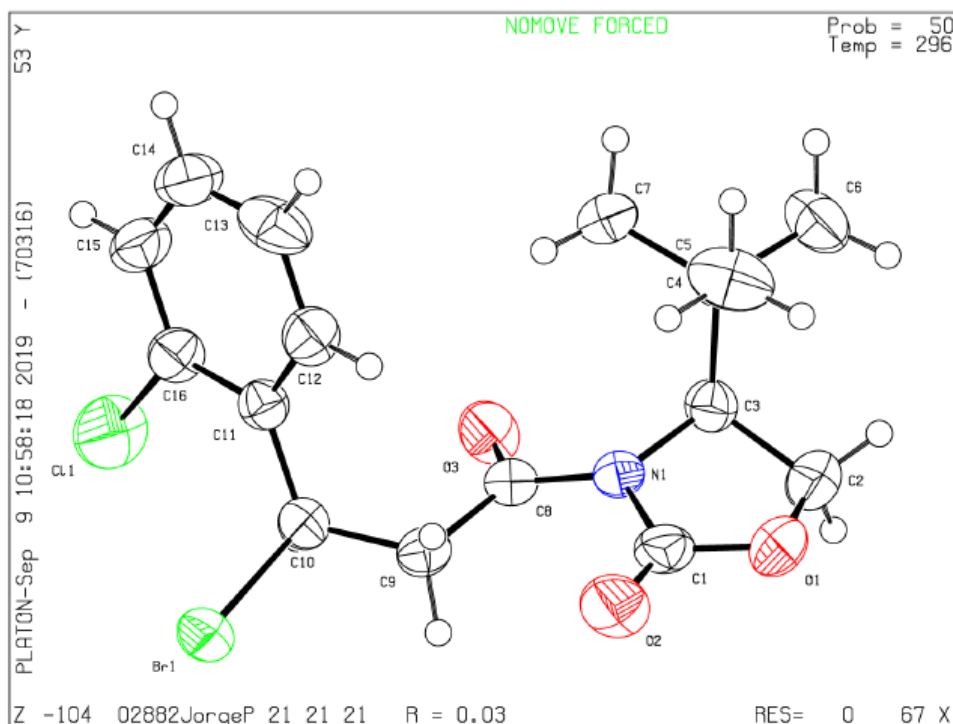

A clear colourless prismatic-like specimen of  $C_{16}H_{19}BrClNO_3$ , approximate dimensions 0.219 mm x 0.355 mm x 0.429 mm, was used for the X-ray crystallographic analysis. The X-ray intensity data were measured.

The total exposure time was 1.67 hours. The frames were integrated with the Bruker SAINT software package using a narrow-frame algorithm. The integration of the data using an orthorhombic unit cell yielded a total of 56068 reflections to a maximum  $\theta$  angle of  $25.34^\circ$  ( $0.83 \text{ \AA}$  resolution), of which 3131 were independent (average redundancy 17.907, completeness = 100.0%,  $R_{\text{int}} = 3.75\%$ ,  $R_{\text{sig}} = 1.52\%$ ) and 2946 (94.09%) were greater than  $2\sigma(F^2)$ . The final cell constants of  $a = 7.0480(2) \text{ \AA}$ ,  $b = 12.9076(3) \text{ \AA}$ ,  $c = 18.7303(5) \text{ \AA}$ , volume =  $1703.95(8) \text{ \AA}^3$ , are based upon the refinement of the XYZ-centroids of 9803 reflections above  $20 \sigma(I)$  with  $5.374^\circ < 2\theta < 46.00^\circ$ . Data were corrected for absorption effects using the multi-scan method (SADABS). The ratio of minimum to maximum apparent transmission was 0.734. The calculated minimum and maximum transmission coefficients (based on crystal size) are 0.4040 and 0.6020.

The final anisotropic full-matrix least-squares refinement on  $F^2$  with 202 variables converged at  $R1 = 2.84\%$ , for the observed data and  $wR2 = 8.58\%$  for all data. The goodness-of-fit was 1.192.

The largest peak in the final difference electron density synthesis was  $0.457 \text{ e}^-/\text{\AA}^3$  and the largest hole was  $-0.220 \text{ e}^-/\text{\AA}^3$  with an RMS deviation of  $0.063 \text{ e}^-/\text{\AA}^3$ . On the basis of the final model, the calculated density was  $1.515 \text{ g/cm}^3$  and  $F(000)$ , 792  $\text{e}^-$ .

**Table 1. Sample and crystal data.**

|                               |                                             |                     |
|-------------------------------|---------------------------------------------|---------------------|
| <b>Identification code</b>    | 02882JorgeHumbrias                          |                     |
| <b>Chemical formula</b>       | $\text{C}_{16}\text{H}_{19}\text{BrClNO}_3$ |                     |
| <b>Formula weight</b>         | 388.68 g/mol                                |                     |
| <b>Temperature</b>            | 296(2) K                                    |                     |
| <b>Wavelength</b>             | 0.71073 $\text{\AA}$                        |                     |
| <b>Crystal size</b>           | 0.219 x 0.355 x 0.429 mm                    |                     |
| <b>Crystal habit</b>          | clear colourless prismatic                  |                     |
| <b>Crystal system</b>         | orthorhombic                                |                     |
| <b>Space group</b>            | P 21 21 21                                  |                     |
| <b>Unit cell dimensions</b>   | $a = 7.0480(2) \text{ \AA}$                 | $\alpha = 90^\circ$ |
|                               | $b = 12.9076(3) \text{ \AA}$                | $\beta = 90^\circ$  |
|                               | $c = 18.7303(5) \text{ \AA}$                | $\gamma = 90^\circ$ |
| <b>Volume</b>                 | 1703.95(8) $\text{\AA}^3$                   |                     |
| <b>Z</b>                      | 4                                           |                     |
| <b>Density (calculated)</b>   | 1.515 $\text{g/cm}^3$                       |                     |
| <b>Absorption coefficient</b> | 2.580 $\text{mm}^{-1}$                      |                     |
| <b>F(000)</b>                 | 792                                         |                     |

**Table 2. Data collection and structure refinement.**

|                                                |                                                            |
|------------------------------------------------|------------------------------------------------------------|
| <b>Theta range for data collection</b>         | 1.92 to 25.34°                                             |
| <b>Index ranges</b>                            | $-8 \leq h \leq 8, -15 \leq k \leq 15, -22 \leq l \leq 22$ |
| <b>Reflections collected</b>                   | 56068                                                      |
| <b>Independent reflections</b>                 | 3131 [R(int) = 0.0375]                                     |
| <b>Coverage of independent reflections</b>     | 100.0%                                                     |
| <b>Absorption correction</b>                   | multi-scan                                                 |
| <b>Max. and min. transmission</b>              | 0.6020 and 0.4040                                          |
| <b>Refinement method</b>                       | Full-matrix least-squares on $F^2$                         |
| <b>Refinement program</b>                      | SHELXL-2014/7 (Sheldrick, 2014)                            |
| <b>Function minimized</b>                      | $\sum w(F_o^2 - F_c^2)^2$                                  |
| <b>Data / restraints / parameters</b>          | 3131 / 0 / 202                                             |
| <b>Goodness-of-fit on <math>F^2</math></b>     | 1.192                                                      |
| <b><math>\Delta/\sigma_{\text{max}}</math></b> | 0.001                                                      |

|                                     |                                                                           |                              |
|-------------------------------------|---------------------------------------------------------------------------|------------------------------|
| <b>Final R indices</b>              | 2946 data;<br>I > 2σ(I)                                                   | R1 = 0.0284, wR2 =<br>0.0740 |
|                                     | all data                                                                  | R1 = 0.0320, wR2 =<br>0.0858 |
| <b>Weighting scheme</b>             | $w=1/[\sigma^2(F_o^2)+(0.0458P)^2+0.5981P]$<br>where $P=(F_o^2+2F_c^2)/3$ |                              |
| <b>Absolute structure parameter</b> | 0.0(0)                                                                    |                              |
| <b>Largest diff. peak and hole</b>  | 0.457 and -0.220 eÅ <sup>-3</sup>                                         |                              |
| <b>R.M.S. deviation from mean</b>   | 0.063 eÅ <sup>-3</sup>                                                    |                              |

**Table 3. Atomic coordinates and equivalent isotropic atomic displacement parameters (Å<sup>2</sup>).**

U(eq) is defined as one third of the trace of the U<sub>ij</sub> tensor.

|     | x/a        | y/b         | z/c         | U(eq)       |
|-----|------------|-------------|-------------|-------------|
| Br1 | 0.45685(8) | 0.44691(4)  | 0.70546(2)  | 0.05026(17) |
| C1  | 0.4494(9)  | 0.2521(3)   | 0.4466(3)   | 0.0477(11)  |
| C2  | 0.3411(10) | 0.2662(4)   | 0.3328(3)   | 0.0665(17)  |
| C3  | 0.3983(7)  | 0.3749(4)   | 0.3555(2)   | 0.0407(10)  |
| C4  | 0.5785(6)  | 0.4166(3)   | 0.3186(2)   | 0.0373(10)  |
| C5  | 0.7478(9)  | 0.3477(5)   | 0.3294(4)   | 0.0701(17)  |
| C6  | 0.5369(9)  | 0.4285(5)   | 0.2391(3)   | 0.0616(14)  |
| C7  | 0.6249(10) | 0.5244(4)   | 0.3482(3)   | 0.0676(17)  |
| C8  | 0.3786(7)  | 0.4325(3)   | 0.4829(2)   | 0.0393(10)  |
| C9  | 0.4202(8)  | 0.4053(3)   | 0.5600(2)   | 0.0457(12)  |
| C10 | 0.4278(7)  | 0.5007(4)   | 0.6061(2)   | 0.0415(11)  |
| C11 | 0.5854(6)  | 0.5751(3)   | 0.5908(2)   | 0.0369(10)  |
| C12 | 0.7525(8)  | 0.5463(4)   | 0.5566(3)   | 0.0489(11)  |
| C13 | 0.8943(8)  | 0.6169(5)   | 0.5411(3)   | 0.0611(15)  |
| C14 | 0.8693(9)  | 0.7198(5)   | 0.5596(3)   | 0.0600(14)  |
| C15 | 0.7083(9)  | 0.7496(4)   | 0.5934(3)   | 0.0544(14)  |
| C16 | 0.5705(7)  | 0.6788(3)   | 0.6092(2)   | 0.0434(11)  |
| Cl1 | 0.3676(3)  | 0.72412(11) | 0.65196(10) | 0.0750(5)   |
| N1  | 0.4227(5)  | 0.3583(3)   | 0.43263(18) | 0.0356(8)   |
| O1  | 0.4141(7)  | 0.1992(3)   | 0.3868(2)   | 0.0692(12)  |
| O2  | 0.4970(7)  | 0.2116(3)   | 0.5007(2)   | 0.0640(12)  |
| O3  | 0.3163(6)  | 0.5149(3)   | 0.46474(18) | 0.0530(9)   |

**Table 4. Bond lengths (Å).**

|         |          |         |          |
|---------|----------|---------|----------|
| Br1-C10 | 1.996(4) | C1-O2   | 1.188(6) |
| C1-O1   | 1.335(6) | C1-N1   | 1.408(6) |
| C2-O1   | 1.426(7) | C2-C3   | 1.521(7) |
| C2-H2A  | 0.97     | C2-H2B  | 0.97     |
| C3-N1   | 1.470(5) | C3-C4   | 1.543(6) |
| C3-H3   | 0.98     | C4-C5   | 1.502(7) |
| C4-C6   | 1.526(7) | C4-C7   | 1.532(7) |
| C5-H5A  | 0.96     | C5-H5B  | 0.96     |
| C5-H5C  | 0.96     | C6-H6A  | 0.96     |
| C6-H6B  | 0.96     | C6-H6C  | 0.96     |
| C7-H7A  | 0.96     | C7-H7B  | 0.96     |
| C7-H7C  | 0.96     | C8-O3   | 1.200(5) |
| C8-N1   | 1.378(6) | C8-C9   | 1.515(6) |
| C9-C10  | 1.505(6) | C9-H9A  | 0.97     |
| C9-H9B  | 0.97     | C10-C11 | 1.496(6) |
| C10-H10 | 0.98     | C11-C16 | 1.387(6) |
| C11-C12 | 1.391(7) | C12-C13 | 1.384(8) |
| C12-H12 | 0.93     | C13-C14 | 1.383(9) |
| C13-H13 | 0.93     | C14-C15 | 1.355(9) |
| C14-H14 | 0.93     | C15-C16 | 1.366(7) |
| C15-H15 | 0.93     | C16-Cl1 | 1.740(5) |

**Table 5. Bond angles (°).**

|            |          |            |          |
|------------|----------|------------|----------|
| O2-C1-O1   | 122.8(4) | O2-C1-N1   | 128.7(5) |
| O1-C1-N1   | 108.5(4) | O1-C2-C3   | 105.3(4) |
| O1-C2-H2A  | 110.7    | C3-C2-H2A  | 110.7    |
| O1-C2-H2B  | 110.7    | C3-C2-H2B  | 110.7    |
| H2A-C2-H2B | 108.8    | N1-C3-C2   | 99.9(4)  |
| N1-C3-C4   | 113.2(4) | C2-C3-C4   | 114.5(4) |
| N1-C3-H3   | 109.6    | C2-C3-H3   | 109.6    |
| C4-C3-H3   | 109.6    | C5-C4-C6   | 110.1(4) |
| C5-C4-C7   | 108.7(5) | C6-C4-C7   | 107.6(4) |
| C5-C4-C3   | 112.7(4) | C6-C4-C3   | 108.3(4) |
| C7-C4-C3   | 109.3(4) | C4-C5-H5A  | 109.5    |
| C4-C5-H5B  | 109.5    | H5A-C5-H5B | 109.5    |
| C4-C5-H5C  | 109.5    | H5A-C5-H5C | 109.5    |
| H5B-C5-H5C | 109.5    | C4-C6-H6A  | 109.5    |
| C4-C6-H6B  | 109.5    | H6A-C6-H6B | 109.5    |
| C4-C6-H6C  | 109.5    | H6A-C6-H6C | 109.5    |

|             |          |             |          |
|-------------|----------|-------------|----------|
| H6B-C6-H6C  | 109.5    | C4-C7-H7A   | 109.5    |
| C4-C7-H7B   | 109.5    | H7A-C7-H7B  | 109.5    |
| C4-C7-H7C   | 109.5    | H7A-C7-H7C  | 109.5    |
| H7B-C7-H7C  | 109.5    | O3-C8-N1    | 120.4(4) |
| O3-C8-C9    | 123.1(4) | N1-C8-C9    | 116.5(4) |
| C10-C9-C8   | 111.4(4) | C10-C9-H9A  | 109.3    |
| C8-C9-H9A   | 109.3    | C10-C9-H9B  | 109.3    |
| C8-C9-H9B   | 109.3    | H9A-C9-H9B  | 108.0    |
| C11-C10-C9  | 116.2(4) | C11-C10-Br1 | 109.0(3) |
| C9-C10-Br1  | 104.8(3) | C11-C10-H10 | 108.9    |
| C9-C10-H10  | 108.9    | Br1-C10-H10 | 108.9    |
| C16-C11-C12 | 115.8(4) | C16-C11-C10 | 121.1(4) |
| C12-C11-C10 | 123.0(4) | C13-C12-C11 | 122.2(5) |
| C13-C12-H12 | 118.9    | C11-C12-H12 | 118.9    |
| C14-C13-C12 | 119.2(5) | C14-C13-H13 | 120.4    |
| C12-C13-H13 | 120.4    | C15-C14-C13 | 119.8(5) |
| C15-C14-H14 | 120.1    | C13-C14-H14 | 120.1    |
| C14-C15-C16 | 120.4(5) | C14-C15-H15 | 119.8    |
| C16-C15-H15 | 119.8    | C15-C16-C11 | 122.6(5) |
| C15-C16-Cl1 | 117.3(4) | C11-C16-Cl1 | 120.0(4) |
| C8-N1-C1    | 125.4(4) | C8-N1-C3    | 122.9(4) |
| C1-N1-C3    | 109.9(4) | C1-O1-C2    | 110.6(4) |

**Table 6. Torsion angles (°).**

|                 |           |                 |           |
|-----------------|-----------|-----------------|-----------|
| O1-C2-C3-N1     | -23.3(6)  | O1-C2-C3-C4     | 98.0(5)   |
| N1-C3-C4-C5     | 56.9(6)   | C2-C3-C4-C5     | -56.8(6)  |
| N1-C3-C4-C6     | 178.9(4)  | C2-C3-C4-C6     | 65.2(5)   |
| N1-C3-C4-C7     | -64.1(5)  | C2-C3-C4-C7     | -177.8(5) |
| O3-C8-C9-C10    | -16.3(7)  | N1-C8-C9-C10    | 161.4(4)  |
| C8-C9-C10-C11   | -65.3(6)  | C8-C9-C10-Br1   | 174.4(3)  |
| C9-C10-C11-C16  | 155.9(4)  | Br1-C10-C11-C16 | -86.0(5)  |
| C9-C10-C11-C12  | -22.9(6)  | Br1-C10-C11-C12 | 95.2(5)   |
| C16-C11-C12-C13 | -0.8(7)   | C10-C11-C12-C13 | 178.1(4)  |
| C11-C12-C13-C14 | -0.4(8)   | C12-C13-C14-C15 | 0.8(8)    |
| C13-C14-C15-C16 | 0.0(8)    | C14-C15-C16-C11 | -1.3(8)   |
| C14-C15-C16-Cl1 | -179.5(4) | C12-C11-C16-C15 | 1.6(7)    |
| C10-C11-C16-C15 | -177.2(4) | C12-C11-C16-Cl1 | 179.8(4)  |
| C10-C11-C16-Cl1 | 0.9(6)    | O3-C8-N1-C1     | -162.8(5) |
| C9-C8-N1-C1     | 19.5(7)   | O3-C8-N1-C3     | 0.4(7)    |
| C9-C8-N1-C3     | -177.3(4) | O2-C1-N1-C8     | -25.4(9)  |

|             |           |             |           |
|-------------|-----------|-------------|-----------|
| O1-C1-N1-C8 | 155.4(5)  | O2-C1-N1-C3 | 169.5(6)  |
| O1-C1-N1-C3 | -9.7(6)   | C2-C3-N1-C8 | -145.2(5) |
| C4-C3-N1-C8 | 92.5(5)   | C2-C3-N1-C1 | 20.3(6)   |
| C4-C3-N1-C1 | -102.0(5) | O2-C1-O1-C2 | 174.0(6)  |
| N1-C1-O1-C2 | -6.8(6)   | C3-C2-O1-C1 | 19.7(7)   |

**Table 7. Anisotropic atomic displacement parameters ( $\text{\AA}^2$ ).**

The anisotropic atomic displacement factor exponent takes the form:  $-2\pi^2[ h^2 a^{*2} U_{11} + \dots + 2 h k a^* b^* U_{12} ]$

|     | $U_{11}$   | $U_{22}$   | $U_{33}$   | $U_{23}$   | $U_{13}$   | $U_{12}$   |
|-----|------------|------------|------------|------------|------------|------------|
| Br1 | 0.0588(3)  | 0.0549(3)  | 0.0371(2)  | 0.0052(2)  | 0.0008(2)  | -0.0084(2) |
| C1  | 0.059(3)   | 0.032(2)   | 0.052(3)   | 0.005(2)   | 0.013(3)   | -0.002(2)  |
| C2  | 0.086(5)   | 0.063(4)   | 0.051(3)   | -0.005(3)  | -0.005(3)  | -0.031(3)  |
| C3  | 0.039(2)   | 0.046(3)   | 0.037(2)   | 0.0009(19) | 0.0021(18) | -0.003(2)  |
| C4  | 0.038(3)   | 0.038(2)   | 0.036(2)   | 0.0007(17) | 0.0022(18) | 0.0032(18) |
| C5  | 0.051(3)   | 0.084(4)   | 0.076(4)   | 0.026(4)   | 0.010(3)   | 0.015(3)   |
| C6  | 0.057(3)   | 0.087(4)   | 0.041(2)   | 0.004(3)   | 0.003(3)   | -0.002(3)  |
| C7  | 0.085(4)   | 0.055(3)   | 0.062(3)   | -0.008(3)  | 0.020(3)   | -0.031(3)  |
| C8  | 0.041(2)   | 0.038(2)   | 0.039(2)   | 0.0028(19) | 0.0033(18) | -0.005(2)  |
| C9  | 0.063(3)   | 0.033(2)   | 0.041(2)   | 0.0058(18) | -0.001(2)  | -0.009(2)  |
| C10 | 0.048(3)   | 0.042(2)   | 0.035(2)   | 0.0019(18) | -0.001(2)  | -0.004(2)  |
| C11 | 0.038(2)   | 0.038(2)   | 0.034(2)   | 0.0027(17) | 0.0023(17) | 0.0003(18) |
| C12 | 0.055(3)   | 0.041(3)   | 0.050(3)   | 0.000(2)   | 0.001(2)   | 0.004(2)   |
| C13 | 0.036(3)   | 0.094(4)   | 0.053(3)   | 0.013(3)   | 0.009(2)   | 0.002(3)   |
| C14 | 0.061(3)   | 0.059(3)   | 0.061(3)   | 0.011(3)   | -0.002(3)  | -0.020(3)  |
| C15 | 0.066(4)   | 0.043(3)   | 0.054(3)   | 0.008(2)   | -0.007(3)  | -0.015(3)  |
| C16 | 0.049(3)   | 0.035(2)   | 0.046(2)   | 0.0026(18) | 0.002(2)   | 0.005(2)   |
| Cl1 | 0.0721(10) | 0.0544(8)  | 0.0987(12) | -0.0142(8) | 0.0230(9)  | 0.0128(7)  |
| N1  | 0.040(2)   | 0.0309(17) | 0.0363(18) | 0.0037(14) | 0.0009(15) | 0.0017(16) |
| O1  | 0.106(4)   | 0.0376(18) | 0.064(2)   | 0.0078(17) | 0.011(2)   | -0.020(2)  |
| O2  | 0.094(3)   | 0.0376(17) | 0.061(2)   | 0.0126(16) | 0.009(2)   | 0.0099(19) |
| O3  | 0.072(3)   | 0.0392(18) | 0.0481(19) | 0.0030(15) | 0.0071(18) | 0.0144(17) |



**Table 8. Hydrogen atomic coordinates and isotropic atomic displacement parameters ( $\text{\AA}^2$ ).**

|     | x/a    | y/b    | z/c    | U(eq) |
|-----|--------|--------|--------|-------|
| H2A | 0.2042 | 0.2602 | 0.3297 | 0.08  |
| H2B | 0.3954 | 0.2492 | 0.2866 | 0.08  |
| H3  | 0.2926 | 0.4227 | 0.3473 | 0.049 |
| H5A | 0.7724 | 0.3403 | 0.3796 | 0.105 |
| H5B | 0.8564 | 0.3778 | 0.3065 | 0.105 |
| H5C | 0.7227 | 0.2808 | 0.3090 | 0.105 |
| H6A | 0.6415 | 0.4628 | 0.2163 | 0.092 |
| H6B | 0.4238 | 0.4689 | 0.2329 | 0.092 |
| H6C | 0.5194 | 0.3613 | 0.2182 | 0.092 |
| H7A | 0.6631 | 0.5185 | 0.3972 | 0.101 |
| H7B | 0.5144 | 0.5677 | 0.3450 | 0.101 |
| H7C | 0.7260 | 0.5545 | 0.3209 | 0.101 |
| H9A | 0.3223 | 0.3592 | 0.5777 | 0.055 |
| H9B | 0.5406 | 0.3692 | 0.5627 | 0.055 |
| H10 | 0.3065 | 0.5374 | 0.6024 | 0.05  |
| H12 | 0.7695 | 0.4773 | 0.5438 | 0.059 |
| H13 | 1.0050 | 0.5955 | 0.5185 | 0.073 |
| H14 | 0.9627 | 0.7683 | 0.5489 | 0.072 |
| H15 | 0.6915 | 0.8188 | 0.6058 | 0.065 |

**Table 9. Hydrogen bond distances ( $\text{\AA}$ ) and angles ( $^\circ$ ).**

|                         | Donor-<br>H | Acceptor-<br>H | Donor-<br>Acceptor | Angle |
|-------------------------|-------------|----------------|--------------------|-------|
| C15-<br>H15 $\cdots$ O3 | 0.93        | 2.67           | 3.316(6)           | 127.2 |
